# Supplementary material for: Selective sweep with significant positive selection serves as the driving force for the differentiation of japonica and indica rice cultivars
Source: PubMed Central journal article supplement (PMC5395770; doi:10.1186/s12864-017-3702-x), 2017-04-19
Supplement: 12864_2017_3702_MOESM1_ESM.pdf [file 12864_2017_3702_MOESM1_ESM.pdf]

**Selective sweep with significant positive selection serves as the driving force for the differentiation of *japonica* and *indica* rice cultivars**

Yang Yuan<sup>1,2,4</sup>, Qijun Zhang<sup>3,4</sup>, Shuiyun Zeng<sup>2,4</sup>, Longjiang Gu<sup>2</sup>, Weina Si<sup>2</sup>, Xiaohui Zhang<sup>2</sup>, Dacheng Tian<sup>2</sup>, Sihai Yang<sup>2,\*</sup>, Long Wang<sup>2,\*</sup>

<sup>1</sup> The Applied Plant Genomics Laboratory, College of Agricultural Sciences, Nanjing Agricultural University, Nanjing, 210095, China

<sup>2</sup> State Key Laboratory of Pharmaceutical Biotechnology, School of Life Sciences, Nanjing University, Nanjing 210023, China

<sup>3</sup> Jiangsu Academy of Agricultural Sciences, Nanjing 210000, China.

<sup>4</sup> These authors contributed equally to this work

**Figure S1** PCA plots of the first two components before (a) and after

(b) sample selection.

(a)

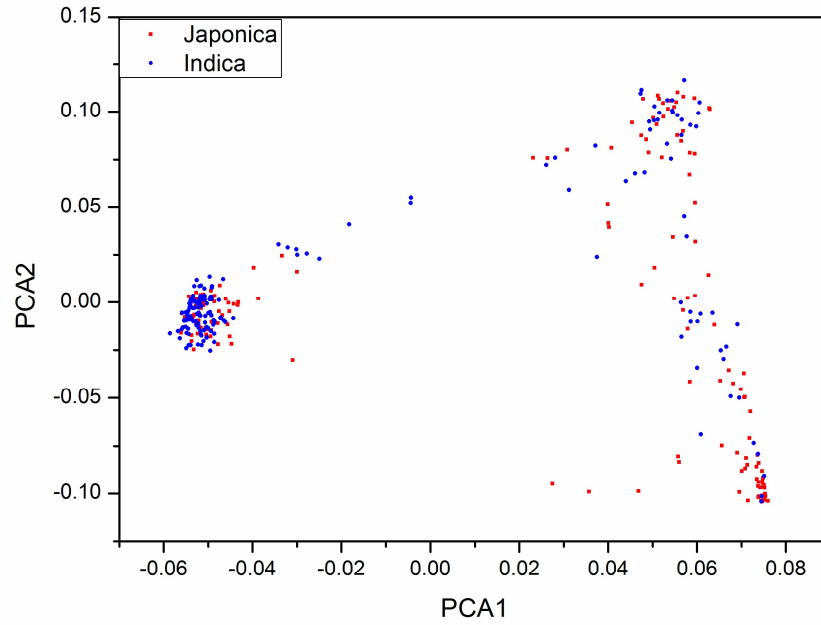

(b)

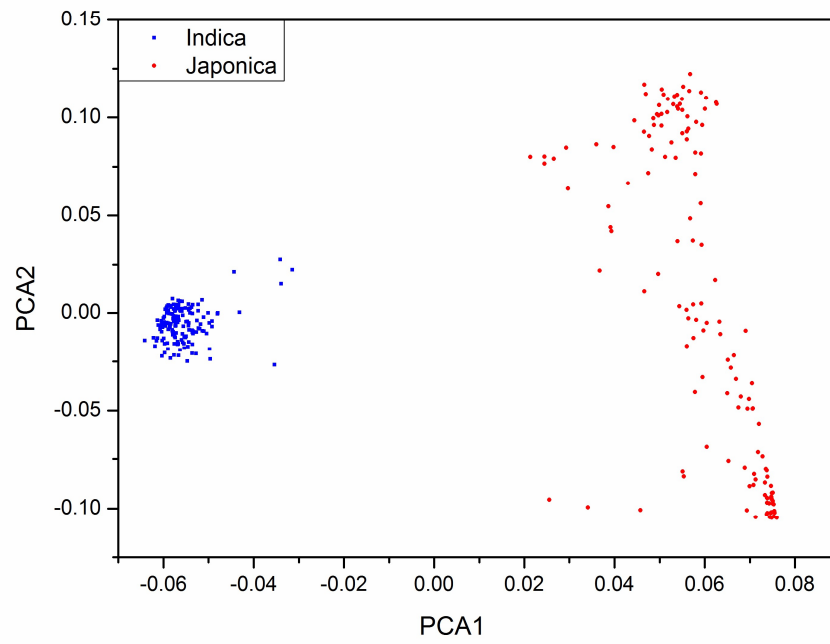

**Figure S2** The proportions of the genome-wide diversity within the groups of *japonica*, *indica* and wild rice and divergence between *japonica* and *indica* group.

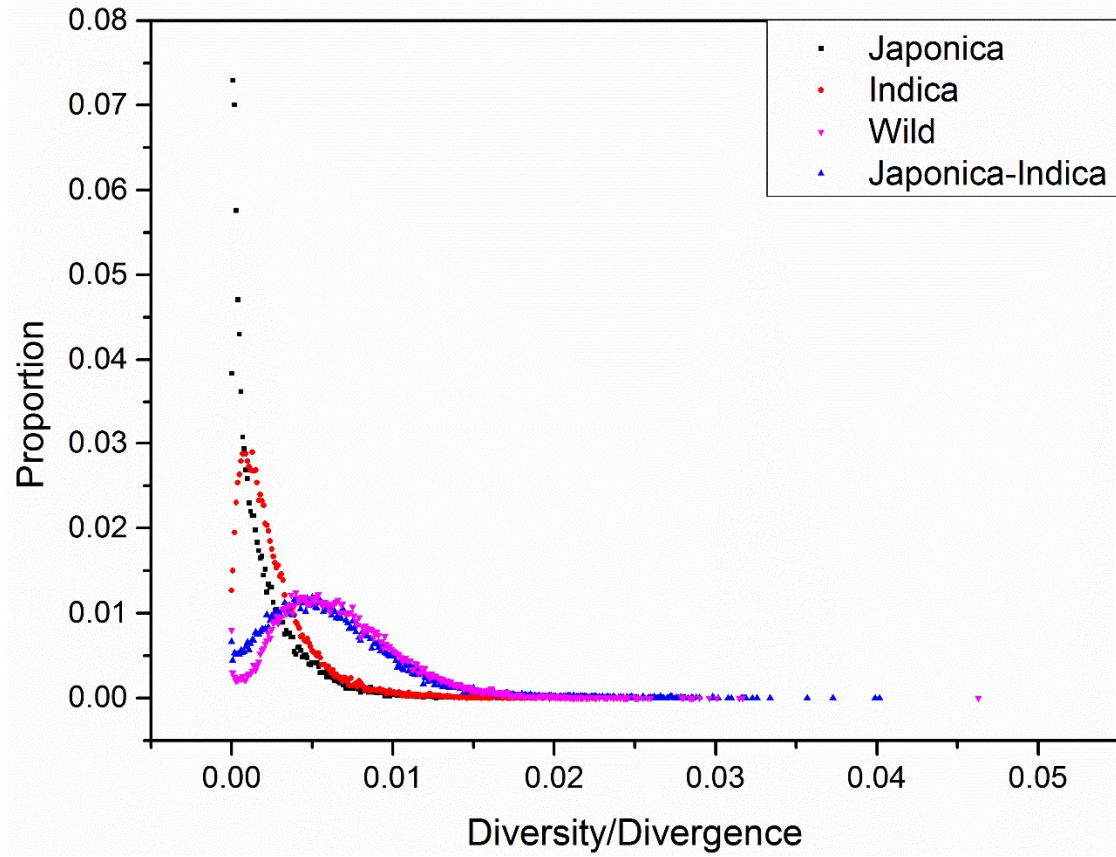

**Figure S3** Diversity/divergence relationship between rice groups. (a) Relationship of the diversity within *indica* vs. *japonica*; (b) Relationship of diversity within *japonica* vs. divergence between *indica* and *japonica*; (c) Relationship of diversity within *indica* vs. divergence between *indica* and *japonica*; (d) Relationship of divergence between  $D_{jap-wild}$  and  $D_{ind-wild}$ .

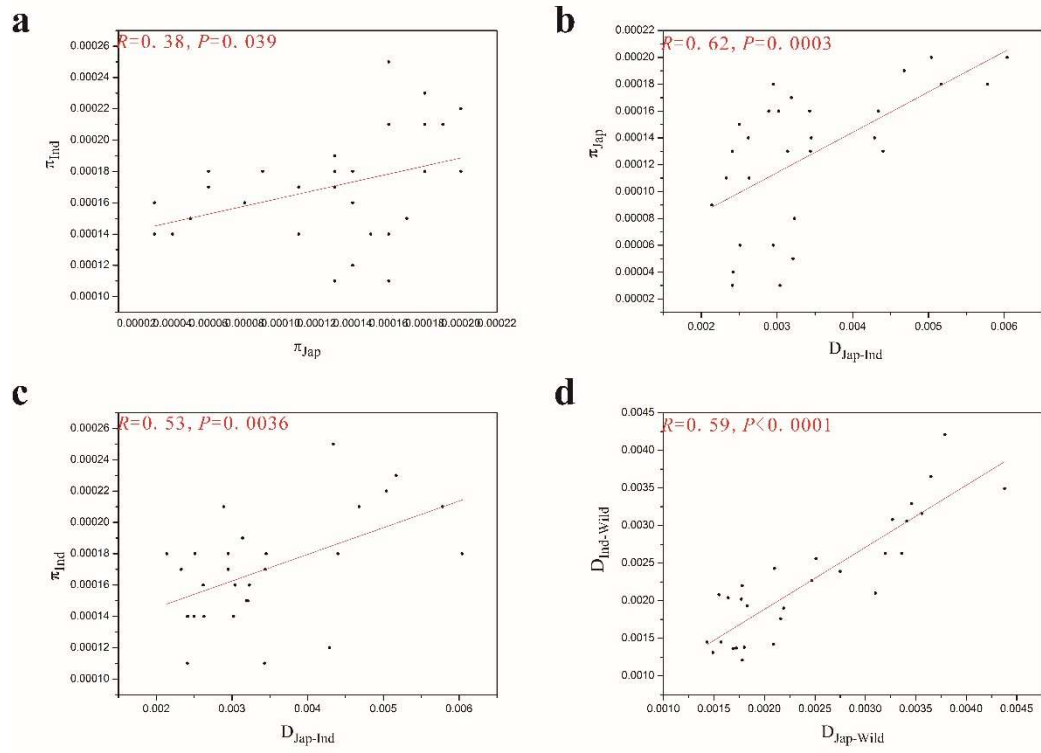

**Figure S4** GO statistic of the DR-I regions. The X-axis showed different GO functions and the Y-axis represents the proportion of the regional counts of selected GO function to the whole genome counts. Chi-square test was applied and \* stands for FDR<0.05 and \*\* stands for FDR<0.01.

The words in x-axis were short description of GO numbers. For instance, “Behavior” is the short description of GO:0007610, which means behavioral response to stimulus or behavior, behavioral response to stimulus. The same to **Supplementary Figure S5**.

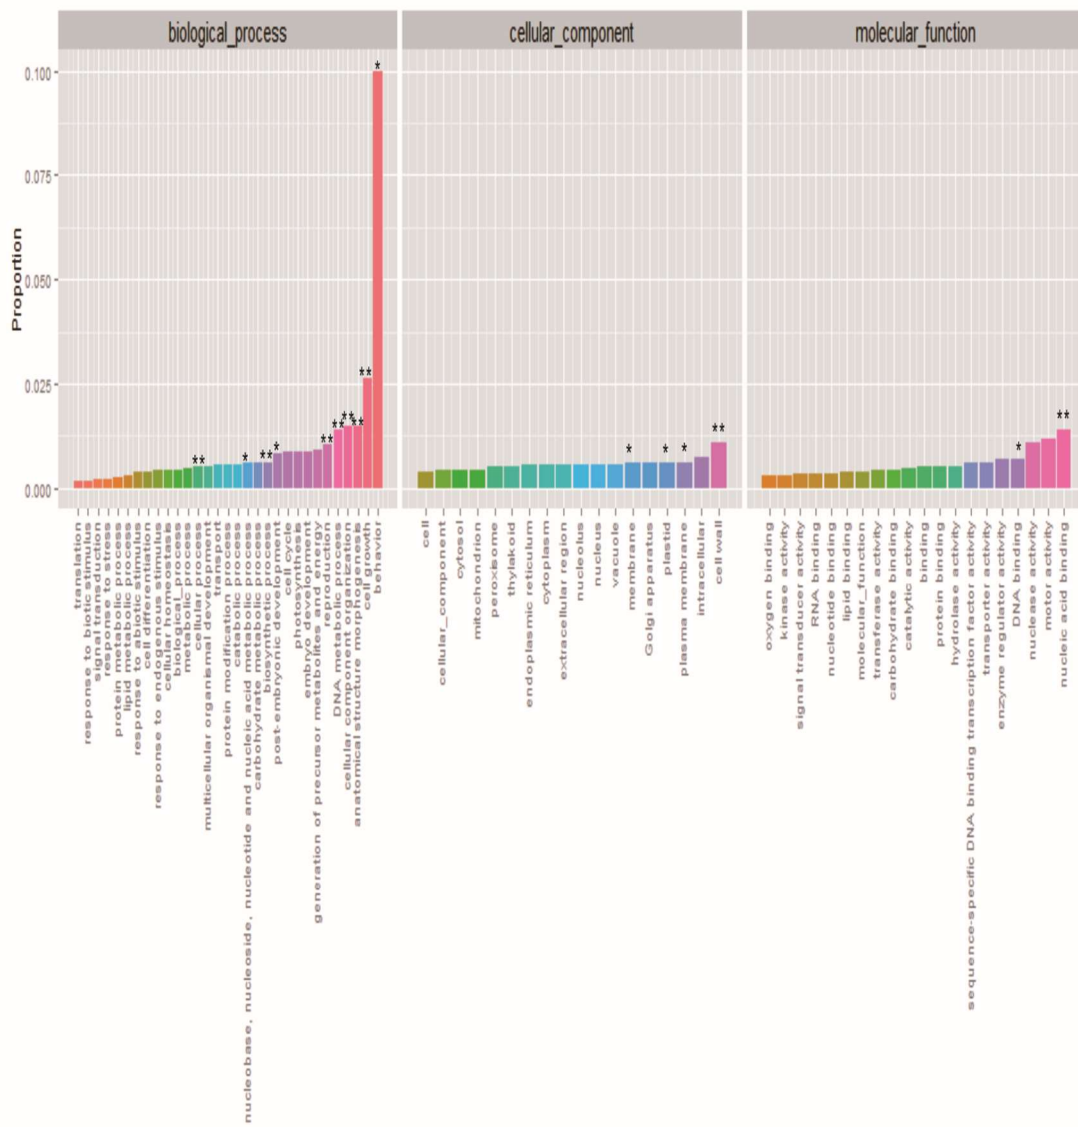



**Figure S6** Clustered DR-I regions in chr03. The arrows showed the selected DR-I regions in this research. The dotted line showed the value of  $\pi = 0.0002$ .

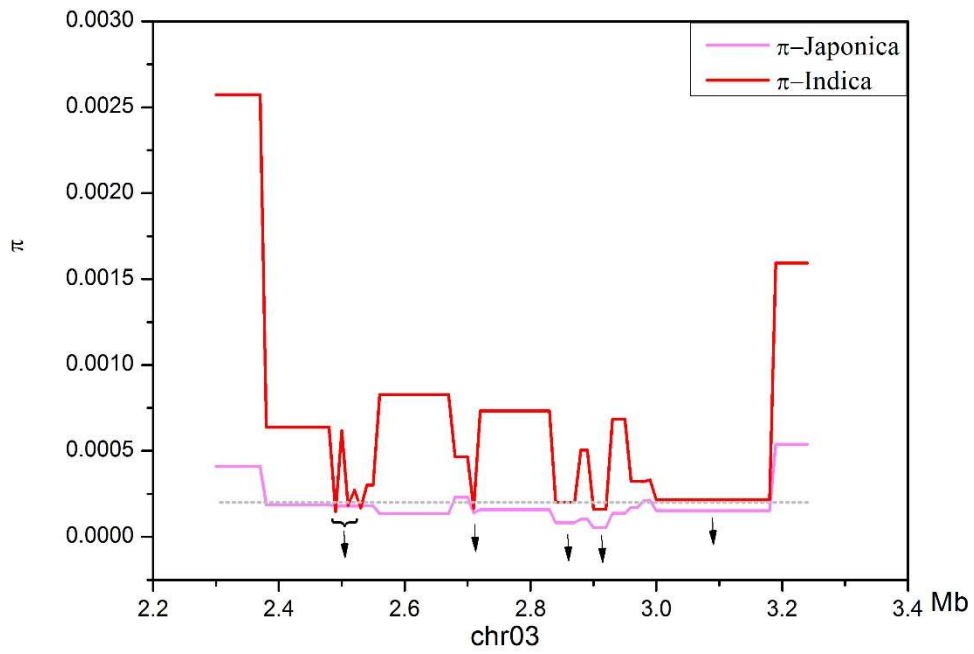

**Figure S7** Clustered regions of DR-II. Grey line represents the  $\pi$  value equals 0.0002. The arrows showed the selected regions. The dotted line showed the value of  $\pi= 0.0002$  (a) 7 regions clustered in chr04:26.0-27.1Mb. (b) Nine regions clustered in chr07:2.7-4.1Mb

(a)

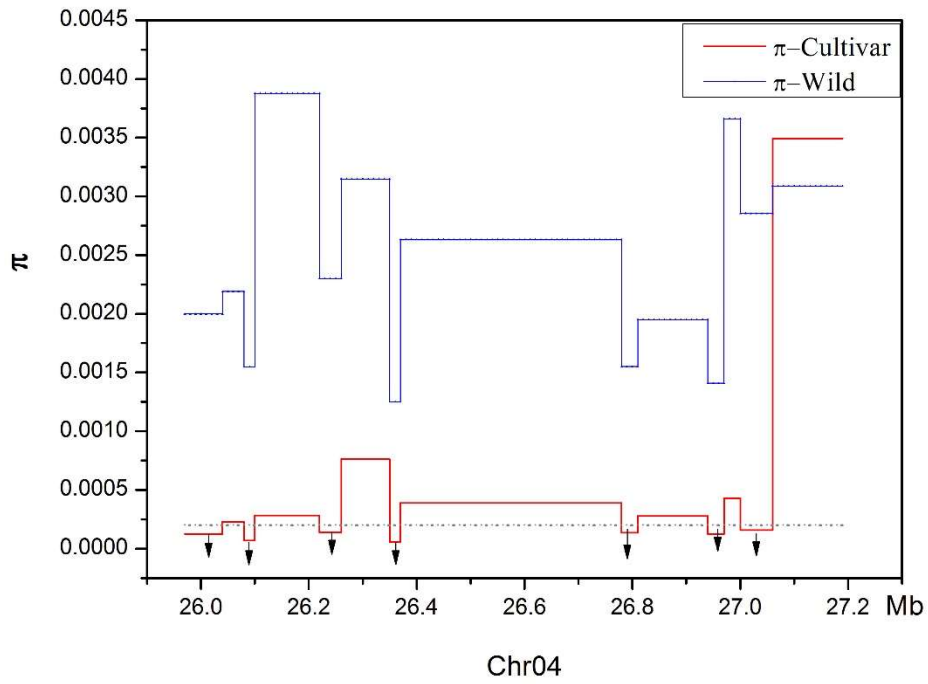



(b)

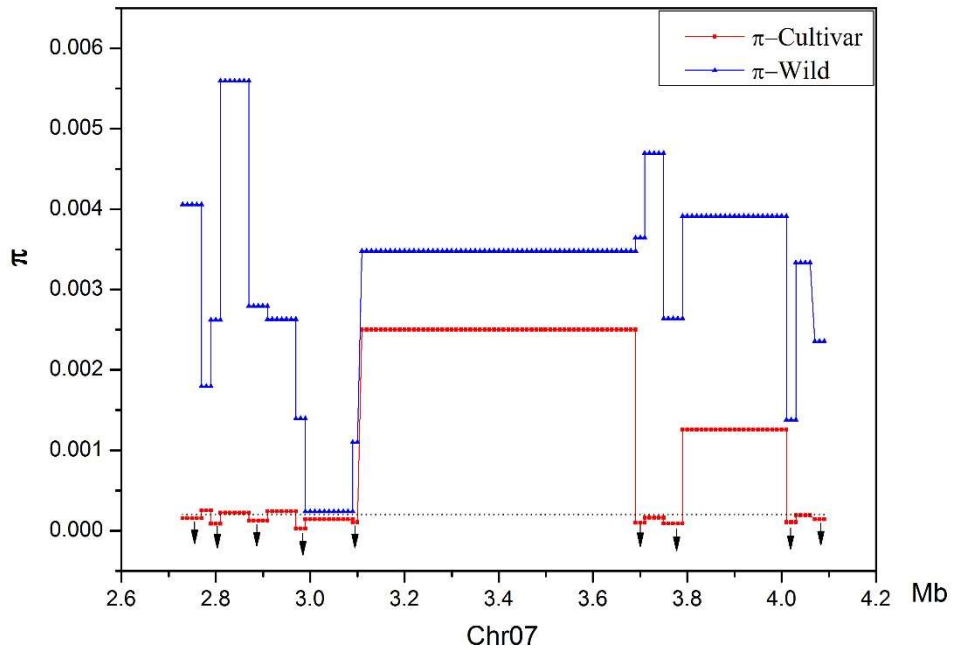

**Table S1** List of 330 rice cultivars downloaded from the 3K-rice project. In this list, only 296 cultivars were used in this project and 34 cultivars were removed after diversity and PCA analysis.

| <b>Sample ID</b>                                    | <b>Variety Group</b> | <b>Area of origin</b> | <b>Depth</b> | <b>Coverage<sup>1</sup></b> |
|-----------------------------------------------------|----------------------|-----------------------|--------------|-----------------------------|
| List of the 296 rice cultivars used in this project |                      |                       |              |                             |
| B001                                                | Temperate_Japonica   | China                 | 27.59        | 0.94                        |
| B003                                                | Temperate_Japonica   | China                 | 16.66        | 0.86                        |
| B005                                                | Temperate_Japonica   | Japan                 | 17.06        | 0.91                        |
| B008                                                | Temperate_Japonica   | Vietnam               | 15.32        | 0.9                         |
| B012                                                | Indica               | India                 | 24.14        | 0.86                        |
| B015                                                | Indica               | Romania               | 22.71        | 0.85                        |
| B016                                                | Temperate_Japonica   | Hungary               | 19.47        | 0.9                         |
| B017                                                | Temperate_Japonica   | Bulgaria              | 18.28        | 0.9                         |
| B018                                                | Tropical_Japonica    | United States         | 22.34        | 0.9                         |
| B023                                                | Temperate_Japonica   | North Korea           | 15.96        | 0.89                        |
| B026                                                | Indica               | Indonesia             | 22.79        | 0.85                        |
| B034                                                | Temperate_Japonica   | Albania               | 17.21        | 0.91                        |
| B036                                                | Temperate_Japonica   | Brazil                | 17.55        | 0.88                        |
| B043                                                | Tropical_Japonica    | Australia             | 15.23        | 0.87                        |
| B045                                                | Temperate_Japonica   | Japan                 | 20.11        | 0.92                        |
| B046                                                | Temperate_Japonica   | Japan                 | 19.53        | 0.92                        |
| B066                                                | Temperate_Japonica   | China                 | 18.96        | 0.89                        |
| B070                                                | Temperate_Japonica   | China                 | 20.76        | 0.89                        |
| B097                                                | Indica               | China                 | 24.8         | 0.86                        |
| B100                                                | Temperate_Japonica   | China                 | 17.35        | 0.89                        |
| B111                                                | Temperate_Japonica   | China                 | 15.99        | 0.87                        |
| B143                                                | Japonica             | China                 | 15.5         | 0.87                        |
| B160                                                | Temperate_Japonica   | China                 | 22.43        | 0.9                         |
| B162                                                | Temperate_Japonica   | China                 | 22.69        | 0.89                        |
| B167                                                | Temperate_Japonica   | North Korea           | 19.33        | 0.89                        |
| B182                                                | Temperate_Japonica   | Japan                 | 24.85        | 0.9                         |
| B183                                                | Temperate_Japonica   | Japan                 | 19.81        | 0.92                        |
| B190                                                | Tropical_Japonica    | Nigeria               | 21.76        | 0.88                        |
| B191                                                | Tropical_Japonica    | Australia             | 20.04        | 0.88                        |
| B196                                                | Japonica             | China                 | 15.64        | 0.84                        |
| B204                                                | Temperate_Japonica   | China                 | 27.22        | 0.91                        |
| B210                                                | Indica               | China                 | 25.54        | 0.84                        |
| B212                                                | Temperate_Japonica   | China                 | 23.95        | 0.89                        |
| B214                                                | Indica               | China                 | 27.48        | 0.85                        |
| B218                                                | Temperate_Japonica   | China                 | 16.62        | 0.89                        |
| B225                                                | Temperate_Japonica   | China                 | 17.81        | 0.89                        |

|       |                    |             |       |      |
|-------|--------------------|-------------|-------|------|
| B226  | Temperate_Japonica | China       | 19.01 | 0.89 |
| B230  | Temperate_Japonica | China       | 16.3  | 0.87 |
| B241  | Tropical_Japonica  | China       | 16.54 | 0.87 |
| B250  | Temperate_Japonica | China       | 21.76 | 0.92 |
| B258  | Temperate_Japonica | China       | 16.52 | 0.88 |
| B261  | Indica             | China       | 22.86 | 0.85 |
| B264  | Indica             | China       | 28.91 | 0.86 |
| B265  | Indica             | China       | 32.13 | 0.87 |
| B266  | Tropical_Japonica  | China       | 15.28 | 0.86 |
| B269  | Temperate_Japonica | China       | 29.58 | 0.94 |
| CX101 | Indica             | Taiwan      | 23.07 | 0.85 |
| CX102 | Indica             | Taiwan      | 22.29 | 0.85 |
| CX106 | Tropical_Japonica  | Vietnam     | 21.69 | 0.91 |
| CX109 | Japonica           | Philippines | 26.55 | 0.91 |
| CX111 | Tropical_Japonica  | Egypt       | 20.8  | 0.9  |
| CX138 | Japonica           | China       | 19.12 | 0.9  |
| CX139 | Japonica           | Portugal    | 15.11 | 0.83 |
| CX142 | Temperate_Japonica | China       | 20.64 | 0.9  |
| CX147 | Indica             | -           | 22.8  | 0.85 |
| CX150 | Indica             | Philippines | 21.94 | 0.84 |
| CX152 | Indica             | -           | 23.49 | 0.85 |
| CX154 | Indica             | Thailand    | 22.85 | 0.85 |
| CX155 | Indica             | India       | 23.24 | 0.85 |
| CX16  | Temperate_Japonica | China       | 15.22 | 0.83 |
| CX205 | Japonica           | Philippines | 16.5  | 0.85 |
| CX220 | Tropical_Japonica  | Brazil      | 22.5  | 0.9  |
| CX225 | Indica             | Philippines | 23.94 | 0.87 |
| CX241 | Japonica           | Philippines | 15.31 | 0.82 |
| CX243 | Japonica           | Philippines | 17.81 | 0.86 |
| CX262 | Japonica           | China       | 19.83 | 0.88 |
| CX269 | Tropical_Japonica  | Brazil      | 20.89 | 0.89 |
| CX285 | Japonica           | China       | 18.86 | 0.89 |
| CX3   | Indica             | Bangladesh  | 22.06 | 0.85 |
| CX306 | Temperate_Japonica | China       | 17.42 | 0.89 |
| CX315 | Temperate_Japonica | North Korea | 16.94 | 0.88 |
| CX329 | Temperate_Japonica | China       | 15.02 | 0.88 |
| CX353 | Japonica           | China       | 21.56 | 0.88 |
| CX354 | Temperate_Japonica | China       | 16.48 | 0.85 |
| CX355 | Japonica           | China       | 20.03 | 0.86 |
| CX383 | Temperate_Japonica | China       | 19.57 | 0.91 |
| CX389 | Japonica           | China       | 24.74 | 0.91 |
| CX391 | Temperate_Japonica | China       | 15.62 | 0.87 |
| CX98  | Indica             | India       | 24.71 | 0.86 |

|                |                    |               |       |      |
|----------------|--------------------|---------------|-------|------|
| CX99           | Indica             | India         | 24.78 | 0.86 |
| IRIS_313-10010 | Indica             | Fiji          | 23.45 | 0.86 |
| IRIS_313-10097 | Temperate_Japonica | South Korea   | 23.44 | 0.94 |
| IRIS_313-10171 | Indica             | China         | 25.92 | 0.87 |
| IRIS_313-10177 | Indica             | China         | 33.67 | 0.88 |
| IRIS_313-10235 | Indica             | Philippines   | 23.59 | 0.87 |
| IRIS_313-10440 | Temperate_Japonica | Philippines   | 16.21 | 0.89 |
| IRIS_313-10511 | Indica             | Philippines   | 22.7  | 0.86 |
| IRIS_313-10541 | Tropical_Japonica  | Guinea-Bissau | 17.03 | 0.89 |
| IRIS_313-10563 | Temperate_Japonica | -             | 17.68 | 0.9  |
| IRIS_313-10564 | Temperate_Japonica | Japan         | 16.71 | 0.93 |
| IRIS_313-10570 | Temperate_Japonica | Japan         | 15.37 | 0.91 |
| IRIS_313-10577 | Tropical_Japonica  | Philippines   | 23.08 | 0.91 |
| IRIS_313-10578 | Tropical_Japonica  | Philippines   | 17.57 | 0.88 |
| IRIS_313-10582 | Tropical_Japonica  | Philippines   | 25.49 | 0.91 |
| IRIS_313-10609 | Indica             | Sri Lanka     | 26.23 | 0.87 |
| IRIS_313-10617 | Temperate_Japonica | -             | 15.53 | 0.89 |
| IRIS_313-10642 | Temperate_Japonica | Japan         | 20.68 | 0.89 |
| IRIS_313-10657 | Tropical_Japonica  | Laos          | 18.22 | 0.9  |
| IRIS_313-10677 | Temperate_Japonica | Japan         | 15.08 | 0.93 |
| IRIS_313-10725 | Indica             | Senegal       | 21.03 | 0.86 |
| IRIS_313-10744 | Japonica           | Indonesia     | 15.34 | 0.88 |
| IRIS_313-10793 | Tropical_Japonica  | Indonesia     | 19.4  | 0.9  |
| IRIS_313-10798 | Tropical_Japonica  | Indonesia     | 17.36 | 0.9  |
| IRIS_313-10834 | Tropical_Japonica  | India         | 15.48 | 0.89 |
| IRIS_313-10840 | Temperate_Japonica | South Korea   | 16.47 | 0.92 |
| IRIS_313-10857 | Indica             | India         | 26.16 | 0.87 |
| IRIS_313-10858 | Indica             | India         | 33.15 | 0.89 |
| IRIS_313-10863 | Indica             | India         | 26.42 | 0.87 |
| IRIS_313-10870 | Tropical_Japonica  | India         | 22.13 | 0.91 |
| IRIS_313-10872 | Japonica           | India         | 24.86 | 0.93 |
| IRIS_313-10916 | Temperate_Japonica | Cambodia      | 15.67 | 0.9  |
| IRIS_313-10918 | Japonica           | Philippines   | 26.15 | 0.92 |
| IRIS_313-10923 | Tropical_Japonica  | Thailand      | 16.02 | 0.88 |
| IRIS_313-10960 | Tropical_Japonica  | Indonesia     | 15.86 | 0.87 |
| IRIS_313-10975 | Indica             | Bangladesh    | 25.31 | 0.87 |
| IRIS_313-10986 | Indica             | Bangladesh    | 25.61 | 0.87 |
| IRIS_313-10994 | Japonica           | Philippines   | 16.33 | 0.87 |
| IRIS_313-10999 | Tropical_Japonica  | Indonesia     | 16.05 | 0.87 |
| IRIS_313-11044 | Japonica           | Malaysia      | 21.67 | 0.91 |
| IRIS_313-11046 | Japonica           | Malaysia      | 25.16 | 0.91 |
| IRIS_313-11083 | Indica             | Laos          | 27.82 | 0.87 |
| IRIS_313-11085 | Indica             | Laos          | 24.58 | 0.87 |

|                |                    |              |       |      |
|----------------|--------------------|--------------|-------|------|
| IRIS_313-11089 | Indica             | Cambodia     | 27.17 | 0.87 |
| IRIS_313-11094 | Tropical_Japonica  | Laos         | 22.27 | 0.91 |
| IRIS_313-11097 | Indica             | Philippines  | 27.54 | 0.88 |
| IRIS_313-11102 | Tropical_Japonica  | Liberia      | 29.31 | 0.92 |
| IRIS_313-11103 | Tropical_Japonica  | Liberia      | 24.61 | 0.92 |
| IRIS_313-11104 | Tropical_Japonica  | Liberia      | 20.66 | 0.91 |
| IRIS_313-11113 | Indica             | Bangladesh   | 24.21 | 0.87 |
| IRIS_313-11118 | Indica             | Vietnam      | 25.09 | 0.87 |
| IRIS_313-11151 | Indica             | Myanmar      | 24.4  | 0.86 |
| IRIS_313-11202 | Temperate_Japonica | China        | 22.88 | 0.93 |
| IRIS_313-11205 | Indica             | Bangladesh   | 23.75 | 0.85 |
| IRIS_313-11229 | Indica             | Bangladesh   | 22.28 | 0.86 |
| IRIS_313-11234 | Indica             | Philippines  | 27.39 | 0.87 |
| IRIS_313-11238 | Tropical_Japonica  | Brazil       | 20.1  | 0.9  |
| IRIS_313-11239 | Indica             | Indonesia    | 28.31 | 0.88 |
| IRIS_313-11241 | Indica             | Bangladesh   | 27.5  | 0.87 |
| IRIS_313-11242 | Indica             | India        | 29.14 | 0.89 |
| IRIS_313-11244 | Indica             | India        | 25.16 | 0.87 |
| IRIS_313-11245 | Indica             | India        | 24.95 | 0.87 |
| IRIS_313-11247 | Indica             | India        | 24.76 | 0.86 |
| IRIS_313-11251 | Indica             | Philippines  | 24.18 | 0.86 |
| IRIS_313-11253 | Indica             | Suriname     | 22.74 | 0.87 |
| IRIS_313-11256 | Indica             | India        | 22.4  | 0.86 |
| IRIS_313-11260 | Indica             | India        | 27.75 | 0.89 |
| IRIS_313-11263 | Indica             | India        | 25.87 | 0.87 |
| IRIS_313-11266 | Indica             | India        | 25.19 | 0.87 |
| IRIS_313-11267 | Indica             | India        | 26.14 | 0.87 |
| IRIS_313-11273 | Indica             | India        | 30.95 | 0.87 |
| IRIS_313-11279 | Indica             | India        | 29.31 | 0.89 |
| IRIS_313-11395 | Indica             | Indonesia    | 22.28 | 0.86 |
| IRIS_313-11642 | Indica             | India        | 24.3  | 0.87 |
| IRIS_313-11643 | Indica             | India        | 34.37 | 0.88 |
| IRIS_313-11644 | Indica             | India        | 28.87 | 0.88 |
| IRIS_313-11645 | Indica             | India        | 34.39 | 0.88 |
| IRIS_313-11646 | Indica             | India        | 35.29 | 0.88 |
| IRIS_313-11648 | Indica             | India        | 26.98 | 0.87 |
| IRIS_313-11651 | Temperate_Japonica | China        | 33.15 | 0.96 |
| IRIS_313-11652 | Temperate_Japonica | China        | 26.9  | 0.93 |
| IRIS_313-11656 | Indica             | Indonesia    | 34.74 | 0.88 |
| IRIS_313-11659 | Tropical_Japonica  | Sierra Leone | 25.83 | 0.92 |
| IRIS_313-11663 | Indica             | Zimbabwe     | 30.14 | 0.88 |
| IRIS_313-11664 | Indica             | China        | 38.39 | 0.89 |
| IRIS_313-11665 | Indica             | China        | 36.32 | 0.89 |

|                |                   |            |       |      |
|----------------|-------------------|------------|-------|------|
| IRIS_313-11667 | Indica            | China      | 23.62 | 0.87 |
| IRIS_313-11668 | Indica            | China      | 36.08 | 0.89 |
| IRIS_313-11669 | Indica            | China      | 51.09 | 0.91 |
| IRIS_313-11677 | Indica            | Thailand   | 25.01 | 0.87 |
| IRIS_313-11681 | Indica            | Thailand   | 34.8  | 0.88 |
| IRIS_313-11683 | Indica            | Thailand   | 33.38 | 0.88 |
| IRIS_313-11684 | Indica            | Thailand   | 27.42 | 0.87 |
| IRIS_313-11685 | Indica            | Thailand   | 30.53 | 0.88 |
| IRIS_313-11686 | Indica            | Thailand   | 34.35 | 0.89 |
| IRIS_313-11687 | Indica            | Thailand   | 31.7  | 0.88 |
| IRIS_313-11692 | Indica            | Taiwan     | 28.46 | 0.88 |
| IRIS_313-11700 | Indica            | Thailand   | 30.55 | 0.88 |
| IRIS_313-11704 | Indica            | Thailand   | 26.91 | 0.87 |
| IRIS_313-11705 | Indica            | Thailand   | 29.11 | 0.88 |
| IRIS_313-11707 | Indica            | Thailand   | 26.99 | 0.88 |
| IRIS_313-11708 | Indica            | Thailand   | 26.81 | 0.88 |
| IRIS_313-11709 | Indica            | Thailand   | 28.74 | 0.88 |
| IRIS_313-11710 | Indica            | Thailand   | 34.09 | 0.89 |
| IRIS_313-11716 | Indica            | Guinea     | 25.47 | 0.87 |
| IRIS_313-11717 | Indica            | Indonesia  | 34.52 | 0.88 |
| IRIS_313-11719 | Indica            | Thailand   | 28.36 | 0.88 |
| IRIS_313-11720 | Indica            | Thailand   | 25.39 | 0.87 |
| IRIS_313-11721 | Indica            | Thailand   | 27.9  | 0.88 |
| IRIS_313-11722 | Indica            | Bangladesh | 36.38 | 0.89 |
| IRIS_313-11723 | Indica            | Guinea     | 40.18 | 0.89 |
| IRIS_313-11727 | Indica            | China      | 31.55 | 0.89 |
| IRIS_313-11728 | Indica            | China      | 30.78 | 0.88 |
| IRIS_313-11730 | Indica            | China      | 32.66 | 0.89 |
| IRIS_313-11731 | Indica            | China      | 33.69 | 0.89 |
| IRIS_313-11732 | Indica            | China      | 24.46 | 0.88 |
| IRIS_313-11733 | Indica            | China      | 21.76 | 0.87 |
| IRIS_313-11734 | Indica            | China      | 24.18 | 0.87 |
| IRIS_313-11740 | Indica            | Ghana      | 32.57 | 0.89 |
| IRIS_313-11744 | Indica            | China      | 31    | 0.89 |
| IRIS_313-11745 | Indica            | China      | 31.86 | 0.89 |
| IRIS_313-11746 | Indica            | China      | 28.84 | 0.88 |
| IRIS_313-11748 | Indica            | China      | 27.86 | 0.88 |
| IRIS_313-11750 | Indica            | China      | 26.81 | 0.88 |
| IRIS_313-11751 | Indica            | China      | 23.45 | 0.87 |
| IRIS_313-11752 | Indica            | China      | 31.61 | 0.88 |
| IRIS_313-11755 | Tropical Japonica | Liberia    | 32.33 | 0.93 |
| IRIS_313-11757 | Indica            | Madagascar | 23.71 | 0.87 |
| IRIS_313-11760 | Indica            | Madagascar | 26.04 | 0.88 |

|                |                    |             |       |      |
|----------------|--------------------|-------------|-------|------|
| IRIS_313-11761 | Indica             | Ivory Coast | 30.32 | 0.88 |
| IRIS_313-11762 | Indica             | Madagascar  | 27.46 | 0.88 |
| IRIS_313-11786 | Indica             | Gambia      | 31.14 | 0.87 |
| IRIS_313-11787 | Indica             | Gambia      | 21.9  | 0.85 |
| IRIS_313-11791 | Indica             | Madagascar  | 32.25 | 0.89 |
| IRIS_313-11795 | Indica             | China       | 28.3  | 0.87 |
| IRIS_313-11797 | Indica             | China       | 31.86 | 0.88 |
| IRIS_313-11798 | Indica             | China       | 26.52 | 0.87 |
| IRIS_313-11799 | Indica             | China       | 23.45 | 0.87 |
| IRIS_313-11800 | Temperate_Japonica | China       | 38.45 | 0.96 |
| IRIS_313-11801 | Indica             | China       | 43.1  | 0.89 |
| IRIS_313-11804 | Indica             | China       | 33.06 | 0.88 |
| IRIS_313-11805 | Indica             | China       | 36.96 | 0.89 |
| IRIS_313-11806 | Indica             | China       | 22.04 | 0.86 |
| IRIS_313-11811 | Indica             | Kenya       | 28.06 | 0.87 |
| IRIS_313-11812 | Indica             | Kenya       | 41.86 | 0.89 |
| IRIS_313-11813 | Indica             | Kenya       | 26.96 | 0.87 |
| IRIS_313-11814 | Indica             | Kenya       | 28.41 | 0.87 |
| IRIS_313-11815 | Indica             | Kenya       | 29.2  | 0.88 |
| IRIS_313-11816 | Indica             | Myanmar     | 21.53 | 0.86 |
| IRIS_313-11817 | Indica             | Myanmar     | 29.24 | 0.89 |
| IRIS_313-11819 | Indica             | Myanmar     | 33.9  | 0.88 |
| IRIS_313-11820 | Indica             | Myanmar     | 26.41 | 0.87 |
| IRIS_313-11821 | Indica             | India       | 35.56 | 0.88 |
| IRIS_313-11822 | Indica             | India       | 25.35 | 0.87 |
| IRIS_313-11823 | Indica             | India       | 29.28 | 0.88 |
| IRIS_313-11900 | Tropical_Japonica  | Thailand    | 23.63 | 0.92 |
| IRIS_313-11924 | Tropical_Japonica  | Thailand    | 16.18 | 0.9  |
| IRIS_313-11929 | Tropical_Japonica  | Philippines | 20.51 | 0.92 |
| IRIS_313-11994 | Tropical_Japonica  | Philippines | 18.14 | 0.9  |
| IRIS_313-12045 | Tropical_Japonica  | Indonesia   | 15.33 | 0.88 |
| IRIS_313-12058 | Indica             | Cambodia    | 26.57 | 0.88 |
| IRIS_313-12060 | Temperate_Japonica | China       | 19.58 | 0.92 |
| IRIS_313-12061 | Temperate_Japonica | China       | 17.51 | 0.92 |
| IRIS_313-12108 | Tropical_Japonica  | Malaysia    | 15.59 | 0.89 |
| IRIS_313-12129 | Tropical_Japonica  | Laos        | 16.04 | 0.9  |
| IRIS_313-12164 | Tropical_Japonica  | Cambodia    | 17.4  | 0.9  |
| IRIS_313-12228 | Tropical_Japonica  | Laos        | 19.23 | 0.91 |
| IRIS_313-12281 | Tropical_Japonica  | Madagascar  | 15.6  | 0.89 |
| IRIS_313-12321 | Tropical_Japonica  | Laos        | 15.06 | 0.87 |
| IRIS_313-12323 | Tropical_Japonica  | Laos        | 15.94 | 0.89 |
| IRIS_313-12349 | Tropical_Japonica  | Laos        | 19.97 | 0.91 |
| IRIS_313-12351 | Tropical_Japonica  | Laos        | 15.49 | 0.88 |

|               |                    |               |       |      |
|---------------|--------------------|---------------|-------|------|
| IRIS_313-7876 | Tropical_Japonica  | Philippines   | 16.11 | 0.9  |
| IRIS_313-7883 | Tropical_Japonica  | Indonesia     | 20.09 | 0.91 |
| IRIS_313-7902 | Tropical_Japonica  | Philippines   | 21.4  | 0.91 |
| IRIS_313-7909 | Tropical_Japonica  | Philippines   | 17.99 | 0.9  |
| IRIS_313-7914 | Japonica           | Ivory Coast   | 23.98 | 0.91 |
| IRIS_313-7924 | Japonica           | Bolivia       | 15.94 | 0.88 |
| IRIS_313-7933 | Tropical_Japonica  | Nepal         | 16.95 | 0.88 |
| IRIS_313-7994 | Japonica           | Madagascar    | 16.68 | 0.9  |
| IRIS_313-8010 | Tropical_Japonica  | Philippines   | 18.43 | 0.9  |
| IRIS_313-8074 | Temperate_Japonica | Australia     | 15.15 | 0.89 |
| IRIS_313-8085 | Temperate_Japonica | Spain         | 15.19 | 0.91 |
| IRIS_313-8118 | Temperate_Japonica | Portugal      | 15.42 | 0.91 |
| IRIS_313-8119 | Temperate_Japonica | Bulgaria      | 16.99 | 0.93 |
| IRIS_313-8123 | Temperate_Japonica | Portugal      | 15.35 | 0.9  |
| IRIS_313-8127 | Temperate_Japonica | Bulgaria      | 16.01 | 0.92 |
| IRIS_313-8151 | Temperate_Japonica | Portugal      | 19.45 | 0.93 |
| IRIS_313-8173 | Temperate_Japonica | United States | 20.32 | 0.9  |
| IRIS_313-8177 | Temperate_Japonica | Italy         | 15.13 | 0.91 |
| IRIS_313-8305 | Indica             | India         | 25.68 | 0.87 |
| IRIS_313-8312 | Indica             | Malaysia      | 25.78 | 0.87 |
| IRIS_313-8323 | Japonica           | United States | 17.12 | 0.91 |
| IRIS_313-8356 | Temperate_Japonica | Philippines   | 17.14 | 0.89 |
| IRIS_313-8381 | Tropical_Japonica  | Malaysia      | 15.17 | 0.9  |
| IRIS_313-8391 | Indica             | Burkina Fasso | 32.53 | 0.88 |
| IRIS_313-8407 | Indica             | Malaysia      | 22.61 | 0.86 |
| IRIS_313-8436 | Tropical_Japonica  | Indonesia     | 17.43 | 0.9  |
| IRIS_313-8493 | Indica             | Indonesia     | 33.37 | 0.88 |
| IRIS_313-8606 | Indica             | -             | 21.2  | 0.86 |
| IRIS_313-8627 | Temperate_Japonica | United States | 15.08 | 0.9  |
| IRIS_313-8703 | Indica             | Bangladesh    | 27.53 | 0.87 |
| IRIS_313-8768 | Tropical_Japonica  | Ivory Coast   | 17.27 | 0.9  |
| IRIS_313-8925 | Indica             | Sri Lanka     | 25.15 | 0.87 |
| IRIS_313-8930 | Indica             | Bangladesh    | 22.89 | 0.86 |
| IRIS_313-8948 | Indica             | Philippines   | 28.36 | 0.88 |
| IRIS_313-9020 | Indica             | Thailand      | 27.96 | 0.87 |
| IRIS_313-9023 | Indica             | India         | 25.66 | 0.87 |
| IRIS_313-9066 | Indica             | Bangladesh    | 33.64 | 0.9  |
| IRIS_313-9148 | Indica             | Bangladesh    | 26.98 | 0.87 |
| IRIS_313-9262 | Indica             | Bangladesh    | 24.49 | 0.86 |
| IRIS_313-9294 | Indica             | Gambia        | 29.43 | 0.88 |
| IRIS_313-9379 | Temperate_Japonica | South Korea   | 18.33 | 0.93 |
| IRIS_313-9409 | Indica             | Malaysia      | 22.38 | 0.87 |
| IRIS_313-9470 | Tropical_Japonica  | Indonesia     | 18.78 | 0.91 |



|                                                     |                    |             |       |      |
|-----------------------------------------------------|--------------------|-------------|-------|------|
| IRIS_313-9590                                       | Indica             | Indonesia   | 22.1  | 0.87 |
| IRIS_313-9790                                       | Temperate_Japonica | Uruguay     | 15.96 | 0.92 |
| List of the 34 removed cultivars after PCA analysis |                    |             |       |      |
| IRIS_313-10114                                      | Indica             | Burundi     | 27.45 | 0.88 |
| IRIS_313-11467                                      | Temperate_Japonica | Philippines | 16.62 | 0.84 |
| IRIS_313-11493                                      | Tropical_Japonica  | India       | 23.23 | 0.86 |
| IRIS_313-11622                                      | Tropical_Japonica  | China       | 15.71 | 0.84 |
| IRIS_313-11657                                      | Tropical_Japonica  | Nigeria     | 33.93 | 0.88 |
| IRIS_313-11671                                      | Temperate_Japonica | Nepal       | 42.84 | 0.89 |
| IRIS_313-11673                                      | Indica             | Philippines | 33.32 | 0.93 |
| IRIS_313-11674                                      | Tropical_Japonica  | Thailand    | 27.67 | 0.88 |
| IRIS_313-11691                                      | Indica             | Bhutan      | 31.45 | 0.93 |
| IRIS_313-11706                                      | Temperate_Japonica | Thailand    | 17.16 | 0.85 |
| IRIS_313-11724                                      | Temperate_Japonica | Guinea      | 24.29 | 0.87 |
| IRIS_313-11725                                      | Indica             | Japan       | 32.64 | 0.97 |
| IRIS_313-11737                                      | Indica             | India       | 30.84 | 0.89 |
| IRIS_313-11738                                      | Tropical_Japonica  | India       | 28.5  | 0.88 |
| IRIS_313-11739                                      | Indica             | Ghana       | 22.37 | 0.92 |
| IRIS_313-11747                                      | Temperate_Japonica | China       | 26.56 | 0.88 |
| IRIS_313-11754                                      | Tropical_Japonica  | Madagascar  | 32.66 | 0.91 |
| IRIS_313-11758                                      | Tropical_Japonica  | Ivory Coast | 26.23 | 0.88 |
| IRIS_313-11759                                      | Indica             | Ivory Coast | 32.78 | 0.93 |
| IRIS_313-11789                                      | Japonica           | Madagascar  | 31.67 | 0.88 |
| IRIS_313-11790                                      | Indica             | Madagascar  | 30.49 | 0.91 |
| IRIS_313-11794                                      | Tropical_Japonica  | Madagascar  | 35.43 | 0.88 |
| IRIS_313-11796                                      | Tropical_Japonica  | China       | 40.97 | 0.89 |
| IRIS_313-11802                                      | Temperate_Japonica | China       | 47.52 | 0.9  |
| IRIS_313-11809                                      | Indica             | Kenya       | 28.36 | 0.88 |
| IRIS_313-11810                                      | Tropical_Japonica  | Kenya       | 30.31 | 0.88 |
| IRIS_313-11833                                      | Tropical_Japonica  | Thailand    | 15.74 | 0.83 |
| IRIS_313-7646                                       | Tropical_Japonica  | Madagascar  | 18.6  | 0.88 |
| IRIS_313-7719                                       | Temperate_Japonica | Mali        | 16.46 | 0.84 |
| IRIS_313-7725                                       | Temperate_Japonica | Madagascar  | 16.94 | 0.85 |
| IRIS_313-7911                                       | Tropical_Japonica  | Philippines | 17.34 | 0.84 |
| IRIS_313-8864                                       | Indica             | Bangladesh  | 23.67 | 0.86 |
| IRIS_313-8911                                       | Tropical_Japonica  | Thailand    | 23.95 | 0.91 |
| IRIS_313-9160                                       | Temperate_Japonica | Senegal     | 21.46 | 0.86 |

**Supplementary Table S2** PCA value for 296 selected samples.

| <b>Sub_Group</b>   | <b>Sample</b> | <b>PCA1</b> | <b>PCA2</b> |
|--------------------|---------------|-------------|-------------|
| Temperate_Japonica | B001          | 0.0553578   | -0.0837806  |
| Temperate_Japonica | B003          | 0.0592979   | 0.0350484   |
| Temperate_Japonica | B005          | 0.0750891   | -0.0975059  |
| Temperate_Japonica | B008          | 0.0749498   | -0.101776   |
| Indica             | B012          | -0.0431574  | 0.000278129 |
| Indica             | B015          | -0.0545468  | -0.0173855  |
| Temperate_Japonica | B016          | 0.070508    | -0.0361586  |
| Temperate_Japonica | B017          | 0.0699643   | -0.0886601  |
| Tropical_Japonica  | B018          | 0.0504925   | 0.114348    |
| Temperate_Japonica | B023          | 0.055117    | -0.0812428  |
| Indica             | B026          | -0.049645   | -0.0238813  |
| Temperate_Japonica | B034          | 0.0738901   | -0.0839482  |
| Temperate_Japonica | B036          | 0.0578947   | 0.0713944   |
| Tropical_Japonica  | B043          | 0.0552332   | 0.115686    |
| Temperate_Japonica | B045          | 0.074704    | -0.102007   |
| Temperate_Japonica | B046          | 0.0747984   | -0.0952057  |
| Temperate_Japonica | B066          | 0.0708003   | -0.0881505  |
| Temperate_Japonica | B070          | 0.0591536   | 0.0562264   |
| Indica             | B097          | -0.0497525  | -0.0185254  |
| Temperate_Japonica | B100          | 0.0709517   | -0.0824973  |
| Temperate_Japonica | B111          | 0.0652985   | -0.0760201  |
| Japonica           | B143          | 0.0255563   | -0.0955038  |
| Temperate_Japonica | B160          | 0.0753173   | -0.0978473  |
| Temperate_Japonica | B162          | 0.0751332   | -0.10188    |
| Temperate_Japonica | B167          | 0.074432    | -0.104502   |
| Temperate_Japonica | B182          | 0.0748908   | -0.0921166  |
| Temperate_Japonica | B183          | 0.0738378   | -0.094511   |
| Tropical_Japonica  | B190          | 0.0509228   | 0.111715    |
| Tropical_Japonica  | B191          | 0.0482655   | 0.083739    |
| Japonica           | B196          | 0.0560336   | 0.0887642   |
| Temperate_Japonica | B204          | 0.0735831   | -0.080097   |
| Indica             | B210          | -0.0479426  | 5.96E-05    |
| Temperate_Japonica | B212          | 0.0457753   | -0.100692   |
| Indica             | B214          | -0.0542891  | -0.00868509 |
| Temperate_Japonica | B218          | 0.0733802   | -0.0931084  |
| Temperate_Japonica | B225          | 0.0688635   | -0.0794412  |
| Temperate_Japonica | B226          | 0.0747116   | -0.0884803  |
| Temperate_Japonica | B230          | 0.0650246   | -0.0412826  |
| Tropical_Japonica  | B241          | 0.0592478   | 0.0048033   |
| Temperate_Japonica | B250          | 0.0742912   | -0.0973654  |

|                    |                 |            |             |
|--------------------|-----------------|------------|-------------|
| Temperate_Japonica | B258            | 0.0707044  | -0.0490536  |
| Indica             | B261            | -0.0504085 | -0.0105025  |
| Indica             | B264            | -0.0527654 | -0.0209963  |
| Indica             | B265            | -0.053564  | -0.00983598 |
| Tropical_Japonica  | B266            | 0.0574943  | -0.0128502  |
| Temperate_Japonica | B269            | 0.075096   | -0.0961585  |
| Indica             | CX101           | -0.052692  | -0.00968679 |
| Indica             | CX102           | -0.0585018 | -0.00688339 |
| Tropical_Japonica  | CX106           | 0.0518399  | 0.109328    |
| Japonica           | CX109           | 0.039157   | 0.0440516   |
| Tropical_Japonica  | CX111           | 0.0565908  | 0.113508    |
| Japonica           | CX138           | 0.0712546  | -0.0852525  |
| Japonica           | CX139           | 0.0393394  | 0.0419352   |
| Temperate_Japonica | CX142           | 0.0623598  | 0.016713    |
| Indica             | CX147           | -0.0571931 | -0.0101755  |
| Indica             | CX150           | -0.0615407 | -0.0142942  |
| Indica             | CX152           | -0.0589525 | -0.0185201  |
| Indica             | CX154           | -0.0549844 | -0.0119224  |
| Indica             | CX155           | -0.0572223 | -0.00175081 |
| Temperate_Japonica | CX16            | 0.0712759  | -0.104451   |
| Japonica           | CX205           | 0.0539653  | 0.0368337   |
| Tropical_Japonica  | CX220           | 0.0592047  | 0.112758    |
| Indica             | CX225           | -0.0544563 | -0.00642995 |
| Japonica           | CX241           | 0.0545365  | 0.106818    |
| Japonica           | CX243           | 0.0293221  | 0.084679    |
| Japonica           | CX262           | 0.0517174  | 0.10262     |
| Tropical_Japonica  | CX269           | 0.0549607  | 0.109422    |
| Japonica           | CX285           | 0.0550781  | 0.091974    |
| Indica             | CX3             | -0.0579651 | -0.00944154 |
| Temperate_Japonica | CX306           | 0.0759967  | -0.1048     |
| Temperate_Japonica | CX315           | 0.0737345  | -0.102959   |
| Temperate_Japonica | CX329           | 0.0754838  | -0.102174   |
| Japonica           | CX353           | 0.0669716  | -0.0340765  |
| Temperate_Japonica | CX354           | 0.0578832  | -0.0406425  |
| Japonica           | CX355           | 0.0213718  | 0.0799854   |
| Temperate_Japonica | CX383           | 0.0718264  | -0.0714697  |
| Japonica           | CX389_Jinyuan85 | 0.034133   | -0.099428   |
| Temperate_Japonica | CX391           | 0.0679922  | -0.0430324  |
| Indica             | CX98            | -0.0543558 | 0.00193439  |
| Indica             | CX99            | -0.0523137 | 0.00432207  |
| Indica             | IRIS_313-10010  | -0.0566857 | 0.00225119  |
| Temperate_Japonica | IRIS_313-10097  | 0.0754002  | -0.101133   |
| Indica             | IRIS_313-10171  | -0.0498145 | -0.00506118 |

|                    |                |            |              |
|--------------------|----------------|------------|--------------|
| Indica             | IRIS_313-10177 | -0.0517861 | -0.00576283  |
| Indica             | IRIS_313-10235 | -0.0580359 | -0.00863341  |
| Temperate_Japonica | IRIS_313-10440 | 0.0693499  | -0.100843    |
| Indica             | IRIS_313-10511 | -0.0558787 | 0.0021948    |
| Tropical_Japonica  | IRIS_313-10541 | 0.0530303  | 0.106566     |
| Temperate_Japonica | IRIS_313-10563 | 0.0720384  | -0.0568305   |
| Temperate_Japonica | IRIS_313-10564 | 0.0747998  | -0.104762    |
| Temperate_Japonica | IRIS_313-10570 | 0.0747346  | -0.0939483   |
| Tropical_Japonica  | IRIS_313-10577 | 0.059167   | 0.0817225    |
| Tropical_Japonica  | IRIS_313-10578 | 0.0469837  | 0.111994     |
| Tropical_Japonica  | IRIS_313-10582 | 0.0579513  | 0.082165     |
| Indica             | IRIS_313-10609 | -0.0492196 | -0.00412033  |
| Temperate_Japonica | IRIS_313-10617 | 0.0733428  | -0.0868989   |
| Temperate_Japonica | IRIS_313-10642 | 0.0752672  | -0.104135    |
| Tropical_Japonica  | IRIS_313-10657 | 0.0543453  | 0.0033344    |
| Temperate_Japonica | IRIS_313-10677 | 0.0748161  | -0.0949095   |
| Indica             | IRIS_313-10725 | -0.0576939 | 0.00201877   |
| Japonica           | IRIS_313-10744 | 0.038653   | 0.0546729    |
| Tropical_Japonica  | IRIS_313-10793 | 0.039814   | 0.0850117    |
| Tropical_Japonica  | IRIS_313-10798 | 0.0564092  | 0.0943033    |
| Tropical_Japonica  | IRIS_313-10834 | 0.0634921  | -0.0108094   |
| Temperate_Japonica | IRIS_313-10840 | 0.0738903  | -0.0947345   |
| Indica             | IRIS_313-10857 | -0.0339276 | 0.0148662    |
| Indica             | IRIS_313-10858 | -0.0535259 | -0.000338279 |
| Indica             | IRIS_313-10863 | -0.060035  | -0.00666279  |
| Tropical_Japonica  | IRIS_313-10870 | 0.0497054  | 0.0197686    |
| Japonica           | IRIS_313-10872 | 0.0466302  | 0.0109735    |
| Temperate_Japonica | IRIS_313-10916 | 0.0705913  | -0.0491109   |
| Japonica           | IRIS_313-10918 | 0.0244849  | 0.080219     |
| Tropical_Japonica  | IRIS_313-10923 | 0.0563629  | -0.00279744  |
| Tropical_Japonica  | IRIS_313-10960 | 0.0465452  | 0.092643     |
| Indica             | IRIS_313-10975 | -0.0537634 | 0.00288543   |
| Indica             | IRIS_313-10986 | -0.0566879 | -0.00228256  |
| Japonica           | IRIS_313-10994 | 0.0444462  | 0.0984275    |
| Tropical_Japonica  | IRIS_313-10999 | 0.0494433  | 0.101523     |
| Japonica           | IRIS_313-11044 | 0.0512647  | 0.0799389    |
| Japonica           | IRIS_313-11046 | 0.047706   | 0.0905509    |
| Indica             | IRIS_313-11083 | -0.0574042 | 0.000838275  |
| Indica             | IRIS_313-11085 | -0.0525579 | -0.00387102  |
| Indica             | IRIS_313-11089 | -0.0583459 | -0.00553949  |
| Tropical_Japonica  | IRIS_313-11094 | 0.0574754  | 0.00432671   |
| Indica             | IRIS_313-11097 | -0.0443356 | 0.0207926    |
| Tropical_Japonica  | IRIS_313-11102 | 0.0532991  | 0.110689     |

|                    |                |            |              |
|--------------------|----------------|------------|--------------|
| Tropical_Japonica  | IRIS_313-11103 | 0.0625508  | 0.107482     |
| Tropical_Japonica  | IRIS_313-11104 | 0.0626754  | 0.106698     |
| Indica             | IRIS_313-11113 | -0.0558971 | 0.000926141  |
| Indica             | IRIS_313-11118 | -0.0606789 | -0.00669655  |
| Indica             | IRIS_313-11151 | -0.0591317 | -0.0155124   |
| Temperate_Japonica | IRIS_313-11202 | 0.0738187  | -0.0970006   |
| Indica             | IRIS_313-11205 | -0.0578238 | -0.00293588  |
| Indica             | IRIS_313-11229 | -0.057753  | -0.00159541  |
| Indica             | IRIS_313-11234 | -0.0560742 | 0.000871283  |
| Tropical_Japonica  | IRIS_313-11238 | 0.05046    | 0.0958324    |
| Indica             | IRIS_313-11239 | -0.0557351 | -0.0107224   |
| Indica             | IRIS_313-11241 | -0.0574763 | -0.0118873   |
| Indica             | IRIS_313-11242 | -0.0565461 | -0.00366094  |
| Indica             | IRIS_313-11244 | -0.0575098 | -0.0104994   |
| Indica             | IRIS_313-11245 | -0.0588548 | -0.00520839  |
| Indica             | IRIS_313-11247 | -0.0575922 | -0.0157561   |
| Indica             | IRIS_313-11251 | -0.0584455 | -0.0233533   |
| Indica             | IRIS_313-11253 | -0.0479907 | -0.000537322 |
| Indica             | IRIS_313-11256 | -0.057312  | -0.00232463  |
| Indica             | IRIS_313-11260 | -0.0568442 | -0.0147387   |
| Indica             | IRIS_313-11263 | -0.0353847 | -0.0267939   |
| Indica             | IRIS_313-11266 | -0.053478  | 0.00415034   |
| Indica             | IRIS_313-11267 | -0.0579543 | -0.000702487 |
| Indica             | IRIS_313-11273 | -0.0611082 | -0.00626245  |
| Indica             | IRIS_313-11279 | -0.0501163 | -1.04E-05    |
| Indica             | IRIS_313-11395 | -0.0586061 | -0.00680274  |
| Indica             | IRIS_313-11642 | -0.0561615 | 0.00135012   |
| Indica             | IRIS_313-11643 | -0.0556942 | -0.0150073   |
| Indica             | IRIS_313-11644 | -0.0510652 | -0.00212366  |
| Indica             | IRIS_313-11645 | -0.0561029 | 0.000853498  |
| Indica             | IRIS_313-11646 | -0.0577142 | 0.00428712   |
| Indica             | IRIS_313-11648 | -0.0593358 | 0.00257624   |
| Temperate_Japonica | IRIS_313-11651 | 0.0698197  | -0.0442622   |
| Temperate_Japonica | IRIS_313-11652 | 0.0738707  | -0.102249    |
| Indica             | IRIS_313-11656 | -0.0597251 | -0.0206218   |
| Tropical_Japonica  | IRIS_313-11659 | 0.0600665  | 0.104283     |
| Indica             | IRIS_313-11663 | -0.0514349 | 0.00659263   |
| Indica             | IRIS_313-11664 | -0.0618472 | -0.0170455   |
| Indica             | IRIS_313-11665 | -0.0550648 | -0.0125847   |
| Indica             | IRIS_313-11667 | -0.0599328 | -0.0129993   |
| Indica             | IRIS_313-11668 | -0.0543781 | -0.014806    |
| Indica             | IRIS_313-11669 | -0.0513419 | -0.00908779  |
| Indica             | IRIS_313-11677 | -0.0562759 | -0.0190649   |

|                   |                |            |             |
|-------------------|----------------|------------|-------------|
| Indica            | IRIS_313-11681 | -0.0603104 | -0.00479548 |
| Indica            | IRIS_313-11683 | -0.0599917 | -0.00256723 |
| Indica            | IRIS_313-11684 | -0.0591439 | 0.00333599  |
| Indica            | IRIS_313-11685 | -0.0606937 | -0.00833032 |
| Indica            | IRIS_313-11686 | -0.0598586 | -0.00636648 |
| Indica            | IRIS_313-11687 | -0.0595985 | 0.00185354  |
| Indica            | IRIS_313-11692 | -0.0576158 | -0.0218039  |
| Indica            | IRIS_313-11700 | -0.0577359 | -0.00455133 |
| Indica            | IRIS_313-11704 | -0.0602728 | -0.0141233  |
| Indica            | IRIS_313-11705 | -0.0568432 | -0.00484979 |
| Indica            | IRIS_313-11707 | -0.058911  | 0.00400947  |
| Indica            | IRIS_313-11708 | -0.0573447 | 0.00141552  |
| Indica            | IRIS_313-11709 | -0.0598309 | -0.00460157 |
| Indica            | IRIS_313-11710 | -0.0583017 | 0.00292871  |
| Indica            | IRIS_313-11716 | -0.0492343 | -0.00696437 |
| Indica            | IRIS_313-11717 | -0.0621507 | -0.0127407  |
| Indica            | IRIS_313-11719 | -0.0592369 | -0.00492915 |
| Indica            | IRIS_313-11720 | -0.0612913 | -0.00373235 |
| Indica            | IRIS_313-11721 | -0.0595883 | -0.00661976 |
| Indica            | IRIS_313-11722 | -0.0578107 | -0.00965476 |
| Indica            | IRIS_313-11723 | -0.0566344 | 0.0022187   |
| Indica            | IRIS_313-11727 | -0.053629  | -0.00875838 |
| Indica            | IRIS_313-11728 | -0.061288  | -0.0128793  |
| Indica            | IRIS_313-11730 | -0.055398  | -0.0157837  |
| Indica            | IRIS_313-11731 | -0.0573609 | -0.0125102  |
| Indica            | IRIS_313-11732 | -0.0553522 | -0.0181653  |
| Indica            | IRIS_313-11733 | -0.0509978 | -0.00923126 |
| Indica            | IRIS_313-11734 | -0.0578781 | -0.0111842  |
| Indica            | IRIS_313-11740 | -0.0589021 | -0.00840543 |
| Indica            | IRIS_313-11744 | -0.0521967 | -0.00775826 |
| Indica            | IRIS_313-11745 | -0.0534124 | -0.010481   |
| Indica            | IRIS_313-11746 | -0.0568462 | -0.0161076  |
| Indica            | IRIS_313-11748 | -0.0543389 | -0.00514679 |
| Indica            | IRIS_313-11750 | -0.0597162 | -0.0157793  |
| Indica            | IRIS_313-11751 | -0.0553875 | -0.012217   |
| Indica            | IRIS_313-11752 | -0.0566537 | -0.0219159  |
| Tropical_Japonica | IRIS_313-11755 | 0.0603581  | 0.10997     |
| Indica            | IRIS_313-11757 | -0.056698  | -0.0157651  |
| Indica            | IRIS_313-11760 | -0.0579491 | 0.00719809  |
| Indica            | IRIS_313-11761 | -0.0563424 | 0.00601944  |
| Indica            | IRIS_313-11762 | -0.0567875 | -0.00205294 |
| Indica            | IRIS_313-11786 | -0.0604147 | -0.00403758 |
| Indica            | IRIS_313-11787 | -0.052267  | 0.00100423  |

|                    |                |            |              |
|--------------------|----------------|------------|--------------|
| Indica             | IRIS_313-11791 | -0.0314547 | 0.0218892    |
| Indica             | IRIS_313-11795 | -0.05596   | -0.0137011   |
| Indica             | IRIS_313-11797 | -0.0519455 | -0.00799381  |
| Indica             | IRIS_313-11798 | -0.0547223 | -0.00437122  |
| Indica             | IRIS_313-11799 | -0.053409  | -0.009285    |
| Temperate_Japonica | IRIS_313-11800 | 0.0746104  | -0.102219    |
| Indica             | IRIS_313-11801 | -0.0603157 | -0.0222415   |
| Indica             | IRIS_313-11804 | -0.054683  | -0.0249345   |
| Indica             | IRIS_313-11805 | -0.0549679 | -0.0044708   |
| Indica             | IRIS_313-11806 | -0.0535828 | -0.0160361   |
| Indica             | IRIS_313-11811 | -0.0567326 | 0.00628478   |
| Indica             | IRIS_313-11812 | -0.0572521 | 0.00254312   |
| Indica             | IRIS_313-11813 | -0.0558333 | 0.00587243   |
| Indica             | IRIS_313-11814 | -0.0582361 | -0.000435592 |
| Indica             | IRIS_313-11815 | -0.057031  | 0.00411998   |
| Indica             | IRIS_313-11816 | -0.0572215 | -0.00643219  |
| Indica             | IRIS_313-11817 | -0.0555537 | -0.00678458  |
| Indica             | IRIS_313-11819 | -0.0641193 | -0.0140953   |
| Indica             | IRIS_313-11820 | -0.058612  | -0.00742026  |
| Indica             | IRIS_313-11821 | -0.0566843 | -0.0018108   |
| Indica             | IRIS_313-11822 | -0.0556755 | -0.00118854  |
| Indica             | IRIS_313-11823 | -0.0589058 | 0.00131304   |
| Tropical_Japonica  | IRIS_313-11900 | 0.0595196  | -0.0330738   |
| Tropical_Japonica  | IRIS_313-11924 | 0.0651088  | -0.0241984   |
| Tropical_Japonica  | IRIS_313-11929 | 0.0541067  | 0.104344     |
| Tropical_Japonica  | IRIS_313-11994 | 0.04663    | 0.11671      |
| Tropical_Japonica  | IRIS_313-12045 | 0.0550256  | 0.103727     |
| Indica             | IRIS_313-12058 | -0.0592107 | -7.18E-05    |
| Temperate_Japonica | IRIS_313-12060 | 0.07373    | -0.0806585   |
| Temperate_Japonica | IRIS_313-12061 | 0.0751204  | -0.0918919   |
| Tropical_Japonica  | IRIS_313-12108 | 0.0504326  | 0.101653     |
| Tropical_Japonica  | IRIS_313-12129 | 0.0559572  | 0.00157865   |
| Tropical_Japonica  | IRIS_313-12164 | 0.0474951  | 0.0718551    |
| Tropical_Japonica  | IRIS_313-12228 | 0.0604452  | -0.00506658  |
| Tropical_Japonica  | IRIS_313-12281 | 0.0561766  | 0.100394     |
| Tropical_Japonica  | IRIS_313-12321 | 0.0596933  | -0.0089248   |
| Tropical_Japonica  | IRIS_313-12323 | 0.058124   | -0.00353759  |
| Tropical_Japonica  | IRIS_313-12349 | 0.063295   | -0.00453674  |
| Tropical_Japonica  | IRIS_313-12351 | 0.0560225  | -0.0170174   |
| Tropical_Japonica  | IRIS_313-7876  | 0.0485999  | 0.0994248    |
| Tropical_Japonica  | IRIS_313-7883  | 0.0535622  | 0.079601     |
| Tropical_Japonica  | IRIS_313-7902  | 0.0360053  | 0.08642      |
| Tropical_Japonica  | IRIS_313-7909  | 0.0245093  | 0.0765802    |

|                    |               |            |              |
|--------------------|---------------|------------|--------------|
| Japonica           | IRIS_313-7914 | 0.0567871  | 0.122256     |
| Japonica           | IRIS_313-7924 | 0.0265791  | 0.0791213    |
| Tropical_Japonica  | IRIS_313-7933 | 0.0367327  | 0.0214813    |
| Japonica           | IRIS_313-7994 | 0.0538843  | 0.105356     |
| Tropical_Japonica  | IRIS_313-8010 | 0.0487738  | 0.0960284    |
| Temperate_Japonica | IRIS_313-8074 | 0.0497948  | 0.100865     |
| Temperate_Japonica | IRIS_313-8085 | 0.0690618  | -0.00920522  |
| Temperate_Japonica | IRIS_313-8118 | 0.0604798  | -0.0689123   |
| Temperate_Japonica | IRIS_313-8119 | 0.0674865  | -0.0485043   |
| Temperate_Japonica | IRIS_313-8123 | 0.0658046  | -0.0282324   |
| Temperate_Japonica | IRIS_313-8127 | 0.0694884  | -0.0491367   |
| Temperate_Japonica | IRIS_313-8151 | 0.0664929  | -0.0219813   |
| Temperate_Japonica | IRIS_313-8173 | 0.029693   | 0.0637315    |
| Temperate_Japonica | IRIS_313-8177 | 0.0567926  | 0.0484628    |
| Indica             | IRIS_313-8305 | -0.0562662 | 0.0012962    |
| Indica             | IRIS_313-8312 | -0.054437  | 0.00452076   |
| Japonica           | IRIS_313-8323 | 0.0538997  | 0.111495     |
| Temperate_Japonica | IRIS_313-8356 | 0.0594771  | 0.0960561    |
| Tropical_Japonica  | IRIS_313-8381 | 0.0581262  | 0.0976409    |
| Indica             | IRIS_313-8391 | -0.0543319 | 0.0015152    |
| Indica             | IRIS_313-8407 | -0.0586781 | -0.000340163 |
| Tropical_Japonica  | IRIS_313-8436 | 0.0429839  | 0.0665321    |
| Indica             | IRIS_313-8493 | -0.0601908 | -0.00734127  |
| Indica             | IRIS_313-8606 | -0.0550944 | 0.00249484   |
| Temperate_Japonica | IRIS_313-8627 | 0.0560226  | 0.0927706    |
| Indica             | IRIS_313-8703 | -0.0572143 | -0.00371984  |
| Tropical_Japonica  | IRIS_313-8768 | 0.0498886  | 0.106088     |
| Indica             | IRIS_313-8925 | -0.0540726 | -8.05E-05    |
| Indica             | IRIS_313-8930 | -0.0603432 | -0.0096649   |
| Indica             | IRIS_313-8948 | -0.0572042 | -0.00518127  |
| Indica             | IRIS_313-9020 | -0.0597627 | -0.0019242   |
| Indica             | IRIS_313-9023 | -0.0536344 | -0.020832    |
| Indica             | IRIS_313-9066 | -0.0341119 | 0.0277044    |
| Indica             | IRIS_313-9148 | -0.0573562 | -0.00666078  |
| Indica             | IRIS_313-9262 | -0.0585375 | 0.00372362   |
| Indica             | IRIS_313-9294 | -0.0541136 | 0.00224468   |
| Temperate_Japonica | IRIS_313-9379 | 0.0728289  | -0.0737546   |
| Indica             | IRIS_313-9409 | -0.0574398 | 0.00187411   |
| Tropical_Japonica  | IRIS_313-9470 | 0.0526664  | 0.0873372    |
| Indica             | IRIS_313-9590 | -0.0566248 | 0.00422653   |
| Temperate_Japonica | IRIS_313-9790 | 0.0573546  | 0.0372686    |



**Supplementary Table S3** List of African cultivated rice (*O. glaberrima*) and wild rice (*O. rufipogon* and *O. nivara*) used to generate phylogenetic tree.

| Sample ID      | Data Source                                                      | Species             | Origin Place              | Depth | Coverage <sup>1</sup> |
|----------------|------------------------------------------------------------------|---------------------|---------------------------|-------|-----------------------|
| IRGC88812      | Zhang et al.,2014                                                | <i>O. nivara</i>    | Laos                      | 68.61 | 0.99                  |
| MV 89-80       | Xu et al.,2011                                                   | <i>O. nivara</i>    | Medinipur, India          | 18.55 | 0.96                  |
| HK 47          | Xu et al.,2011                                                   | <i>O. nivara</i>    | Madhya Pradesh, India     | 15.78 | 0.95                  |
| 042/87/34      | Xu et al.,2011                                                   | <i>O. nivara</i>    | Dhoni, India              | 19.22 | 0.98                  |
| CA 97-053      | Xu et al.,2011                                                   | <i>O. nivara</i>    | Sopoir Tep, Cambodia      | 16.86 | 0.97                  |
| L 89-12        | Xu et al.,2011                                                   | <i>O. nivara</i>    | Vientiane, Laos           | 17.41 | 0.96                  |
| VOC4           | Xu et al.,2011                                                   | <i>O. rufipogon</i> | Nepal                     | 18.85 | 0.98                  |
| Yuan 3-9       | Xu et al.,2011                                                   | <i>O. rufipogon</i> | Yunnan,China              | 13.57 | 0.94                  |
| DAL DHAN       | Xu et al.,2011                                                   | <i>O. rufipogon</i> | Chakaria, Bangladesh      | 19.21 | 0.98                  |
| P46            | Xu et al.,2011                                                   | <i>O. rufipogon</i> | Hainan, China, China      | 15.32 | 0.97                  |
| PADI<br>PADIAN | Xu et al.,2011                                                   | <i>O. rufipogon</i> | Kromat Watu,<br>Indonesia | 17.32 | 0.96                  |
| W1943          | Xu et al.,2011,<br>Ohyanagi et al.,2016<br>and Yang et al., 2012 | <i>O. rufipogon</i> | Jiangxi, China            | 20.8  | 0.97                  |
| W3105          | Huang et al.,2012                                                | <i>O. rufipogon</i> | India                     | 40    | 0.86                  |
| W1559          | Huang et al.,2012                                                | <i>O. rufipogon</i> | Thailand                  | 4.35  | 0.06                  |
| W3072          | Huang et al.,2012                                                | <i>O. rufipogon</i> | Hainan, China             | 4.73  | 0.16                  |
| W1087          | Huang et al.,2012                                                | <i>O. rufipogon</i> | India                     | 6.25  | 0.41                  |
| W1093          | Huang et al.,2012                                                | <i>O. rufipogon</i> | India                     | 5.09  | 0.14                  |
| W1096          | Huang et al.,2012                                                | <i>O. rufipogon</i> | India                     | 4.84  | 0.09                  |
| W1683          | Huang et al.,2012                                                | <i>O. rufipogon</i> | India                     | 6.75  | 0.5                   |
| W2022          | Huang et al.,2012                                                | <i>O. rufipogon</i> | Indonesia                 | 4.27  | 0.06                  |
| W2024          | Huang et al.,2012                                                | <i>O. rufipogon</i> | Indonesia                 | 4.38  | 0.09                  |
| W0171          | Huang et al.,2012                                                | <i>O. rufipogon</i> | Thailand                  | 6.07  | 0.48                  |
| W1790          | Huang et al.,2012                                                | <i>O. rufipogon</i> | Thailand                  | 6.72  | 0.5                   |
| W1849          | Huang et al.,2012                                                | <i>O. rufipogon</i> | Thailand                  | 9.77  | 0.87                  |
| W1850          | Huang et al.,2012                                                | <i>O. rufipogon</i> | Thailand                  | 4.57  | 0.12                  |
| W1854          | Huang et al.,2012                                                | <i>O. rufipogon</i> | Thailand                  | 4.73  | 0.14                  |
| W1859          | Huang et al.,2012                                                | <i>O. rufipogon</i> | Thailand                  | 4.65  | 0.16                  |
| W1870          | Huang et al.,2012                                                | <i>O. rufipogon</i> | Thailand                  | 4.18  | 0.07                  |
| W1940          | Huang et al.,2012                                                | <i>O. rufipogon</i> | Thailand                  | 5.04  | 0.29                  |
| W2282          | Huang et al.,2012                                                | <i>O. rufipogon</i> | Thailand                  | 4.9   | 0.03                  |
| W1715          | Huang et al.,2012                                                | <i>O. rufipogon</i> | China                     | 5.04  | 0.22                  |
| W2198          | Huang et al.,2012                                                | <i>O. rufipogon</i> | China                     | 4.36  | 0.08                  |
| W3046          | Huang et al.,2012                                                | <i>O. rufipogon</i> | Guangdong, China          | 5.1   | 0.15                  |
| W3048          | Huang et al.,2012                                                | <i>O. rufipogon</i> | Guangxi, China            | 4.58  | 0.08                  |
| W3065          | Huang et al.,2012                                                | <i>O. rufipogon</i> | Hainan, China             | 4.02  | 0.08                  |

|            |                   |                      |                     |        |      |
|------------|-------------------|----------------------|---------------------|--------|------|
| W3070      | Huang et al.,2012 | <i>O. rufipogon</i>  | Hainan, China       | 4.16   | 0.09 |
| W1748      | Huang et al.,2012 | <i>O. rufipogon</i>  | India               | 6.41   | 0.5  |
| W1777      | Huang et al.,2012 | <i>O. rufipogon</i>  | India               | 4.84   | 0.14 |
| W1725      | Huang et al.,2012 | <i>O. rufipogon</i>  | Thailand            | 6.92   | 0.52 |
| IRGC101049 | Wang et al.2014   | <i>O. glaberrima</i> | Senegal,Africa      | 116.74 | 0.98 |
| IRGC103469 | Wang et al.2014   | <i>O. glaberrima</i> | Burkina Faso,Africa | 11.85  | 0.87 |
| IRGC103472 | Wang et al.2014   | <i>O. glaberrima</i> | Burkina Faso,Africa | 11.92  | 0.85 |
| IRGC103520 | Wang et al.2014   | <i>O. glaberrima</i> | Mali,Africa         | 16.04  | 0.88 |
| IRGC103632 | Wang et al.2014   | <i>O. glaberrima</i> | Mali,Africa         | 11.69  | 0.84 |
| IRGC103937 | Wang et al.2014   | <i>O. glaberrima</i> | Liberia,Africa      | 11.15  | 0.85 |
| IRGC104206 | Wang et al.2014   | <i>O. glaberrima</i> | Ghana,Africa        | 11.37  | 0.84 |
| IRGC104574 | Wang et al.2014   | <i>O. glaberrima</i> | Mali,Africa         | 8.37   | 0.78 |
| IRGC104955 | Wang et al.2014   | <i>O. glaberrima</i> | Sierra Leone,Africa | 7.01   | 0.75 |
| IRGC67563  | Wang et al.2014   | <i>O. glaberrima</i> | Ghana,Africa        | 117.87 | 0.98 |
| IRGC68939  | Wang et al.2014   | <i>O. glaberrima</i> | Madagascar,Africa   | 118.03 | 0.98 |
| IRGC68976  | Wang et al.2014   | <i>O. glaberrima</i> | Guyana,Africa       | 113.12 | 0.98 |
| IRGC75500  | Wang et al.2014   | <i>O. glaberrima</i> | Burkina Faso,Africa | 110.92 | 0.98 |
| IRGC96841  | Wang et al.2014   | <i>O. glaberrima</i> | Zimbabwe,Africa     | 120.34 | 0.98 |
| TOG5457    | Wang et al.2014   | <i>O. glaberrima</i> | Nigeria,Africa      | 9.38   | 0.83 |
| TOG5467    | Wang et al.2014   | <i>O. glaberrima</i> | Nigeria,Africa      | 13.86  | 0.89 |
| TOG5923    | Wang et al.2014   | <i>O. glaberrima</i> | Liberia,Africa      | 5.93   | 0.64 |
| TOG5949    | Wang et al.2014   | <i>O. glaberrima</i> | Liberia,Africa      | 7.58   | 0.77 |
| TOG7025    | Wang et al.2014   | <i>O. glaberrima</i> | Sierra Leone,Africa | 11.58  | 0.86 |
| TOG7102    | Wang et al.2014   | <i>O. glaberrima</i> | Mali,Africa         | 6.07   | 0.62 |

1. The percentage of the genome regions that covered by over 5 reads.

**Huang X, Kurata N, Wei X, Wang ZX, Wang A, Zhao Q, Zhao Y, Liu K, Lu H, Li W, et al. 2012.** A map of rice genome variation reveals the origin of cultivated rice. *Nature* **490**(7421): 497-501.

**Ohyanagi, H., Ebata, T., Huang, X., Gong, H., Fujita, M., Mochizuki, T., Toyoda, A., Fujiyama, A., Kaminuma, E., Nakamura, Y., et al. 2016.** OryzaGenome: Genome Diversity Database of Wild Oryza Species. *Plant Cell Physiology* **57** (1):e1.

**Wang M, Yu Y, Haberer G, Marri PR, Fan C, Goicoechea JL, Zuccolo A, Song X, Kudrna D, Ammiraju JS, et al. 2014.** The genome sequence of African rice (*Oryza glaberrima*) and evidence for independent domestication. *Nat Genet* **46**(9): 982-988.

**Xu X, Liu X, Ge S, Jensen JD, Hu F, Li X, Dong Y, Gutenkunst RN, Fang L, Huang L, et al. 2012.** Resequencing 50 accessions of cultivated and wild rice yields markers for identifying agronomically important genes. *Nature Biotechnology* **30**(1): 105-111

**Yang CC, Kawahara Y, Mizuno H, Wu J, Matsumoto T, Itoh T. 2012.** Independent domestication of Asian rice followed by gene flow from *japonica* to *indica*. *Mol Biol Evol* **29**(5): 1471-1479.

**Zhang QJ, Zhu T, Xia EH, Shi C, Liu YL, Zhang Y, Liu Y, Jiang WK, Zhao YJ, Mao SY, et al. 2014.** Rapid diversification of five *Oryza* AA genomes associated with rice adaptation. *Proc Natl Acad Sci U S A* **111**(46): E4954-4962.

**Table S4** List of wild rice obtained from Huang et al. used in this project

| Sample | Species             | Clade <sup>1</sup> | Original producing area | Depth |
|--------|---------------------|--------------------|-------------------------|-------|
| W0610  | <i>O. rufipogon</i> | Or-I               | Burma                   | 0.71  |
| W0626  | <i>O. rufipogon</i> | Or-I               | Burma                   | 2.03  |
| W0627  | <i>O. rufipogon</i> | Or-I               | Burma                   | 1.29  |
| W0630  | <i>O. rufipogon</i> | Or-I               | Burma                   | 0.81  |
| W0631  | <i>O. rufipogon</i> | Or-I               | Burma                   | 0.52  |
| W0632  | <i>O. rufipogon</i> | Or-I               | Burma                   | 1.28  |
| W0633  | <i>O. rufipogon</i> | Or-I               | Burma                   | 0.5   |
| W0638  | <i>O. rufipogon</i> | Or-I               | Burma                   | 1.25  |
| W0639  | <i>O. rufipogon</i> | Or-I               | Burma                   | 0.67  |
| W1295  | <i>O. rufipogon</i> | Or-I               | Cambodia                | 1.07  |
| W2263  | <i>O. rufipogon</i> | Or-I               | Cambodia                | 1.8   |
| W2296  | <i>O. rufipogon</i> | Or-I               | Cambodia                | 1.43  |
| W0101  | <i>O. rufipogon</i> | Or-I               | India                   | 1.42  |
| W0102  | <i>O. rufipogon</i> | Or-I               | India                   | 1.4   |
| W0103  | <i>O. rufipogon</i> | Or-I               | India                   | 1.18  |
| W0106  | <i>O. rufipogon</i> | Or-I               | India                   | 1.81  |
| W0107  | <i>O. rufipogon</i> | Or-I               | India                   | 1.93  |
| W0121  | <i>O. rufipogon</i> | Or-I               | India                   | 1.11  |
| W0123  | <i>O. rufipogon</i> | Or-I               | India                   | 0.26  |
| W0124  | <i>O. rufipogon</i> | Or-I               | India                   | 1.07  |
| W0128  | <i>O. rufipogon</i> | Or-I               | India                   | 2.41  |
| W0130  | <i>O. rufipogon</i> | Or-I               | India                   | 1.07  |
| W0147  | <i>O. rufipogon</i> | Or-I               | India                   | 0.21  |
| W0148  | <i>O. rufipogon</i> | Or-I               | India                   | 1.55  |
| W0151  | <i>O. rufipogon</i> | Or-I               | India                   | 1.94  |
| W0152  | <i>O. rufipogon</i> | Or-I               | India                   | 1.73  |
| W1080  | <i>O. rufipogon</i> | Or-I               | India                   | 1.54  |
| W1082  | <i>O. rufipogon</i> | Or-I               | India                   | 1.42  |
| W1083  | <i>O. rufipogon</i> | Or-I               | India                   | 1.37  |
| W1084  | <i>O. rufipogon</i> | Or-I               | India                   | 1.6   |
| W1086  | <i>O. rufipogon</i> | Or-I               | India                   | 1.49  |
| W1090  | <i>O. rufipogon</i> | Or-I               | India                   | 0.26  |
| W1092  | <i>O. rufipogon</i> | Or-I               | India                   | 1.25  |
| W1105  | <i>O. rufipogon</i> | Or-I               | India                   | 1.5   |
| W1107  | <i>O. rufipogon</i> | Or-I               | India                   | 1.59  |
| W1111  | <i>O. rufipogon</i> | Or-I               | India                   | 1.82  |
| W1112  | <i>O. rufipogon</i> | Or-I               | India                   | 0.76  |
| W1117  | <i>O. rufipogon</i> | Or-I               | India                   | 1.58  |
| W1121  | <i>O. rufipogon</i> | Or-I               | India                   | 1.17  |

|       |                     |      |           |      |
|-------|---------------------|------|-----------|------|
| W1142 | <i>O. rufipogon</i> | Or-I | India     | 1.05 |
| W1143 | <i>O. rufipogon</i> | Or-I | India     | 0.76 |
| W1532 | <i>O. rufipogon</i> | Or-I | India     | 0.92 |
| W1533 | <i>O. rufipogon</i> | Or-I | India     | 0.89 |
| W1666 | <i>O. rufipogon</i> | Or-I | India     | 0.68 |
| W1675 | <i>O. rufipogon</i> | Or-I | India     | 1.14 |
| W1676 | <i>O. rufipogon</i> | Or-I | India     | 1.12 |
| W1677 | <i>O. rufipogon</i> | Or-I | India     | 2.61 |
| W1679 | <i>O. rufipogon</i> | Or-I | India     | 1.36 |
| W1681 | <i>O. rufipogon</i> | Or-I | India     | 0.9  |
| W1685 | <i>O. rufipogon</i> | Or-I | India     | 1.51 |
| W1731 | <i>O. rufipogon</i> | Or-I | India     | 1.51 |
| W1735 | <i>O. rufipogon</i> | Or-I | India     | 1.71 |
| W1737 | <i>O. rufipogon</i> | Or-I | India     | 1.14 |
| W1738 | <i>O. rufipogon</i> | Or-I | India     | 1.91 |
| W1740 | <i>O. rufipogon</i> | Or-I | India     | 2.02 |
| W1741 | <i>O. rufipogon</i> | Or-I | India     | 1.33 |
| W1743 | <i>O. rufipogon</i> | Or-I | India     | 1.09 |
| W1747 | <i>O. rufipogon</i> | Or-I | India     | 1.34 |
| W1749 | <i>O. rufipogon</i> | Or-I | India     | 1.33 |
| W1750 | <i>O. rufipogon</i> | Or-I | India     | 1.96 |
| W1751 | <i>O. rufipogon</i> | Or-I | India     | 0.72 |
| W1753 | <i>O. rufipogon</i> | Or-I | India     | 1.46 |
| W1754 | <i>O. rufipogon</i> | Or-I | India     | 2.11 |
| W1756 | <i>O. rufipogon</i> | Or-I | India     | 1.08 |
| W1757 | <i>O. rufipogon</i> | Or-I | India     | 3.79 |
| W1761 | <i>O. rufipogon</i> | Or-I | India     | 1.22 |
| W1762 | <i>O. rufipogon</i> | Or-I | India     | 0.88 |
| W1770 | <i>O. rufipogon</i> | Or-I | India     | 1.11 |
| W1983 | <i>O. rufipogon</i> | Or-I | India     | 2.04 |
| W2193 | <i>O. rufipogon</i> | Or-I | India     | 1.54 |
| W3105 | <i>O. rufipogon</i> | Or-I | India     | 40   |
| W1970 | <i>O. rufipogon</i> | Or-I | Indonesia | 1.53 |
| W2265 | <i>O. rufipogon</i> | Or-I | Laos      | 3.58 |
| W2298 | <i>O. rufipogon</i> | Or-I | Laos      | 0.89 |
| W2299 | <i>O. rufipogon</i> | Or-I | Laos      | 1.45 |
| W2301 | <i>O. rufipogon</i> | Or-I | Laos      | 1.96 |
| W2302 | <i>O. rufipogon</i> | Or-I | Laos      | 2.55 |
| W2303 | <i>O. rufipogon</i> | Or-I | Laos      | 1.5  |
| W2304 | <i>O. rufipogon</i> | Or-I | Laos      | 2.66 |
| W2305 | <i>O. rufipogon</i> | Or-I | Laos      | 1.64 |
| W2306 | <i>O. rufipogon</i> | Or-I | Laos      | 3.15 |
| W2307 | <i>O. rufipogon</i> | Or-I | Laos      | 2.53 |

|       |                     |      |          |      |
|-------|---------------------|------|----------|------|
| W0574 | <i>O. rufipogon</i> | Or-I | Malaya   | 2.38 |
| W0589 | <i>O. rufipogon</i> | Or-I | Malaya   | 1.21 |
| W0590 | <i>O. rufipogon</i> | Or-I | Malaya   | 1.94 |
| W0605 | <i>O. rufipogon</i> | Or-I | Malaya   | 0.9  |
| W0168 | <i>O. rufipogon</i> | Or-I | Thailand | 1.57 |
| W0170 | <i>O. rufipogon</i> | Or-I | Thailand | 1.84 |
| W0173 | <i>O. rufipogon</i> | Or-I | Thailand | 1.92 |
| W0176 | <i>O. rufipogon</i> | Or-I | Thailand | 1.39 |
| W0178 | <i>O. rufipogon</i> | Or-I | Thailand | 1.06 |
| W0179 | <i>O. rufipogon</i> | Or-I | Thailand | 1.08 |
| W1546 | <i>O. rufipogon</i> | Or-I | Thailand | 1.09 |
| W1547 | <i>O. rufipogon</i> | Or-I | Thailand | 1.67 |
| W1551 | <i>O. rufipogon</i> | Or-I | Thailand | 1.53 |
| W1559 | <i>O. rufipogon</i> | Or-I | Thailand | 4.35 |
| W1619 | <i>O. rufipogon</i> | Or-I | Thailand | 0.99 |
| W1690 | <i>O. rufipogon</i> | Or-I | Thailand | 1.42 |
| W1695 | <i>O. rufipogon</i> | Or-I | Thailand | 1.16 |
| W1696 | <i>O. rufipogon</i> | Or-I | Thailand | 0.67 |
| W1698 | <i>O. rufipogon</i> | Or-I | Thailand | 1.63 |
| W1700 | <i>O. rufipogon</i> | Or-I | Thailand | 1.08 |
| W1726 | <i>O. rufipogon</i> | Or-I | Thailand | 1.31 |
| W1727 | <i>O. rufipogon</i> | Or-I | Thailand | 1.44 |
| W1787 | <i>O. rufipogon</i> | Or-I | Thailand | 1.76 |
| W1788 | <i>O. rufipogon</i> | Or-I | Thailand | 2.95 |
| W1792 | <i>O. rufipogon</i> | Or-I | Thailand | 2.71 |
| W1794 | <i>O. rufipogon</i> | Or-I | Thailand | 1.89 |
| W1795 | <i>O. rufipogon</i> | Or-I | Thailand | 2.07 |
| W1832 | <i>O. rufipogon</i> | Or-I | Thailand | 1.56 |
| W1852 | <i>O. rufipogon</i> | Or-I | Thailand | 1.57 |
| W1853 | <i>O. rufipogon</i> | Or-I | Thailand | 1.38 |
| W1865 | <i>O. rufipogon</i> | Or-I | Thailand | 1.32 |
| W1866 | <i>O. rufipogon</i> | Or-I | Thailand | 1.62 |
| W1879 | <i>O. rufipogon</i> | Or-I | Thailand | 1.4  |
| W1881 | <i>O. rufipogon</i> | Or-I | Thailand | 1.35 |
| W1893 | <i>O. rufipogon</i> | Or-I | Thailand | 1.59 |
| W1912 | <i>O. rufipogon</i> | Or-I | Thailand | 1.75 |
| W1914 | <i>O. rufipogon</i> | Or-I | Thailand | 3.12 |
| W1921 | <i>O. rufipogon</i> | Or-I | Thailand | 1.25 |
| W1925 | <i>O. rufipogon</i> | Or-I | Thailand | 1.23 |
| W1928 | <i>O. rufipogon</i> | Or-I | Thailand | 1.29 |
| W1935 | <i>O. rufipogon</i> | Or-I | Thailand | 0.97 |
| W2268 | <i>O. rufipogon</i> | Or-I | Thailand | 1.71 |
| W2269 | <i>O. rufipogon</i> | Or-I | Thailand | 1.18 |

|       |                     |       |                  |      |
|-------|---------------------|-------|------------------|------|
| W2271 | <i>O. rufipogon</i> | Or-I  | Thailand         | 1.61 |
| W2275 | <i>O. rufipogon</i> | Or-I  | Thailand         | 0.93 |
| W2277 | <i>O. rufipogon</i> | Or-I  | Thailand         | 1.28 |
| W2278 | <i>O. rufipogon</i> | Or-I  | Thailand         | 2.73 |
| W0624 | <i>O. rufipogon</i> | Or-II | Burma            | 0.77 |
| W0628 | <i>O. rufipogon</i> | Or-II | Burma            | 2.31 |
| W0634 | <i>O. rufipogon</i> | Or-II | Burma            | 1.13 |
| W0635 | <i>O. rufipogon</i> | Or-II | Burma            | 0.52 |
| W2288 | <i>O. rufipogon</i> | Or-II | Cambodia         | 2.8  |
| W3003 | <i>O. rufipogon</i> | Or-II | Guangdong, China | 0.39 |
| W3067 | <i>O. rufipogon</i> | Or-II | Hainan, China    | 3.7  |
| W3068 | <i>O. rufipogon</i> | Or-II | Hainan, China    | 1.75 |
| W3072 | <i>O. rufipogon</i> | Or-II | Hainan, China    | 4.73 |
| W0108 | <i>O. rufipogon</i> | Or-II | India            | 1.79 |
| W0120 | <i>O. rufipogon</i> | Or-II | India            | 0.97 |
| W0132 | <i>O. rufipogon</i> | Or-II | India            | 1.4  |
| W0157 | <i>O. rufipogon</i> | Or-II | India            | 1.2  |
| W1087 | <i>O. rufipogon</i> | Or-II | India            | 6.25 |
| W1093 | <i>O. rufipogon</i> | Or-II | India            | 5.09 |
| W1096 | <i>O. rufipogon</i> | Or-II | India            | 4.84 |
| W1122 | <i>O. rufipogon</i> | Or-II | India            | 3.48 |
| W1124 | <i>O. rufipogon</i> | Or-II | India            | 3.1  |
| W1126 | <i>O. rufipogon</i> | Or-II | India            | 2.85 |
| W1683 | <i>O. rufipogon</i> | Or-II | India            | 6.75 |
| W1687 | <i>O. rufipogon</i> | Or-II | India            | 2.31 |
| W1736 | <i>O. rufipogon</i> | Or-II | India            | 1.63 |
| W1742 | <i>O. rufipogon</i> | Or-II | India            | 1.61 |
| W1780 | <i>O. rufipogon</i> | Or-II | India            | 2.32 |
| W1292 | <i>O. rufipogon</i> | Or-II | Indonesia        | 0.98 |
| W1971 | <i>O. rufipogon</i> | Or-II | Indonesia        | 1.88 |
| W1972 | <i>O. rufipogon</i> | Or-II | Indonesia        | 2.71 |
| W1974 | <i>O. rufipogon</i> | Or-II | Indonesia        | 2.16 |
| W1975 | <i>O. rufipogon</i> | Or-II | Indonesia        | 2.74 |
| W1976 | <i>O. rufipogon</i> | Or-II | Indonesia        | 1.83 |
| W1977 | <i>O. rufipogon</i> | Or-II | Indonesia        | 3.98 |
| W1978 | <i>O. rufipogon</i> | Or-II | Indonesia        | 1.99 |
| W1979 | <i>O. rufipogon</i> | Or-II | Indonesia        | 2.27 |
| W1981 | <i>O. rufipogon</i> | Or-II | Indonesia        | 1.36 |
| W2017 | <i>O. rufipogon</i> | Or-II | Indonesia        | 2.62 |
| W2021 | <i>O. rufipogon</i> | Or-II | Indonesia        | 2.64 |
| W2022 | <i>O. rufipogon</i> | Or-II | Indonesia        | 4.27 |
| W2024 | <i>O. rufipogon</i> | Or-II | Indonesia        | 4.38 |
| W2025 | <i>O. rufipogon</i> | Or-II | Indonesia        | 1.21 |

|       |                     |       |           |      |
|-------|---------------------|-------|-----------|------|
| W2030 | <i>O. rufipogon</i> | Or-II | Indonesia | 2.47 |
| W2197 | <i>O. rufipogon</i> | Or-II | Indonesia | 3.63 |
| W2266 | <i>O. rufipogon</i> | Or-II | Laos      | 1.47 |
| W2308 | <i>O. rufipogon</i> | Or-II | Laos      | 2.47 |
| W2310 | <i>O. rufipogon</i> | Or-II | Laos      | 2.28 |
| W2311 | <i>O. rufipogon</i> | Or-II | Laos      | 2.35 |
| W0576 | <i>O. rufipogon</i> | Or-II | Malaya    | 3.69 |
| W0587 | <i>O. rufipogon</i> | Or-II | Malaya    | 1.37 |
| W0594 | <i>O. rufipogon</i> | Or-II | Malaya    | 1.37 |
| W0596 | <i>O. rufipogon</i> | Or-II | Malaya    | 1.06 |
| W0600 | <i>O. rufipogon</i> | Or-II | Malaya    | 0.97 |
| W0606 | <i>O. rufipogon</i> | Or-II | Malaya    | 1.18 |
| W0145 | <i>O. rufipogon</i> | Or-II | Thailand  | 0.31 |
| W0163 | <i>O. rufipogon</i> | Or-II | Thailand  | 3.38 |
| W0164 | <i>O. rufipogon</i> | Or-II | Thailand  | 1.58 |
| W0165 | <i>O. rufipogon</i> | Or-II | Thailand  | 1.09 |
| W0166 | <i>O. rufipogon</i> | Or-II | Thailand  | 0.76 |
| W0169 | <i>O. rufipogon</i> | Or-II | Thailand  | 1.12 |
| W0171 | <i>O. rufipogon</i> | Or-II | Thailand  | 6.07 |
| W0174 | <i>O. rufipogon</i> | Or-II | Thailand  | 3.07 |
| W0175 | <i>O. rufipogon</i> | Or-II | Thailand  | 3.68 |
| W0180 | <i>O. rufipogon</i> | Or-II | Thailand  | 3.32 |
| W0234 | <i>O. rufipogon</i> | Or-II | Thailand  | 2.05 |
| W1550 | <i>O. rufipogon</i> | Or-II | Thailand  | 3.92 |
| W1552 | <i>O. rufipogon</i> | Or-II | Thailand  | 1.51 |
| W1553 | <i>O. rufipogon</i> | Or-II | Thailand  | 1.09 |
| W1554 | <i>O. rufipogon</i> | Or-II | Thailand  | 3.1  |
| W1555 | <i>O. rufipogon</i> | Or-II | Thailand  | 0.92 |
| W1556 | <i>O. rufipogon</i> | Or-II | Thailand  | 1.12 |
| W1557 | <i>O. rufipogon</i> | Or-II | Thailand  | 0.7  |
| W1558 | <i>O. rufipogon</i> | Or-II | Thailand  | 2.73 |
| W1790 | <i>O. rufipogon</i> | Or-II | Thailand  | 6.72 |
| W1798 | <i>O. rufipogon</i> | Or-II | Thailand  | 3.28 |
| W1849 | <i>O. rufipogon</i> | Or-II | Thailand  | 9.77 |
| W1850 | <i>O. rufipogon</i> | Or-II | Thailand  | 4.57 |
| W1854 | <i>O. rufipogon</i> | Or-II | Thailand  | 4.73 |
| W1857 | <i>O. rufipogon</i> | Or-II | Thailand  | 3.99 |
| W1858 | <i>O. rufipogon</i> | Or-II | Thailand  | 1.31 |
| W1859 | <i>O. rufipogon</i> | Or-II | Thailand  | 4.65 |
| W1862 | <i>O. rufipogon</i> | Or-II | Thailand  | 2.43 |
| W1870 | <i>O. rufipogon</i> | Or-II | Thailand  | 4.18 |
| W1873 | <i>O. rufipogon</i> | Or-II | Thailand  | 0.78 |
| W1880 | <i>O. rufipogon</i> | Or-II | Thailand  | 2.9  |

|       |                     |        |                  |      |
|-------|---------------------|--------|------------------|------|
| W1882 | <i>O. rufipogon</i> | Or-II  | Thailand         | 2.12 |
| W1884 | <i>O. rufipogon</i> | Or-II  | Thailand         | 2.3  |
| W1890 | <i>O. rufipogon</i> | Or-II  | Thailand         | 3.36 |
| W1891 | <i>O. rufipogon</i> | Or-II  | Thailand         | 1.71 |
| W1895 | <i>O. rufipogon</i> | Or-II  | Thailand         | 1.95 |
| W1896 | <i>O. rufipogon</i> | Or-II  | Thailand         | 2.95 |
| W1916 | <i>O. rufipogon</i> | Or-II  | Thailand         | 3.61 |
| W1919 | <i>O. rufipogon</i> | Or-II  | Thailand         | 1.72 |
| W1927 | <i>O. rufipogon</i> | Or-II  | Thailand         | 1.33 |
| W1939 | <i>O. rufipogon</i> | Or-II  | Thailand         | 1.61 |
| W1940 | <i>O. rufipogon</i> | Or-II  | Thailand         | 5.04 |
| W2272 | <i>O. rufipogon</i> | Or-II  | Thailand         | 1.78 |
| W2276 | <i>O. rufipogon</i> | Or-II  | Thailand         | 1.35 |
| W2282 | <i>O. rufipogon</i> | Or-II  | Thailand         | 4.9  |
| W2283 | <i>O. rufipogon</i> | Or-II  | Thailand         | 2.17 |
| W2284 | <i>O. rufipogon</i> | Or-II  | Thailand         | 1.12 |
| W3091 | <i>O. rufipogon</i> | Or-II  | Yangzi, China    | 1.81 |
| W3097 | <i>O. rufipogon</i> | Or-II  | Yangzi, China    | 1.92 |
| W3098 | <i>O. rufipogon</i> | Or-II  | Yangzi, China    | 1.79 |
| W1715 | <i>O. rufipogon</i> | Or-II  | China            | 5.04 |
| W0621 | <i>O. rufipogon</i> | Or-III | Burma            | 1.39 |
| W0623 | <i>O. rufipogon</i> | Or-III | Burma            | 0.5  |
| W0625 | <i>O. rufipogon</i> | Or-III | Burma            | 0.5  |
| W0629 | <i>O. rufipogon</i> | Or-III | Burma            | 0.36 |
| W0637 | <i>O. rufipogon</i> | Or-III | Burma            | 0.95 |
| W2036 | <i>O. rufipogon</i> | Or-III | Burma            | 1.38 |
| W2198 | <i>O. rufipogon</i> | Or-III | China            | 4.36 |
| W3000 | <i>O. rufipogon</i> | Or-III | Guangdong, China | 0.97 |
| W3001 | <i>O. rufipogon</i> | Or-III | Guangdong, China | 0.69 |
| W3002 | <i>O. rufipogon</i> | Or-III | Guangdong, China | 2.95 |
| W3004 | <i>O. rufipogon</i> | Or-III | Guangdong, China | 2.11 |
| W3005 | <i>O. rufipogon</i> | Or-III | Guangdong, China | 1.19 |
| W3006 | <i>O. rufipogon</i> | Or-III | Guangdong, China | 1.61 |
| W3007 | <i>O. rufipogon</i> | Or-III | Guangdong, China | 2.62 |
| W3008 | <i>O. rufipogon</i> | Or-III | Guangdong, China | 0.68 |
| W3009 | <i>O. rufipogon</i> | Or-III | Guangdong, China | 1.99 |
| W3010 | <i>O. rufipogon</i> | Or-III | Guangdong, China | 2.67 |
| W3011 | <i>O. rufipogon</i> | Or-III | Guangdong, China | 1.27 |
| W3012 | <i>O. rufipogon</i> | Or-III | Guangdong, China | 1.83 |
| W3013 | <i>O. rufipogon</i> | Or-III | Guangdong, China | 1.78 |
| W3014 | <i>O. rufipogon</i> | Or-III | Guangdong, China | 3.6  |
| W3015 | <i>O. rufipogon</i> | Or-III | Guangdong, China | 1.97 |
| W3016 | <i>O. rufipogon</i> | Or-III | Guangdong, China | 0.57 |



|       |                     |        |                  |      |
|-------|---------------------|--------|------------------|------|
| W3017 | <i>O. rufipogon</i> | Or-III | Guangdong, China | 2    |
| W3018 | <i>O. rufipogon</i> | Or-III | Guangdong, China | 1.57 |
| W3019 | <i>O. rufipogon</i> | Or-III | Guangdong, China | 0.83 |
| W3020 | <i>O. rufipogon</i> | Or-III | Guangdong, China | 2.17 |
| W3021 | <i>O. rufipogon</i> | Or-III | Guangdong, China | 1.43 |
| W3022 | <i>O. rufipogon</i> | Or-III | Guangdong, China | 1.58 |
| W3023 | <i>O. rufipogon</i> | Or-III | Guangdong, China | 1.84 |
| W3024 | <i>O. rufipogon</i> | Or-III | Guangdong, China | 0.66 |
| W3025 | <i>O. rufipogon</i> | Or-III | Guangdong, China | 0.53 |
| W3026 | <i>O. rufipogon</i> | Or-III | Guangdong, China | 0.87 |
| W3029 | <i>O. rufipogon</i> | Or-III | Guangdong, China | 0.67 |
| W3030 | <i>O. rufipogon</i> | Or-III | Guangdong, China | 2.41 |
| W3033 | <i>O. rufipogon</i> | Or-III | Guangdong, China | 1.3  |
| W3034 | <i>O. rufipogon</i> | Or-III | Guangdong, China | 2.01 |
| W3035 | <i>O. rufipogon</i> | Or-III | Guangdong, China | 0.94 |
| W3036 | <i>O. rufipogon</i> | Or-III | Guangdong, China | 0.56 |
| W3037 | <i>O. rufipogon</i> | Or-III | Guangdong, China | 1.05 |
| W3038 | <i>O. rufipogon</i> | Or-III | Guangdong, China | 1.23 |
| W3039 | <i>O. rufipogon</i> | Or-III | Guangdong, China | 1    |
| W3040 | <i>O. rufipogon</i> | Or-III | Guangdong, China | 1.75 |
| W3045 | <i>O. rufipogon</i> | Or-III | Guangdong, China | 2.1  |
| W3046 | <i>O. rufipogon</i> | Or-III | Guangdong, China | 5.1  |
| W3027 | <i>O. rufipogon</i> | Or-III | Guangxi, China   | 3.94 |
| W3028 | <i>O. rufipogon</i> | Or-III | Guangxi, China   | 2.65 |
| W3031 | <i>O. rufipogon</i> | Or-III | Guangxi, China   | 1.32 |
| W3032 | <i>O. rufipogon</i> | Or-III | Guangxi, China   | 0.73 |
| W3041 | <i>O. rufipogon</i> | Or-III | Guangxi, China   | 3.55 |
| W3042 | <i>O. rufipogon</i> | Or-III | Guangxi, China   | 1.63 |
| W3043 | <i>O. rufipogon</i> | Or-III | Guangxi, China   | 2.55 |
| W3044 | <i>O. rufipogon</i> | Or-III | Guangxi, China   | 3.99 |
| W3047 | <i>O. rufipogon</i> | Or-III | Guangxi, China   | 3.88 |
| W3048 | <i>O. rufipogon</i> | Or-III | Guangxi, China   | 4.58 |
| W3049 | <i>O. rufipogon</i> | Or-III | Guangxi, China   | 3.96 |
| W3050 | <i>O. rufipogon</i> | Or-III | Guangxi, China   | 3.77 |
| W3051 | <i>O. rufipogon</i> | Or-III | Guangxi, China   | 3.23 |
| W3052 | <i>O. rufipogon</i> | Or-III | Guangxi, China   | 3.73 |
| W3053 | <i>O. rufipogon</i> | Or-III | Hainan, China    | 1.22 |
| W3054 | <i>O. rufipogon</i> | Or-III | Hainan, China    | 1.89 |
| W3055 | <i>O. rufipogon</i> | Or-III | Hainan, China    | 1.11 |
| W3056 | <i>O. rufipogon</i> | Or-III | Hainan, China    | 0.74 |
| W3057 | <i>O. rufipogon</i> | Or-III | Hainan, China    | 1.38 |
| W3058 | <i>O. rufipogon</i> | Or-III | Hainan, China    | 1.42 |
| W3059 | <i>O. rufipogon</i> | Or-III | Hainan, China    | 1.72 |

|       |                     |        |               |      |
|-------|---------------------|--------|---------------|------|
| W3060 | <i>O. rufipogon</i> | Or-III | Hainan, China | 1.77 |
| W3061 | <i>O. rufipogon</i> | Or-III | Hainan, China | 1.22 |
| W3062 | <i>O. rufipogon</i> | Or-III | Hainan, China | 2.25 |
| W3063 | <i>O. rufipogon</i> | Or-III | Hainan, China | 1.32 |
| W3064 | <i>O. rufipogon</i> | Or-III | Hainan, China | 0.87 |
| W3065 | <i>O. rufipogon</i> | Or-III | Hainan, China | 4.02 |
| W3066 | <i>O. rufipogon</i> | Or-III | Hainan, China | 3.44 |
| W3069 | <i>O. rufipogon</i> | Or-III | Hainan, China | 2.73 |
| W3070 | <i>O. rufipogon</i> | Or-III | Hainan, China | 4.16 |
| W3071 | <i>O. rufipogon</i> | Or-III | Hainan, China | 3.11 |
| W3073 | <i>O. rufipogon</i> | Or-III | Hainan, China | 3.27 |
| W3074 | <i>O. rufipogon</i> | Or-III | Hainan, China | 2.76 |
| W0125 | <i>O. rufipogon</i> | Or-III | India         | 2.27 |
| W0126 | <i>O. rufipogon</i> | Or-III | India         | 1.62 |
| W0133 | <i>O. rufipogon</i> | Or-III | India         | 0.81 |
| W0134 | <i>O. rufipogon</i> | Or-III | India         | 1.17 |
| W0135 | <i>O. rufipogon</i> | Or-III | India         | 0.85 |
| W0136 | <i>O. rufipogon</i> | Or-III | India         | 0.57 |
| W0137 | <i>O. rufipogon</i> | Or-III | India         | 0.89 |
| W0138 | <i>O. rufipogon</i> | Or-III | India         | 1.02 |
| W0141 | <i>O. rufipogon</i> | Or-III | India         | 1.11 |
| W0149 | <i>O. rufipogon</i> | Or-III | India         | 1.58 |
| W0153 | <i>O. rufipogon</i> | Or-III | India         | 2.54 |
| W0549 | <i>O. rufipogon</i> | Or-III | India         | 1.35 |
| W1102 | <i>O. rufipogon</i> | Or-III | India         | 0.85 |
| W1114 | <i>O. rufipogon</i> | Or-III | India         | 1.2  |
| W1119 | <i>O. rufipogon</i> | Or-III | India         | 1.75 |
| W1534 | <i>O. rufipogon</i> | Or-III | India         | 0.63 |
| W1668 | <i>O. rufipogon</i> | Or-III | India         | 1.36 |
| W1669 | <i>O. rufipogon</i> | Or-III | India         | 3.56 |
| W1732 | <i>O. rufipogon</i> | Or-III | India         | 1.39 |
| W1739 | <i>O. rufipogon</i> | Or-III | India         | 1.3  |
| W1746 | <i>O. rufipogon</i> | Or-III | India         | 2.37 |
| W1748 | <i>O. rufipogon</i> | Or-III | India         | 6.41 |
| W1759 | <i>O. rufipogon</i> | Or-III | India         | 2.8  |
| W1766 | <i>O. rufipogon</i> | Or-III | India         | 3.19 |
| W1777 | <i>O. rufipogon</i> | Or-III | India         | 4.84 |
| W1782 | <i>O. rufipogon</i> | Or-III | India         | 3.48 |
| W1783 | <i>O. rufipogon</i> | Or-III | India         | 0.42 |
| W1784 | <i>O. rufipogon</i> | Or-III | India         | 0.54 |
| W1989 | <i>O. rufipogon</i> | Or-III | India         | 1.25 |
| W1990 | <i>O. rufipogon</i> | Or-III | India         | 1.34 |
| W1991 | <i>O. rufipogon</i> | Or-III | India         | 1.84 |

|       |                     |        |               |      |
|-------|---------------------|--------|---------------|------|
| W1993 | <i>O. rufipogon</i> | Or-III | India         | 1.33 |
| W1995 | <i>O. rufipogon</i> | Or-III | India         | 0.85 |
| W1998 | <i>O. rufipogon</i> | Or-III | India         | 2.24 |
| W2003 | <i>O. rufipogon</i> | Or-III | India         | 1.88 |
| W2005 | <i>O. rufipogon</i> | Or-III | India         | 1.97 |
| W2007 | <i>O. rufipogon</i> | Or-III | India         | 1.53 |
| W2008 | <i>O. rufipogon</i> | Or-III | India         | 1.64 |
| W2010 | <i>O. rufipogon</i> | Or-III | India         | 1.06 |
| W2012 | <i>O. rufipogon</i> | Or-III | India         | 1.08 |
| W2014 | <i>O. rufipogon</i> | Or-III | India         | 0.88 |
| W1973 | <i>O. rufipogon</i> | Or-III | Indonesia     | 2.74 |
| W2267 | <i>O. rufipogon</i> | Or-III | Laos          | 2.09 |
| W0573 | <i>O. rufipogon</i> | Or-III | Malaya        | 1.86 |
| W0593 | <i>O. rufipogon</i> | Or-III | Malaya        | 0.84 |
| W1542 | <i>O. rufipogon</i> | Or-III | Malaya        | 1.06 |
| W0172 | <i>O. rufipogon</i> | Or-III | Thailand      | 1.13 |
| W1560 | <i>O. rufipogon</i> | Or-III | Thailand      | 1.45 |
| W1725 | <i>O. rufipogon</i> | Or-III | Thailand      | 6.92 |
| W3075 | <i>O. rufipogon</i> | Or-III | Yangzi, China | 1.53 |
| W3076 | <i>O. rufipogon</i> | Or-III | Yangzi, China | 0.44 |
| W3077 | <i>O. rufipogon</i> | Or-III | Yangzi, China | 0.65 |
| W3078 | <i>O. rufipogon</i> | Or-III | Yangzi, China | 1.05 |
| W3079 | <i>O. rufipogon</i> | Or-III | Yangzi, China | 1.62 |
| W3080 | <i>O. rufipogon</i> | Or-III | Yangzi, China | 1.69 |
| W3081 | <i>O. rufipogon</i> | Or-III | Yangzi, China | 0.93 |
| W3082 | <i>O. rufipogon</i> | Or-III | Yangzi, China | 1.46 |
| W3092 | <i>O. rufipogon</i> | Or-III | Yangzi, China | 2.7  |
| W3093 | <i>O. rufipogon</i> | Or-III | Yangzi, China | 0.27 |
| W3094 | <i>O. rufipogon</i> | Or-III | Yangzi, China | 2.89 |
| W3095 | <i>O. rufipogon</i> | Or-III | Yangzi, China | 1.66 |
| W3096 | <i>O. rufipogon</i> | Or-III | Yangzi, China | 0.86 |

1. Clades were classified by Huang et al.,2012

Reference:

**Huang X, Kurata N, Wei X, Wang ZX, Wang A, Zhao Q, Zhao Y, Liu K, Lu H, Li W, et al. 2012.** A map of rice genome variation reveals the origin of cultivated rice. *Nature* **490**(7421): 497-501.

**Table S5** SNP genotype of DR-I. We genotyped all the SNPs within DR-I regions and classified them as Japonica type or Indica type.

| Name    | Depth | Clade <sup>1</sup> | Original Place | Japonica_Type |       | Indica_Type |       | Hete | Unmap |
|---------|-------|--------------------|----------------|---------------|-------|-------------|-------|------|-------|
|         |       |                    |                | SNP num       | %     | SNP num     | %     |      |       |
| W1725   | 5.7   | Or-III             | Thailand       | 2582          | 0.863 | 410         | 0.137 | 439  | 261   |
| W1114   | 1.11  | Or-III             | India          | 1568          | 0.859 | 258         | 0.141 | 3    | 1863  |
| W1560   | 1.31  | Or-III             | Thailand       | 1798          | 0.849 | 319         | 0.151 | 18   | 1557  |
| W3093   | 0.25  | Or-III             | Yangzi         | 524           | 0.849 | 93          | 0.151 | 0    | 3075  |
| W3096   | 0.8   | Or-III             | Yangzi         | 1442          | 0.841 | 272         | 0.159 | 31   | 1947  |
| W3077   | 0.63  | Or-III             | Yangzi         | 1266          | 0.841 | 240         | 0.159 | 18   | 2168  |
| W0637   | 0.79  | Or-III             | Burma          | 1153          | 0.837 | 224         | 0.163 | 12   | 2303  |
| W3095   | 1.56  | Or-III             | Yangzi         | 2041          | 0.825 | 433         | 0.175 | 56   | 1162  |
| P46     | 14.78 | -                  | Hainan;China   | 2465          | 0.824 | 526         | 0.176 | 664  | 37    |
| W3081   | 0.83  | Or-III             | Yangzi         | 1471          | 0.824 | 315         | 0.176 | 36   | 1870  |
| W2198   | 3.88  | Or-III             | China          | 2637          | 0.818 | 586         | 0.182 | 62   | 407   |
| W3040   | 1.49  | Or-III             | Guangdong      | 2017          | 0.817 | 453         | 0.183 | 114  | 1108  |
| W3015   | 1.74  | Or-III             | Guangdong      | 2038          | 0.814 | 467         | 0.186 | 190  | 997   |
| W3092   | 2.5   | Or-III             | Yangzi         | 2346          | 0.812 | 542         | 0.188 | 166  | 638   |
| W3037   | 0.92  | Or-III             | Guangdong      | 1534          | 0.808 | 364         | 0.192 | 61   | 1733  |
| W3002   | 2.52  | Or-III             | Guangdong      | 2277          | 0.806 | 548         | 0.194 | 207  | 660   |
| W3079   | 1.39  | Or-III             | Yangzi         | 1988          | 0.806 | 480         | 0.194 | 46   | 1178  |
| W3039   | 0.91  | Or-III             | Guangdong      | 1554          | 0.805 | 376         | 0.195 | 39   | 1723  |
| W3078   | 0.97  | Or-III             | Yangzi         | 1669          | 0.805 | 405         | 0.195 | 8    | 1610  |
| W1943   | 20.8  | Or-III             | Jiangxi        | 2852          | 0.800 | 715         | 0.200 | 116  | 9     |
| W3046   | 4.36  | Or-III             | Guangdong      | 2408          | 0.796 | 616         | 0.204 | 281  | 387   |
| W3013   | 1.6   | Or-III             | Guangdong      | 1964          | 0.789 | 526         | 0.211 | 68   | 1134  |
| W3076   | 0.41  | Or-III             | Yangzi         | 957           | 0.788 | 258         | 0.212 | 2    | 2475  |
| W3005   | 1.02  | Or-III             | Guangdong      | 1469          | 0.787 | 398         | 0.213 | 47   | 1778  |
| W3043   | 2.32  | Or-III             | Guangxi        | 2023          | 0.785 | 555         | 0.215 | 215  | 899   |
| W3018   | 1.44  | Or-III             | Guangdong      | 1775          | 0.781 | 498         | 0.219 | 113  | 1306  |
| W3080   | 1.58  | Or-III             | Yangzi         | 1979          | 0.780 | 558         | 0.220 | 181  | 974   |
| W3075   | 1.46  | Or-III             | Yangzi         | 1990          | 0.779 | 564         | 0.221 | 10   | 1128  |
| W3026   | 0.55  | Or-III             | Guangdong      | 928           | 0.776 | 268         | 0.224 | 40   | 2456  |
| W3038   | 1.1   | Or-III             | Guangdong      | 1706          | 0.775 | 495         | 0.225 | 21   | 1470  |
| W3027   | 3.49  | Or-III             | Guangxi        | 2170          | 0.766 | 662         | 0.234 | 312  | 548   |
| W3032   | 0.63  | Or-III             | Guangxi        | 1110          | 0.763 | 344         | 0.237 | 27   | 2211  |
| W3042   | 1.48  | Or-III             | Guangxi        | 1658          | 0.762 | 518         | 0.238 | 102  | 1414  |
| W3045   | 1.87  | Or-III             | Guangdong      | 1771          | 0.757 | 569         | 0.243 | 178  | 1174  |
| W3036   | 0.46  | Or-III             | Guangdong      | 860           | 0.750 | 287         | 0.250 | 19   | 2526  |
| Yuan3_9 | 12.83 |                    | Yunnan         | 2676          | 0.740 | 938         | 0.260 | 23   | 55    |
| W3048   | 3.81  | Or-III             | Guangxi        | 2322          | 0.739 | 821         | 0.261 | 80   | 469   |

|       |       |        |           |      |       |      |       |      |      |
|-------|-------|--------|-----------|------|-------|------|-------|------|------|
| W3024 | 0.35  | Or-III | Guangdong | 578  | 0.730 | 214  | 0.270 | 21   | 2879 |
| W3074 | 2.59  | Or-III | Hainan    | 2076 | 0.727 | 778  | 0.273 | 48   | 790  |
| W3044 | 3.38  | Or-III | Guangxi   | 1892 | 0.727 | 711  | 0.273 | 549  | 540  |
| W3030 | 2.27  | Or-III | Guangdong | 2128 | 0.726 | 802  | 0.274 | 176  | 586  |
| W3050 | 3.56  | Or-III | Guangxi   | 2118 | 0.719 | 827  | 0.281 | 247  | 500  |
| W3000 | 0.89  | Or-III | Guangdong | 1224 | 0.707 | 508  | 0.293 | 116  | 1844 |
| W3047 | 3.45  | Or-III | Guangxi   | 1942 | 0.704 | 818  | 0.296 | 417  | 515  |
| W3028 | 2.4   | Or-III | Guangxi   | 1699 | 0.698 | 735  | 0.302 | 351  | 907  |
| W3029 | 0.59  | Or-III | Guangdong | 967  | 0.695 | 425  | 0.305 | 30   | 2270 |
| W3052 | 3.46  | Or-III | Guangxi   | 1891 | 0.693 | 839  | 0.307 | 386  | 576  |
| W3009 | 1.93  | Or-III | Guangdong | 1581 | 0.689 | 714  | 0.311 | 341  | 1056 |
| W3094 | 2.75  | Or-III | Yangzi    | 1460 | 0.684 | 673  | 0.316 | 1015 | 544  |
| W3041 | 3.18  | Or-III | Guangxi   | 1866 | 0.682 | 871  | 0.318 | 329  | 626  |
| W3082 | 1.36  | Or-III | Yangzi    | 1675 | 0.680 | 787  | 0.320 | 59   | 1171 |
| W3071 | 2.85  | Or-III | Hainan    | 1760 | 0.666 | 884  | 0.334 | 350  | 698  |
| W3025 | 0.3   | Or-III | Guangdong | 512  | 0.664 | 259  | 0.336 | 23   | 2898 |
| W2036 | 1.18  | Or-III | Burma     | 1336 | 0.663 | 680  | 0.337 | 136  | 1540 |
| W3020 | 1.46  | Or-III | Guangdong | 1464 | 0.657 | 764  | 0.343 | 140  | 1324 |
| W3016 | 0.52  | Or-III | Guangdong | 856  | 0.652 | 457  | 0.348 | 48   | 2331 |
| W3051 | 2.6   | Or-III | Guangxi   | 1674 | 0.651 | 896  | 0.349 | 268  | 854  |
| W3070 | 3.82  | Or-III | Hainan    | 1844 | 0.650 | 995  | 0.350 | 401  | 452  |
| W3049 | 3.45  | Or-III | Guangxi   | 1794 | 0.649 | 972  | 0.351 | 329  | 597  |
| W3069 | 2.48  | Or-III | Hainan    | 1689 | 0.642 | 943  | 0.358 | 270  | 790  |
| W3006 | 1.51  | Or-III | Guangdong | 1314 | 0.631 | 767  | 0.369 | 224  | 1387 |
| W3011 | 1.25  | Or-III | Guangdong | 1124 | 0.628 | 666  | 0.372 | 335  | 1567 |
| W3066 | 2.97  | Or-III | Hainan    | 1775 | 0.626 | 1061 | 0.374 | 224  | 632  |
| W3021 | 1.36  | Or-III | Guangdong | 1271 | 0.621 | 776  | 0.379 | 318  | 1327 |
| W3058 | 1.31  | Or-III | Hainan    | 1471 | 0.619 | 906  | 0.381 | 33   | 1282 |
| W3059 | 1.58  | Or-III | Hainan    | 1509 | 0.616 | 939  | 0.384 | 75   | 1169 |
| W3061 | 1.06  | Or-III | Hainan    | 1298 | 0.613 | 820  | 0.387 | 20   | 1554 |
| W3031 | 1.22  | Or-III | Guangxi   | 1292 | 0.611 | 823  | 0.389 | 186  | 1391 |
| VOC4  | 18.52 | -      | Nepal     | 1814 | 0.610 | 1158 | 0.390 | 678  | 42   |
| W3063 | 1.2   | Or-III | Hainan    | 1322 | 0.606 | 860  | 0.394 | 102  | 1408 |
| W1766 | 2.79  | Or-III | India     | 1671 | 0.601 | 1109 | 0.399 | 71   | 841  |
| W1973 | 2.33  | Or-III | Indonesia | 1187 | 0.598 | 799  | 0.402 | 11   | 1695 |
| W3062 | 2.1   | Or-III | Hainan    | 1637 | 0.594 | 1118 | 0.406 | 163  | 774  |
| W3008 | 0.7   | Or-III | Guangdong | 932  | 0.592 | 641  | 0.408 | 19   | 2100 |
| W1759 | 2.47  | Or-III | India     | 1526 | 0.592 | 1050 | 0.408 | 175  | 941  |
| W3073 | 2.91  | Or-III | Hainan    | 1630 | 0.591 | 1126 | 0.409 | 244  | 692  |
| W3057 | 1.28  | Or-III | Hainan    | 1321 | 0.579 | 961  | 0.421 | 64   | 1346 |
| W1746 | 2.07  | Or-III | India     | 1413 | 0.573 | 1053 | 0.427 | 130  | 1096 |
| W3014 | 3.2   | Or-III | Guangdong | 1366 | 0.573 | 1018 | 0.427 | 744  | 564  |
| W1102 | 0.72  | Or-III | India     | 810  | 0.573 | 604  | 0.427 | 9    | 2269 |

|       |      |        |           |      |       |      |       |     |      |
|-------|------|--------|-----------|------|-------|------|-------|-----|------|
| W3017 | 1.76 | Or-III | Guangdong | 1281 | 0.573 | 956  | 0.427 | 438 | 1017 |
| W0625 | 0.49 | Or-III | Burma     | 597  | 0.567 | 456  | 0.433 | 2   | 2637 |
| W0623 | 0.49 | Or-III | Burma     | 572  | 0.562 | 446  | 0.438 |     | 2674 |
| W3055 | 1    | Or-III | Hainan    | 1058 | 0.561 | 829  | 0.439 | 99  | 1706 |
| W3012 | 1.74 | Or-III | Guangdong | 1437 | 0.555 | 1152 | 0.445 | 26  | 1077 |
| W3034 | 1.78 | Or-III | Guangdong | 1365 | 0.554 | 1099 | 0.446 | 345 | 883  |
| W3033 | 1.08 | Or-III | Guangdong | 1067 | 0.553 | 864  | 0.447 | 117 | 1644 |
| W3007 | 2.58 | Or-III | Guangdong | 1479 | 0.551 | 1206 | 0.449 | 222 | 785  |
| W1096 | 4.16 | Or-II  | India     | 1544 | 0.550 | 1262 | 0.450 | 317 | 569  |
| W0629 | 0.34 | Or-III | Burma     | 401  | 0.547 | 332  | 0.453 |     | 2959 |
| W3054 | 1.8  | Or-III | Hainan    | 1341 | 0.546 | 1117 | 0.454 | 256 | 978  |
| W3022 | 1.56 | Or-III | Guangdong | 1064 | 0.544 | 892  | 0.456 | 559 | 1177 |
| W2005 | 1.61 | Or-III | India     | 1343 | 0.543 | 1130 | 0.457 | 10  | 1209 |
| W1534 | 0.54 | Or-III | India     | 613  | 0.539 | 524  | 0.461 | 3   | 2552 |
| W0133 | 0.69 | Or-III | India     | 744  | 0.538 | 639  | 0.462 | 4   | 2305 |
| W1119 | 1.49 | Or-III | India     | 1145 | 0.537 | 988  | 0.463 | 11  | 1548 |
| W1783 | 0.39 | Or-III | India     | 521  | 0.537 | 450  | 0.463 |     | 2721 |
| W3053 | 1.13 | Or-III | Hainan    | 1088 | 0.536 | 941  | 0.464 | 147 | 1516 |
| W0634 | 0.83 | Or-II  | Burma     | 748  | 0.535 | 651  | 0.465 | 41  | 2252 |
| W1782 | 3.01 | Or-III | India     | 1634 | 0.535 | 1423 | 0.465 | 17  | 618  |
| W0593 | 0.75 | Or-III | Malaya    | 753  | 0.534 | 656  | 0.466 | 4   | 2279 |
| W2010 | 0.92 | Or-III | India     | 963  | 0.534 | 839  | 0.466 | 2   | 1888 |
| W0621 | 1.4  | Or-III | Burma     | 1124 | 0.534 | 980  | 0.466 | 2   | 1586 |
| W3001 | 0.63 | Or-III | Guangdong | 685  | 0.534 | 598  | 0.466 | 102 | 2307 |
| W1976 | 1.58 | Or-II  | Indonesia | 1308 | 0.532 | 1149 | 0.468 | 45  | 1190 |
| W0172 | 0.95 | Or-III | Thailand  | 876  | 0.532 | 770  | 0.468 | 2   | 2044 |
| W1989 | 1.16 | Or-III | India     | 1095 | 0.531 | 966  | 0.469 | 3   | 1628 |
| W0136 | 0.5  | Or-III | India     | 531  | 0.530 | 470  | 0.470 | 3   | 2688 |
| W0134 | 1.04 | Or-III | India     | 892  | 0.528 | 796  | 0.472 | 4   | 2000 |
| W0137 | 0.81 | Or-III | India     | 810  | 0.528 | 724  | 0.472 | 1   | 2157 |
| W2003 | 1.65 | Or-III | India     | 1325 | 0.527 | 1189 | 0.473 | 10  | 1168 |
| W1784 | 0.49 | Or-III | India     | 602  | 0.526 | 542  | 0.474 | 6   | 2542 |
| W2014 | 0.74 | Or-III | India     | 858  | 0.526 | 773  | 0.474 | 2   | 2059 |
| W0138 | 0.89 | Or-III | India     | 841  | 0.526 | 758  | 0.474 | 3   | 2090 |
| W0132 | 1.21 | Or-II  | India     | 1017 | 0.523 | 928  | 0.477 | 34  | 1713 |
| W1998 | 1.97 | Or-III | India     | 1452 | 0.523 | 1325 | 0.477 | 9   | 906  |
| W0135 | 0.72 | Or-III | India     | 762  | 0.523 | 696  | 0.477 | 3   | 2231 |
| W3065 | 3.57 | Or-III | Hainan    | 1510 | 0.522 | 1383 | 0.478 | 269 | 530  |
| W3064 | 0.82 | Or-III | Hainan    | 902  | 0.521 | 829  | 0.479 | 47  | 1914 |
| W1990 | 1.32 | Or-III | India     | 1172 | 0.520 | 1081 | 0.480 | 8   | 1431 |
| W2008 | 1.36 | Or-III | India     | 1175 | 0.519 | 1087 | 0.481 | 3   | 1427 |
| W1780 | 1.92 | Or-II  | India     | 1379 | 0.519 | 1277 | 0.481 | 25  | 1011 |
| W0549 | 1.19 | Or-III | India     | 1048 | 0.518 | 977  | 0.482 | 2   | 1665 |

|             |       |        |                          |      |       |      |       |     |      |
|-------------|-------|--------|--------------------------|------|-------|------|-------|-----|------|
| W1542       | 0.94  | Or-III | Malaya                   | 894  | 0.517 | 835  | 0.483 | 2   | 1961 |
| W0573       | 1.57  | Or-III | Malaya                   | 1176 | 0.515 | 1108 | 0.485 | 6   | 1402 |
| W2007       | 1.28  | Or-III | India                    | 1131 | 0.515 | 1067 | 0.485 | 4   | 1490 |
| W1739       | 1.12  | Or-III | India                    | 1007 | 0.514 | 952  | 0.486 | 4   | 1729 |
| W0120       | 0.74  | Or-II  | India                    | 733  | 0.513 | 695  | 0.487 | 19  | 2245 |
| W0141       | 0.99  | Or-III | India                    | 839  | 0.511 | 802  | 0.489 | 4   | 2047 |
| W1993       | 1.24  | Or-III | India                    | 1147 | 0.511 | 1097 | 0.489 | 7   | 1441 |
| W0153       | 2.29  | Or-III | India                    | 1340 | 0.510 | 1286 | 0.490 | 9   | 1057 |
| W1991       | 1.68  | Or-III | India                    | 1240 | 0.510 | 1192 | 0.490 | 8   | 1252 |
| W3056       | 0.7   | Or-III | Hainan                   | 722  | 0.509 | 697  | 0.491 | 28  | 2245 |
| W1995       | 0.77  | Or-III | India                    | 822  | 0.507 | 798  | 0.493 | 1   | 2071 |
| W2024       | 3.74  | Or-II  | Indonesia                | 1620 | 0.506 | 1581 | 0.494 | 40  | 451  |
| W1971       | 1.65  | Or-II  | Indonesia                | 1233 | 0.505 | 1209 | 0.495 | 87  | 1163 |
| W2197       | 2.85  | Or-II  | Indonesia                | 1488 | 0.504 | 1465 | 0.496 | 159 | 580  |
| W0624       | 0.69  | Or-II  | Burma                    | 664  | 0.503 | 656  | 0.497 | 3   | 2369 |
| W1880       | 2.56  | Or-II  | Thailand                 | 1465 | 0.503 | 1450 | 0.497 | 171 | 606  |
| W2284       | 0.95  | Or-II  | Thailand                 | 939  | 0.502 | 931  | 0.498 | 8   | 1814 |
| W1979       | 1.85  | Or-II  | Indonesia                | 1313 | 0.501 | 1306 | 0.499 | 24  | 1049 |
| W0125       | 2.03  | Or-III | India                    | 1321 | 0.500 | 1320 | 0.500 | 12  | 1039 |
| W2012       | 0.98  | Or-III | India                    | 924  | 0.498 | 930  | 0.502 | 4   | 1834 |
| W1977       | 3.46  | Or-II  | Indonesia                | 1504 | 0.497 | 1521 | 0.503 | 160 | 507  |
| W1857       | 3.19  | Or-II  | Thailand                 | 1397 | 0.492 | 1443 | 0.508 | 184 | 668  |
| W2017       | 1.9   | Or-II  | Indonesia                | 1227 | 0.492 | 1269 | 0.508 | 151 | 1045 |
| W1891       | 1.43  | Or-II  | Thailand                 | 1232 | 0.491 | 1278 | 0.509 | 52  | 1130 |
| W0600       | 0.9   | Or-II  | Malaya                   | 805  | 0.490 | 838  | 0.510 | 29  | 2020 |
| W2308       | 2.23  | Or-II  | Laos                     | 1318 | 0.489 | 1376 | 0.511 | 68  | 930  |
| W1884       | 2.07  | Or-II  | Thailand                 | 1356 | 0.488 | 1420 | 0.512 | 128 | 788  |
| W2022       | 3.71  | Or-II  | Indonesia                | 1474 | 0.486 | 1560 | 0.514 | 208 | 450  |
| W0149       | 1.43  | Or-III | India                    | 1006 | 0.486 | 1065 | 0.514 | 98  | 1523 |
| W1890       | 2.93  | Or-II  | Thailand                 | 1533 | 0.486 | 1624 | 0.514 | 26  | 509  |
| W3010       | 2.46  | Or-III | Guangdong                | 1023 | 0.483 | 1094 | 0.517 | 870 | 705  |
| W1940       | 4.82  | Or-II  | Thailand                 | 1621 | 0.480 | 1758 | 0.520 | 56  | 257  |
| W1126       | 2.46  | Or-II  | India                    | 1334 | 0.480 | 1447 | 0.520 | 154 | 757  |
| W1850       | 4.02  | Or-II  | Thailand                 | 1450 | 0.477 | 1587 | 0.523 | 153 | 502  |
| W0174       | 2.84  | Or-II  | Thailand                 | 1382 | 0.477 | 1514 | 0.523 | 34  | 762  |
| W1798       | 3     | Or-II  | Thailand                 | 1427 | 0.477 | 1564 | 0.523 | 212 | 489  |
| W1669       | 3.45  | Or-III | India                    | 1434 | 0.477 | 1572 | 0.523 | 307 | 379  |
| PADI_PADIAN | 16.48 | -      | Kromat<br>Watu;Indonesia | 1560 | 0.476 | 1717 | 0.524 | 320 | 95   |
| W1978       | 1.7   | Or-II  | Indonesia                | 1181 | 0.476 | 1301 | 0.524 | 61  | 1149 |
| W0180       | 2.74  | Or-II  | Thailand                 | 1335 | 0.475 | 1475 | 0.525 | 10  | 872  |
| W1777       | 4.35  | Or-III | India                    | 1432 | 0.475 | 1583 | 0.525 | 281 | 396  |
| W1972       | 2.37  | Or-II  | Indonesia                | 1328 | 0.475 | 1469 | 0.525 | 109 | 786  |

|       |      |        |           |      |       |      |       |     |      |
|-------|------|--------|-----------|------|-------|------|-------|-----|------|
| W1919 | 1.61 | Or-II  | Thailand  | 1204 | 0.474 | 1335 | 0.526 | 53  | 1100 |
| W0108 | 1.68 | Or-II  | India     | 1128 | 0.474 | 1252 | 0.526 | 20  | 1292 |
| W3060 | 1.63 | Or-III | Hainan    | 1146 | 0.470 | 1292 | 0.530 | 212 | 1042 |
| W0628 | 1.92 | Or-II  | Burma     | 1161 | 0.468 | 1318 | 0.532 | 43  | 1170 |
| W2282 | 2.99 | Or-II  | Thailand  | 1352 | 0.468 | 1538 | 0.532 | 209 | 593  |
| W1981 | 1.2  | Or-II  | Indonesia | 1020 | 0.467 | 1162 | 0.533 | 3   | 1507 |
| W1558 | 2.36 | Or-II  | Thailand  | 1299 | 0.467 | 1480 | 0.533 | 48  | 865  |
| W1939 | 1.44 | Or-II  | Thailand  | 1121 | 0.467 | 1278 | 0.533 | 75  | 1218 |
| W2025 | 0.97 | Or-II  | Indonesia | 848  | 0.466 | 972  | 0.534 | 42  | 1830 |
| W1790 | 5.59 | Or-II  | Thailand  | 1608 | 0.466 | 1845 | 0.534 | 13  | 226  |
| W1849 | 9.13 | Or-II  | Thailand  | 1560 | 0.465 | 1793 | 0.535 | 203 | 136  |
| W2272 | 1.48 | Or-II  | Thailand  | 1117 | 0.465 | 1286 | 0.535 | 15  | 1274 |
| W2021 | 2.33 | Or-II  | Indonesia | 1337 | 0.465 | 1540 | 0.535 | 47  | 768  |
| W2266 | 1.16 | Or-II  | Laos      | 872  | 0.465 | 1005 | 0.535 | 17  | 1798 |
| W3091 | 1.62 | Or-II  | Yangzi    | 1082 | 0.464 | 1248 | 0.536 | 262 | 1100 |
| W1683 | 5.63 | Or-II  | India     | 1527 | 0.463 | 1770 | 0.537 | 104 | 291  |
| W2288 | 2.7  | Or-II  | Cambodia  | 1370 | 0.463 | 1592 | 0.537 | 128 | 602  |
| W2283 | 1.9  | Or-II  | Thailand  | 1190 | 0.462 | 1384 | 0.538 | 126 | 992  |
| W0171 | 5.7  | Or-II  | Thailand  | 1499 | 0.459 | 1770 | 0.541 | 173 | 250  |
| W2030 | 2.22 | Or-II  | Indonesia | 1284 | 0.458 | 1522 | 0.542 | 52  | 834  |
| W3035 | 0.82 | Or-III | Guangdong | 737  | 0.456 | 878  | 0.544 | 199 | 1878 |
| W3004 | 1.75 | Or-III | Guangdong | 944  | 0.456 | 1126 | 0.544 | 530 | 1092 |
| W2267 | 1.77 | Or-III | Laos      | 1234 | 0.455 | 1476 | 0.545 | 10  | 972  |
| W1896 | 2.83 | Or-II  | Thailand  | 1351 | 0.453 | 1634 | 0.547 | 224 | 483  |
| W1122 | 2.97 | Or-II  | India     | 1367 | 0.452 | 1658 | 0.548 | 56  | 611  |
| W1975 | 2.5  | Or-II  | Indonesia | 1349 | 0.452 | 1638 | 0.548 | 13  | 692  |
| W0157 | 0.89 | Or-II  | India     | 656  | 0.449 | 804  | 0.551 | 25  | 2207 |
| W1292 | 0.86 | Or-II  | Indonesia | 703  | 0.448 | 865  | 0.552 | 35  | 2089 |
| W1854 | 4.24 | Or-II  | Thailand  | 1457 | 0.446 | 1810 | 0.554 | 12  | 413  |
| W1553 | 1    | Or-II  | Thailand  | 763  | 0.445 | 950  | 0.555 | 37  | 1942 |
| W3097 | 1.83 | Or-II  | Yangzi    | 1136 | 0.445 | 1419 | 0.555 | 151 | 986  |
| W1093 | 4.47 | Or-II  | India     | 1229 | 0.444 | 1537 | 0.556 | 500 | 426  |
| W1974 | 1.98 | Or-II  | Indonesia | 1176 | 0.444 | 1473 | 0.556 | 42  | 1001 |
| W3098 | 1.67 | Or-II  | Yangzi    | 1090 | 0.442 | 1378 | 0.558 | 175 | 1049 |
| W0576 | 3.32 | Or-II  | Malaya    | 1229 | 0.441 | 1556 | 0.559 | 294 | 613  |
| W1552 | 1.28 | Or-II  | Thailand  | 866  | 0.440 | 1101 | 0.560 | 76  | 1649 |
| W0169 | 0.99 | Or-II  | Thailand  | 763  | 0.440 | 971  | 0.560 | 4   | 1954 |
| W1732 | 1.24 | Or-III | India     | 846  | 0.440 | 1077 | 0.560 | 31  | 1738 |
| W1862 | 2.18 | Or-II  | Thailand  | 1209 | 0.437 | 1555 | 0.563 | 152 | 776  |
| W1916 | 3.31 | Or-II  | Thailand  | 1307 | 0.432 | 1715 | 0.568 | 248 | 422  |
| W1882 | 1.96 | Or-II  | Thailand  | 1113 | 0.424 | 1509 | 0.576 | 235 | 835  |
| W0175 | 3.47 | Or-II  | Thailand  | 1255 | 0.424 | 1702 | 0.576 | 181 | 554  |
| W0596 | 0.97 | Or-II  | Malaya    | 727  | 0.419 | 1009 | 0.581 | 9   | 1947 |



|          |       |        |                      |      |       |      |       |     |      |
|----------|-------|--------|----------------------|------|-------|------|-------|-----|------|
| W0166    | 0.53  | Or-II  | Thailand             | 407  | 0.418 | 566  | 0.582 | 1   | 2718 |
| W1870    | 3.76  | Or-II  | Thailand             | 1334 | 0.417 | 1865 | 0.583 | 145 | 348  |
| W1554    | 2.14  | Or-II  | Thailand             | 1062 | 0.404 | 1566 | 0.596 | 41  | 1023 |
| W1715    |       | Or-II  |                      | 1116 | 0.397 | 1695 | 0.603 | 513 | 368  |
| W1556    | 1.01  | Or-II  | Thailand             | 726  | 0.393 | 1120 | 0.607 | 19  | 1827 |
| W3023    | 1.47  | Or-III | Guangdong            | 781  | 0.391 | 1216 | 0.609 | 450 | 1245 |
| W1859    | 4.27  | Or-II  | Thailand             | 1154 | 0.377 | 1906 | 0.623 | 212 | 420  |
| W1983    | 1.78  | Or-I   | India                | 970  | 0.375 | 1618 | 0.625 | 11  | 1093 |
| W1756    | 1.01  | Or-I   | India                | 688  | 0.371 | 1168 | 0.629 | 1   | 1835 |
| W0606    | 1.13  | Or-II  | Malaya               | 678  | 0.365 | 1179 | 0.635 | 36  | 1799 |
| W1087    | 5.48  | Or-II  | India                | 1086 | 0.364 | 1901 | 0.636 | 319 | 386  |
| W0165    | 0.79  | Or-II  | Thailand             | 483  | 0.363 | 846  | 0.637 |     | 2363 |
| W1748    | 5.59  | Or-III | India                | 973  | 0.360 | 1729 | 0.640 | 661 | 329  |
| DAL_DHAN | 17.78 | -      | Chakaria;Bangladesh  | 974  | 0.354 | 1777 | 0.646 | 886 | 55   |
| W1550    | 3.29  | Or-II  | Thailand             | 883  | 0.341 | 1710 | 0.659 | 488 | 611  |
| W3019    | 0.67  | Or-III | Guangdong            | 460  | 0.334 | 917  | 0.666 | 110 | 2205 |
| W0164    | 1.4   | Or-II  | Thailand             | 687  | 0.334 | 1372 | 0.666 | 55  | 1578 |
| W0163    | 3.3   | Or-II  | Thailand             | 957  | 0.327 | 1969 | 0.673 | 237 | 529  |
| W1895    | 1.71  | Or-II  | Thailand             | 822  | 0.322 | 1728 | 0.678 | 91  | 1051 |
| W3068    | 1.55  | Or-II  | Hainan               | 605  | 0.319 | 1293 | 0.681 | 440 | 1354 |
| W0126    | 1.46  | Or-III | India                | 641  | 0.317 | 1384 | 0.683 | 247 | 1420 |
| W0594    | 1.21  | Or-II  | Malaya               | 596  | 0.311 | 1322 | 0.689 | 97  | 1677 |
| W1740    | 1.87  | Or-I   | India                | 803  | 0.300 | 1878 | 0.700 | 4   | 1007 |
| W0151    | 1.7   | Or-I   | India                | 685  | 0.295 | 1634 | 0.705 | 7   | 1366 |
| W1743    | 1.06  | Or-I   | India                | 556  | 0.289 | 1365 | 0.711 | 1   | 1770 |
| W0234    | 1.78  | Or-II  | Thailand             | 705  | 0.288 | 1744 | 0.712 | 11  | 1232 |
| W1858    | 1.14  | Or-II  | Thailand             | 581  | 0.286 | 1451 | 0.714 | 37  | 1623 |
| W1927    | 1.17  | Or-II  | Thailand             | 573  | 0.278 | 1489 | 0.722 | 109 | 1521 |
| W0639    | 0.61  | Or-I   | Burma                | 337  | 0.274 | 892  | 0.726 | 6   | 2457 |
| W1080    | 1.04  | Or-I   | India                | 501  | 0.274 | 1329 | 0.726 | 61  | 1801 |
| W1753    | 1.28  | Or-I   | India                | 607  | 0.271 | 1630 | 0.729 | 4   | 1451 |
| W1741    | 1.19  | Or-I   | India                | 569  | 0.267 | 1562 | 0.733 | 1   | 1560 |
| W2277    | 1.13  | Or-I   | Thailand             | 554  | 0.266 | 1531 | 0.734 | 1   | 1606 |
| HK47     | 15.54 | -      | Madhya Pradesh;India | 951  | 0.265 | 2631 | 0.735 | 35  | 75   |
| W0170    | 1.6   | Or-I   | Thailand             | 554  | 0.257 | 1604 | 0.743 | 8   | 1526 |
| W2263    | 1.47  | Or-I   | Cambodia             | 525  | 0.254 | 1544 | 0.746 | 5   | 1618 |
| W1762    | 0.75  | Or-I   | India                | 390  | 0.253 | 1151 | 0.747 |     | 2151 |
| W1687    | 1.95  | Or-II  | India                | 529  | 0.252 | 1570 | 0.748 | 331 | 1262 |
| W0106    | 1.77  | Or-I   | India                | 621  | 0.252 | 1846 | 0.748 | 7   | 1218 |
| W1866    | 1.39  | Or-I   | Thailand             | 598  | 0.252 | 1778 | 0.748 | 14  | 1302 |
| W1832    | 1.32  | Or-I   | Thailand             | 594  | 0.251 | 1769 | 0.749 | 4   | 1325 |
| W1736    | 1.55  | Or-II  | India                | 556  | 0.251 | 1657 | 0.749 | 12  | 1467 |

|       |      |       |          |     |       |      |       |      |      |
|-------|------|-------|----------|-----|-------|------|-------|------|------|
| W1698 | 1.48 | Or-I  | Thailand | 535 | 0.251 | 1599 | 0.749 | 2    | 1556 |
| W0633 | 0.42 | Or-I  | Burma    | 216 | 0.251 | 646  | 0.749 | 3    | 2827 |
| W1533 | 0.79 | Or-I  | India    | 380 | 0.250 | 1138 | 0.750 | 1    | 2173 |
| W1546 | 0.93 | Or-I  | Thailand | 428 | 0.249 | 1291 | 0.751 | 1    | 1972 |
| W2265 | 2.51 | Or-I  | Laos     | 742 | 0.249 | 2239 | 0.751 | 4    | 707  |
| W1551 | 1.38 | Or-I  | Thailand | 516 | 0.249 | 1559 | 0.751 | 10   | 1607 |
| W2303 | 1.28 | Or-I  | Laos     | 567 | 0.248 | 1715 | 0.752 | 3    | 1407 |
| W0121 | 0.88 | Or-I  | India    | 332 | 0.245 | 1024 | 0.755 | 155  | 2181 |
| W1853 | 1.19 | Or-I  | Thailand | 522 | 0.244 | 1614 | 0.756 | 1    | 1555 |
| W1747 | 1.2  | Or-I  | India    | 528 | 0.244 | 1633 | 0.756 | 2    | 1529 |
| W1738 | 1.75 | Or-I  | India    | 568 | 0.244 | 1760 | 0.756 | 7    | 1357 |
| W1865 | 1.1  | Or-I  | Thailand | 495 | 0.242 | 1547 | 0.758 | 9    | 1641 |
| W0107 | 1.85 | Or-I  | India    | 604 | 0.242 | 1891 | 0.758 | 7    | 1190 |
| W2296 | 1.29 | Or-I  | Cambodia | 522 | 0.242 | 1638 | 0.758 | 7    | 1525 |
| W2310 | 2.03 | Or-II | Laos     | 667 | 0.242 | 2094 | 0.758 | 44   | 887  |
| W1555 | 0.8  | Or-II | Thailand | 376 | 0.241 | 1182 | 0.759 | 10   | 2124 |
| W1685 | 1.17 | Or-I  | India    | 434 | 0.240 | 1372 | 0.760 | 3    | 1883 |
| W1727 | 1.22 | Or-I  | Thailand | 470 | 0.240 | 1487 | 0.760 | 4    | 1731 |
| W1749 | 1.25 | Or-I  | India    | 520 | 0.239 | 1653 | 0.761 |      | 1519 |
| W1619 | 0.9  | Or-I  | Thailand | 387 | 0.239 | 1231 | 0.761 |      | 2074 |
| W1912 | 1.48 | Or-I  | Thailand | 552 | 0.239 | 1760 | 0.761 | 8    | 1372 |
| W1726 | 1.18 | Or-I  | Thailand | 453 | 0.238 | 1447 | 0.762 | 3    | 1789 |
| W0630 | 0.73 | Or-I  | Burma    | 313 | 0.237 | 1008 | 0.763 |      | 2371 |
| W0168 | 1.41 | Or-I  | Thailand | 509 | 0.236 | 1644 | 0.764 | 4    | 1535 |
| W2275 | 0.79 | Or-I  | Thailand | 378 | 0.233 | 1243 | 0.767 | 2    | 2069 |
| W2304 | 2.38 | Or-I  | Laos     | 696 | 0.233 | 2291 | 0.767 | 8    | 697  |
| W0574 | 1.95 | Or-I  | Malaya   | 611 | 0.232 | 2017 | 0.768 | 9    | 1055 |
| W3067 | 3.4  | Or-II | Hainan   | 489 | 0.232 | 1617 | 0.768 | 1028 | 558  |
| W1547 | 1.48 | Or-I  | Thailand | 503 | 0.231 | 1670 | 0.769 | 4    | 1515 |
| W3105 | 8.36 | Or-I  | India    | 827 | 0.231 | 2757 | 0.769 | 14   | 94   |
| W1700 | 0.91 | Or-I  | Thailand | 369 | 0.230 | 1237 | 0.770 | 4    | 2082 |
| W1921 | 1.04 | Or-I  | Thailand | 458 | 0.227 | 1557 | 0.773 | 5    | 1672 |
| W1754 | 1.93 | Or-I  | India    | 620 | 0.227 | 2112 | 0.773 | 4    | 956  |
| W1731 | 1.31 | Or-I  | India    | 459 | 0.227 | 1566 | 0.773 | 9    | 1658 |
| W0638 | 1    | Or-I  | Burma    | 366 | 0.224 | 1268 | 0.776 | 4    | 2054 |
| W1681 | 0.85 | Or-I  | India    | 341 | 0.224 | 1182 | 0.776 | 2    | 2167 |
| W1792 | 2.42 | Or-I  | Thailand | 649 | 0.224 | 2250 | 0.776 | 17   | 776  |
| W2307 | 2.33 | Or-I  | Laos     | 659 | 0.224 | 2285 | 0.776 | 4    | 744  |
| W0124 | 0.86 | Or-I  | India    | 332 | 0.224 | 1152 | 0.776 | 1    | 2207 |
| W2268 | 1.5  | Or-I  | Thailand | 544 | 0.224 | 1890 | 0.776 | 7    | 1251 |
| W0101 | 1.37 | Or-I  | India    | 475 | 0.223 | 1651 | 0.777 | 5    | 1561 |
| W0102 | 1.19 | Or-I  | India    | 424 | 0.223 | 1474 | 0.777 | 9    | 1785 |
| W0627 | 1.01 | Or-I  | Burma    | 375 | 0.223 | 1304 | 0.777 | 4    | 2009 |

|           |       |       |                 |     |       |      |       |      |      |
|-----------|-------|-------|-----------------|-----|-------|------|-------|------|------|
| W1557     | 0.62  | Or-II | Thailand        | 277 | 0.223 | 965  | 0.777 | 8    | 2442 |
| W1532     | 0.81  | Or-I  | India           | 344 | 0.222 | 1208 | 0.778 | 2    | 2138 |
| W3072     | 4.33  | Or-II | Hainan          | 438 | 0.221 | 1542 | 0.779 | 1363 | 349  |
| W1925     | 0.83  | Or-I  | Thailand        | 316 | 0.221 | 1117 | 0.779 | 4    | 2255 |
| W1757     | 3.41  | Or-I  | India           | 709 | 0.220 | 2516 | 0.780 | 6    | 461  |
| W1852     | 1.36  | Or-I  | Thailand        | 495 | 0.219 | 1764 | 0.781 | 53   | 1380 |
| W0631     | 0.4   | Or-I  | Burma           | 184 | 0.217 | 664  | 0.783 |      | 2844 |
| W2306     | 2.74  | Or-I  | Laos            | 651 | 0.213 | 2410 | 0.787 | 19   | 612  |
| W2305     | 1.44  | Or-I  | Laos            | 498 | 0.212 | 1850 | 0.788 | 12   | 1332 |
| W0589     | 1.03  | Or-I  | Malaya          | 376 | 0.212 | 1400 | 0.788 | 1    | 1915 |
| W0626     | 1.17  | Or-I  | Burma           | 371 | 0.212 | 1382 | 0.788 | 1    | 1938 |
| W1787     | 1.53  | Or-I  | Thailand        | 516 | 0.211 | 1933 | 0.789 | 8    | 1235 |
| W0130     | 0.9   | Or-I  | India           | 330 | 0.209 | 1246 | 0.791 | 2    | 2114 |
| W1121     | 0.94  | Or-I  | India           | 317 | 0.209 | 1201 | 0.791 | 4    | 2170 |
| W0148     | 1.39  | Or-I  | India           | 443 | 0.209 | 1679 | 0.791 | 4    | 1566 |
| W1083     | 1.28  | Or-I  | India           | 429 | 0.207 | 1646 | 0.793 | 6    | 1611 |
| W1084     | 1.36  | Or-I  | India           | 442 | 0.206 | 1703 | 0.794 | 6    | 1541 |
| W1142     | 0.95  | Or-I  | India           | 338 | 0.206 | 1304 | 0.794 | 5    | 2045 |
| W1105     | 1.39  | Or-I  | India           | 443 | 0.205 | 1716 | 0.795 | 7    | 1526 |
| W0123     | 0.17  | Or-I  | India           | 73  | 0.204 | 285  | 0.796 |      | 3334 |
| W0605     | 0.8   | Or-I  | Malaya          | 302 | 0.203 | 1183 | 0.797 | 1    | 2206 |
| W1676     | 1.01  | Or-I  | India           | 340 | 0.202 | 1343 | 0.798 | 6    | 2003 |
| W1928     | 0.95  | Or-I  | Thailand        | 312 | 0.201 | 1241 | 0.799 | 34   | 2105 |
| W1879     | 1.21  | Or-I  | Thailand        | 428 | 0.198 | 1735 | 0.802 | 28   | 1501 |
| W1770     | 1.05  | Or-I  | India           | 387 | 0.198 | 1571 | 0.802 | 1    | 1733 |
| W1143     | 0.68  | Or-I  | India           | 244 | 0.197 | 995  | 0.803 |      | 2453 |
| 042_87_34 | 19.15 | -     | Dhoni;India     | 527 | 0.195 | 2175 | 0.805 | 915  | 75   |
| W1082     | 1.33  | Or-I  | India           | 417 | 0.194 | 1729 | 0.806 |      | 1546 |
| W0173     | 1.7   | Or-I  | Thailand        | 456 | 0.192 | 1915 | 0.808 | 4    | 1317 |
| W0152     | 1.57  | Or-I  | India           | 420 | 0.192 | 1766 | 0.808 | 3    | 1503 |
| L89_12    | 16.34 | -     | Vientiane;Laos  | 682 | 0.190 | 2899 | 0.810 | 46   | 65   |
| W1795     | 1.93  | Or-I  | Thailand        | 506 | 0.190 | 2154 | 0.810 | 10   | 1022 |
| W1873     | 0.67  | Or-II | Thailand        | 287 | 0.190 | 1223 | 0.810 | 26   | 2156 |
| W1124     | 2.11  | Or-II | India           | 467 | 0.190 | 1995 | 0.810 | 6    | 1224 |
| W2271     | 1.42  | Or-I  | Thailand        | 445 | 0.189 | 1913 | 0.811 | 2    | 1332 |
| W2193     | 1.35  | Or-I  | India           | 410 | 0.189 | 1764 | 0.811 | 8    | 1510 |
| W0147     | 0.14  | Or-I  | India           | 62  | 0.182 | 279  | 0.818 |      | 3351 |
| W1751     | 0.62  | Or-I  | India           | 239 | 0.177 | 1111 | 0.823 |      | 2342 |
| MV89_80   | 18.25 | -     | Medinipur;India | 613 | 0.172 | 2944 | 0.828 | 41   | 94   |
| W1295     | 0.92  | Or-I  | Cambodia        | 280 | 0.171 | 1358 | 0.829 | 16   | 2038 |
| W2298     | 0.79  | Or-I  | Laos            | 255 | 0.169 | 1250 | 0.831 | 2    | 2185 |
| W2299     | 1.23  | Or-I  | Laos            | 348 | 0.169 | 1710 | 0.831 | 5    | 1629 |
| W1788     | 2.7   | Or-I  | Thailand        | 492 | 0.164 | 2503 | 0.836 | 3    | 694  |

|           |       |        |           |     |       |      |       |      |      |
|-----------|-------|--------|-----------|-----|-------|------|-------|------|------|
| W0145     | 0.22  | Or-II  | Thailand  | 84  | 0.164 | 428  | 0.836 | 1    | 3179 |
| W2302     | 2.31  | Or-I   | Laos      | 469 | 0.162 | 2429 | 0.838 | 4    | 790  |
| W1893     | 1.28  | Or-I   | Thailand  | 330 | 0.159 | 1744 | 0.841 | 1    | 1617 |
| IRGC88812 | 71.5  | -      | Laos      | 573 | 0.157 | 3078 | 0.843 | 26   | 15   |
| W1679     | 1.21  | Or-I   | India     | 301 | 0.154 | 1658 | 0.846 | 4    | 1729 |
| W2301     | 1.68  | Or-I   | Laos      | 390 | 0.153 | 2151 | 0.847 | 12   | 1139 |
| W1914     | 2.67  | Or-I   | Thailand  | 424 | 0.152 | 2370 | 0.848 | 13   | 885  |
| W3003     | 0.38  | Or-II  | Guangdong | 127 | 0.144 | 752  | 0.856 | 24   | 2789 |
| W1695     | 1.04  | Or-I   | Thailand  | 256 | 0.144 | 1519 | 0.856 |      | 1917 |
| W1690     | 1.24  | Or-I   | Thailand  | 274 | 0.144 | 1629 | 0.856 | 2    | 1787 |
| W1737     | 1.02  | Or-I   | India     | 248 | 0.141 | 1506 | 0.859 | 5    | 1933 |
| W0587     | 1.15  | Or-II  | Malaya    | 268 | 0.141 | 1631 | 0.859 | 34   | 1759 |
| W1742     | 1.44  | Or-II  | India     | 316 | 0.140 | 1942 | 0.860 | 47   | 1387 |
| W0635     | 0.49  | Or-II  | Burma     | 125 | 0.140 | 770  | 0.860 |      | 2797 |
| W2276     | 1.18  | Or-II  | Thailand  | 272 | 0.135 | 1739 | 0.865 | 9    | 1672 |
| W0176     | 1.17  | Or-I   | Thailand  | 241 | 0.122 | 1732 | 0.878 | 1    | 1718 |
| W2311     | 1.92  | Or-II  | Laos      | 264 | 0.122 | 1899 | 0.878 | 62   | 1467 |
| W2278     | 2.33  | Or-I   | Thailand  | 300 | 0.115 | 2318 | 0.885 | 292  | 782  |
| W1750     | 1.77  | Or-I   | India     | 281 | 0.108 | 2323 | 0.892 | 11   | 1077 |
| W1668     | 1.19  | Or-III | India     | 181 | 0.096 | 1699 | 0.904 | 20   | 1792 |
| W1881     | 1.09  | Or-I   | Thailand  | 163 | 0.090 | 1651 | 0.910 | 41   | 1837 |
| W0632     | 1.04  | Or-I   | Burma     | 161 | 0.090 | 1632 | 0.910 | 3    | 1896 |
| W1761     | 1.11  | Or-I   | India     | 183 | 0.089 | 1878 | 0.911 | 14   | 1617 |
| W1735     | 1.51  | Or-I   | India     | 179 | 0.081 | 2030 | 0.919 | 15   | 1468 |
| W0610     | 0.61  | Or-I   | Burma     | 97  | 0.080 | 1123 | 0.920 | 2    | 2470 |
| W1107     | 1.42  | Or-I   | India     | 170 | 0.076 | 2053 | 0.924 | 3    | 1466 |
| W0103     | 0.94  | Or-I   | India     | 119 | 0.072 | 1538 | 0.928 | 2    | 2033 |
| W1666     | 0.58  | Or-I   | India     | 80  | 0.067 | 1112 | 0.933 | 10   | 2490 |
| W1970     | 1.22  | Or-I   | Indonesia | 124 | 0.066 | 1759 | 0.934 | 69   | 1740 |
| W2269     | 0.99  | Or-I   | Thailand  | 118 | 0.065 | 1703 | 0.935 | 11   | 1860 |
| W0128     | 2.14  | Or-I   | India     | 156 | 0.062 | 2379 | 0.938 | 200  | 957  |
| W1696     | 0.54  | Or-I   | Thailand  | 60  | 0.056 | 1018 | 0.944 | 6    | 2608 |
| W1794     | 1.68  | Or-I   | Thailand  | 133 | 0.052 | 2424 | 0.948 | 3    | 1132 |
| W0590     | 1.71  | Or-I   | Malaya    | 99  | 0.042 | 2238 | 0.958 | 80   | 1275 |
| W1677     | 2.09  | Or-I   | India     | 73  | 0.029 | 2425 | 0.971 | 30   | 1164 |
| W0178     | 0.85  | Or-I   | Thailand  | 39  | 0.025 | 1528 | 0.975 | 1    | 2124 |
| W1112     | 0.66  | Or-I   | India     | 27  | 0.022 | 1179 | 0.978 |      | 2486 |
| CA97_053  | 16.62 | -      | Cambodia  | 55  | 0.021 | 2556 | 0.979 | 1008 | 73   |
| W0179     | 0.88  | Or-I   | Thailand  | 33  | 0.021 | 1576 | 0.979 | 1    | 2082 |
| W1935     | 0.76  | Or-I   | Thailand  | 26  | 0.018 | 1382 | 0.982 | 5    | 2279 |
| W1092     | 1.17  | Or-I   | India     | 36  | 0.018 | 1981 | 0.982 | 2    | 1673 |
| W1111     | 1.53  | Or-I   | India     | 32  | 0.014 | 2196 | 0.986 | 7    | 1457 |
| W1559     | 3.92  | Or-I   | Thailand  | 40  | 0.013 | 2983 | 0.987 | 159  | 510  |

|       |      |      |       |   |       |      |       |   |      |
|-------|------|------|-------|---|-------|------|-------|---|------|
| W1675 | 1.05 | Or-I | India | 5 | 0.003 | 1781 | 0.997 | 2 | 1904 |
| W1090 | 0.24 | Or-I | India | 1 | 0.002 | 588  | 0.998 | 3 | 3100 |
| W1117 | 1.32 | Or-I | India | 3 | 0.002 | 1974 | 0.998 | 3 | 1712 |
| W1086 | 1.33 | Or-I | India | 3 | 0.001 | 2166 | 0.999 | 2 | 1521 |

1, Clades were classified by Huang et al.,2012

**Huang X, Kurata N, Wei X, Wang ZX, Wang A, Zhao Q, Zhao Y, Liu K, Lu H, Li W, et al. 2012.** A map of rice genome variation reveals the origin of cultivated rice. *Nature* **490**(7421): 497-501.

**Table S6** SNP genotype of DR-II. We genotyped all the SNPs within DR-II regions and classified them as Cultivar type or Wild type.

| Individual | Depth | Clade <sup>1</sup> | Original place      | Cultivar_Type | %     | Hete | Unmap |
|------------|-------|--------------------|---------------------|---------------|-------|------|-------|
| W1086      | 1.35  | Or-I               | India               | 10506         | 0.998 | 87   | 8243  |
| W0178      | 0.84  | Or-I               | Thailand            | 8112          | 0.997 | 45   | 10677 |
| W1090      | 0.23  | Or-I               | India               | 2757          | 0.996 | 6    | 16086 |
| CA97_053   | 17.2  | -                  | Sopoir Tep;Cambodia | 15086         | 0.995 | 3243 | 461   |
| W0639      | 0.58  | Or-I               | Burma               | 5988          | 0.995 | 26   | 12818 |
| W1092      | 1.2   | Or-I               | India               | 9889          | 0.995 | 101  | 8822  |
| W0638      | 1.06  | Or-I               | Burma               | 8682          | 0.995 | 94   | 10041 |
| W1675      | 1.08  | Or-I               | India               | 9255          | 0.995 | 66   | 9493  |
| W0179      | 0.92  | Or-I               | Thailand            | 8633          | 0.995 | 91   | 10091 |
| W1080      | 1.11  | Or-I               | India               | 9575          | 0.994 | 77   | 9156  |
| W1111      | 1.61  | Or-I               | India               | 11587         | 0.994 | 186  | 7017  |
| W1112      | 0.72  | Or-I               | India               | 6606          | 0.992 | 42   | 12163 |
| W0234      | 1.9   | Or-II              | Thailand            | 12688         | 0.991 | 188  | 5875  |
| W1117      | 1.41  | Or-I               | India               | 10145         | 0.991 | 145  | 8483  |
| W0606      | 1.2   | Or-II              | Malaya              | 9165          | 0.991 | 108  | 9506  |
| W0103      | 0.97  | Or-I               | India               | 7961          | 0.988 | 87   | 10720 |
| W1295      | 0.89  | Or-I               | Cambodia            | 8356          | 0.988 | 75   | 10330 |
| W0632      | 1.08  | Or-I               | Burma               | 8596          | 0.987 | 109  | 10040 |
| W0637      | 0.77  | Or-III             | Burma               | 6981          | 0.985 | 27   | 11750 |
| W1559      | 3.9   | Or-I               | Thailand            | 14556         | 0.985 | 972  | 3108  |
| W1119      | 1.44  | Or-III             | India               | 9946          | 0.985 | 160  | 8599  |
| W3094      | 2.83  | Or-III             | Yangzi              | 14794         | 0.984 | 605  | 3228  |
| W1751      | 0.68  | Or-I               | India               | 7384          | 0.984 | 28   | 11329 |
| 042_87_34  | 18.82 | -                  | Dhoni;India         | 14394         | 0.983 | 3061 | 1163  |
| W1107      | 1.48  | Or-I               | India               | 10747         | 0.983 | 108  | 7824  |
| W3091      | 1.64  | Or-II              | Yangzi              | 11934         | 0.983 | 279  | 6440  |
| W3072      | 4.26  | Or-II              | Hainan              | 14808         | 0.983 | 1053 | 2741  |
| W1858      | 1.16  | Or-II              | Thailand            | 10749         | 0.982 | 99   | 7817  |
| W2036      | 1.19  | Or-III             | Burma               | 10645         | 0.982 | 101  | 7920  |
| W3023      | 1.41  | Or-III             | Guangdong           | 10739         | 0.982 | 299  | 7626  |
| DAL_DHAN   | 18.54 | -                  | Chakaria;Bangladesh | 15027         | 0.981 | 2686 | 852   |
| W3025      | 0.43  | Or-III             | Guangdong           | 5255          | 0.979 | 69   | 13425 |
| W0594      | 1.27  | Or-II              | Malaya              | 9647          | 0.979 | 185  | 8822  |
| W3067      | 3.37  | Or-II              | Hainan              | 14095         | 0.979 | 864  | 3599  |
| W1725      | 5.3   | Or-III             | Thailand            | 15515         | 0.978 | 742  | 2260  |
| W1741      | 1.17  | Or-I               | India               | 10994         | 0.978 | 103  | 7520  |
| W1102      | 0.74  | Or-III             | India               | 6574          | 0.978 | 97   | 12041 |
| W3041      | 2.97  | Or-III             | Guangxi             | 13675         | 0.977 | 200  | 4669  |
| W3030      | 2.3   | Or-III             | Guangdong           | 14653         | 0.977 | 674  | 3186  |

|       |       |        |              |       |       |      |       |
|-------|-------|--------|--------------|-------|-------|------|-------|
| W3006 | 1.47  | Or-III | Guangdong    | 10404 | 0.976 | 145  | 8059  |
| P46   | 14.95 | -      | Hainan,China | 16238 | 0.975 | 1261 | 938   |
| W1742 | 1.45  | Or-II  | India        | 11367 | 0.972 | 191  | 6974  |
| W3068 | 1.54  | Or-II  | Hainan       | 10444 | 0.972 | 324  | 7788  |
| W1935 | 0.82  | Or-I   | Thailand     | 8015  | 0.971 | 99   | 10508 |
| W3044 | 3.33  | Or-III | Guangxi      | 13828 | 0.970 | 567  | 4042  |
| W3035 | 0.84  | Or-III | Guangdong    | 8964  | 0.970 | 119  | 9503  |
| W1666 | 0.62  | Or-I   | India        | 6061  | 0.970 | 62   | 12551 |
| W1735 | 1.51  | Or-I   | India        | 10490 | 0.970 | 98   | 7944  |
| W1668 | 1.21  | Or-III | India        | 9606  | 0.969 | 109  | 8840  |
| W3043 | 2.19  | Or-III | Guangxi      | 12018 | 0.969 | 377  | 6082  |
| W1757 | 3.32  | Or-I   | India        | 15101 | 0.969 | 260  | 3016  |
| W3001 | 0.61  | Or-III | Guangdong    | 6223  | 0.968 | 67   | 12368 |
| W0596 | 0.98  | Or-II  | Malaya       | 8277  | 0.968 | 195  | 10115 |
| W3021 | 1.37  | Or-III | Guangdong    | 10450 | 0.968 | 350  | 7715  |
| W1093 | 4.86  | Or-II  | India        | 13666 | 0.968 | 1131 | 3611  |
| W3022 | 1.48  | Or-III | Guangdong    | 10786 | 0.968 | 302  | 7415  |
| W0176 | 1.17  | Or-I   | Thailand     | 9211  | 0.967 | 66   | 9274  |
| W1756 | 0.92  | Or-I   | India        | 9151  | 0.967 | 126  | 9274  |
| W3010 | 2.47  | Or-III | Guangdong    | 12725 | 0.967 | 630  | 5069  |
| W0610 | 0.63  | Or-I   | Burma        | 6126  | 0.967 | 40   | 12483 |
| W3007 | 2.59  | Or-III | Guangdong    | 13156 | 0.967 | 557  | 4692  |
| W3002 | 2.6   | Or-III | Guangdong    | 13473 | 0.966 | 504  | 4407  |
| W3004 | 1.77  | Or-III | Guangdong    | 11562 | 0.966 | 368  | 6521  |
| W3013 | 1.55  | Or-III | Guangdong    | 11173 | 0.966 | 264  | 7027  |
| W1740 | 1.82  | Or-I   | India        | 12933 | 0.966 | 146  | 5322  |
| W3050 | 3.4   | Or-III | Guangxi      | 13895 | 0.965 | 542  | 3918  |
| W1943 | 20.8  | Or-III | Jiangxi      | 17305 | 0.964 | 536  | 370   |
| W3033 | 1.08  | Or-III | Guangdong    | 9635  | 0.964 | 292  | 8571  |
| W3045 | 1.77  | Or-III | Guangdong    | 10871 | 0.963 | 239  | 7332  |
| W3028 | 2.35  | Or-III | Guangxi      | 12085 | 0.963 | 424  | 5882  |
| W0145 | 0.25  | Or-II  | Thailand     | 2344  | 0.962 | 7    | 16418 |
| W1732 | 1.21  | Or-III | India        | 8658  | 0.962 | 104  | 9755  |
| W3074 | 2.49  | Or-III | Hainan       | 12512 | 0.962 | 272  | 5576  |
| W0587 | 1.24  | Or-II  | Malaya       | 9361  | 0.961 | 121  | 9004  |
| W1750 | 1.77  | Or-I   | India        | 12360 | 0.961 | 249  | 5755  |
| W0121 | 0.87  | Or-I   | India        | 7410  | 0.961 | 211  | 10938 |
| W3024 | 0.47  | Or-III | Guangdong    | 5043  | 0.961 | 83   | 13529 |
| W3079 | 1.45  | Or-III | Yangzi       | 11289 | 0.961 | 257  | 6852  |
| W3040 | 1.48  | Or-III | Guangdong    | 11993 | 0.960 | 331  | 6041  |
| W3082 | 1.36  | Or-III | Yangzi       | 11406 | 0.960 | 265  | 6715  |
| W3081 | 0.88  | Or-III | Yangzi       | 8981  | 0.960 | 137  | 9366  |
| W3080 | 1.53  | Or-III | Yangzi       | 11483 | 0.960 | 248  | 6647  |

|       |      |        |           |       |       |      |       |
|-------|------|--------|-----------|-------|-------|------|-------|
| W3015 | 1.68 | Or-III | Guangdong | 11324 | 0.959 | 311  | 6746  |
| W3078 | 0.94 | Or-III | Yangzi    | 9313  | 0.958 | 120  | 9024  |
| W3092 | 2.44 | Or-III | Yangzi    | 13418 | 0.958 | 436  | 4418  |
| W3026 | 0.7  | Or-III | Guangdong | 6423  | 0.958 | 117  | 12038 |
| W3052 | 3.26 | Or-III | Guangxi   | 13176 | 0.958 | 851  | 4251  |
| W3060 | 1.56 | Or-III | Hainan    | 11446 | 0.958 | 465  | 6442  |
| W2311 | 2.1  | Or-II  | Laos      | 11199 | 0.957 | 218  | 6936  |
| W3042 | 1.38 | Or-III | Guangxi   | 9272  | 0.956 | 272  | 8893  |
| W3014 | 3    | Or-III | Guangdong | 13426 | 0.956 | 379  | 4441  |
| W3039 | 0.91 | Or-III | Guangdong | 8843  | 0.956 | 80   | 9532  |
| W2193 | 1.37 | Or-I   | India     | 10266 | 0.956 | 124  | 7996  |
| W1534 | 0.56 | Or-III | India     | 5710  | 0.956 | 60   | 12826 |
| W2269 | 1.02 | Or-I   | Thailand  | 8815  | 0.955 | 147  | 9486  |
| W1114 | 1.05 | Or-III | India     | 7781  | 0.955 | 68   | 10646 |
| W3019 | 0.64 | Or-III | Guangdong | 6567  | 0.955 | 157  | 11826 |
| W0574 | 1.96 | Or-I   | Malaya    | 11501 | 0.955 | 147  | 6667  |
| W3005 | 0.95 | Or-III | Guangdong | 8242  | 0.954 | 125  | 10100 |
| W3049 | 3.23 | Or-III | Guangxi   | 12484 | 0.954 | 857  | 4912  |
| W1737 | 0.94 | Or-I   | India     | 7565  | 0.953 | 69   | 10858 |
| W3105 | 8.26 | Or-I   | India     | 16803 | 0.953 | 264  | 973   |
| W3095 | 1.48 | Or-III | Yangzi    | 11107 | 0.953 | 186  | 7020  |
| W3027 | 3.32 | Or-III | Guangxi   | 13413 | 0.953 | 945  | 3835  |
| W3000 | 0.88 | Or-III | Guangdong | 8100  | 0.952 | 173  | 10183 |
| W1983 | 1.76 | Or-I   | India     | 11585 | 0.952 | 267  | 6422  |
| W3046 | 4.08 | Or-III | Guangdong | 13470 | 0.952 | 963  | 3745  |
| W3077 | 0.6  | Or-III | Yangzi    | 6638  | 0.951 | 52   | 11832 |
| W1788 | 2.58 | Or-I   | Thailand  | 13170 | 0.951 | 205  | 4813  |
| W1542 | 0.94 | Or-III | Malaya    | 7442  | 0.951 | 80   | 10957 |
| W3038 | 1.12 | Or-III | Guangdong | 10475 | 0.951 | 162  | 7683  |
| W1715 | 4.5  | Or-II  | China     | 13630 | 0.950 | 1187 | 3332  |
| W3075 | 1.42 | Or-III | Yangzi    | 11753 | 0.950 | 360  | 6134  |
| W3076 | 0.41 | Or-III | Yangzi    | 4939  | 0.950 | 54   | 13608 |
| W3037 | 0.89 | Or-III | Guangdong | 8675  | 0.949 | 165  | 9554  |
| W1928 | 1.07 | Or-I   | Thailand  | 8625  | 0.949 | 268  | 9503  |
| W3011 | 1.18 | Or-III | Guangdong | 8808  | 0.949 | 284  | 9293  |
| W1105 | 1.38 | Or-I   | India     | 9606  | 0.948 | 115  | 8618  |
| W1560 | 1.25 | Or-III | Thailand  | 9249  | 0.948 | 137  | 8968  |
| W0141 | 0.91 | Or-III | India     | 6596  | 0.948 | 87   | 11816 |
| W2007 | 1.3  | Or-III | India     | 9947  | 0.948 | 154  | 8213  |
| W1852 | 1.35 | Or-I   | Thailand  | 10982 | 0.948 | 264  | 7010  |
| W0631 | 0.4  | Or-I   | Burma     | 3893  | 0.947 | 12   | 14740 |
| W1124 | 2.07 | Or-II  | India     | 11457 | 0.947 | 157  | 6602  |
| W2008 | 1.39 | Or-III | India     | 10050 | 0.947 | 152  | 8093  |



|       |      |        |           |       |       |      |       |
|-------|------|--------|-----------|-------|-------|------|-------|
| W3093 | 0.24 | Or-III | Yangzi    | 2896  | 0.946 | 4    | 15797 |
| W1087 | 5.94 | Or-II  | India     | 13661 | 0.946 | 1172 | 3248  |
| W0130 | 0.75 | Or-I   | India     | 6098  | 0.945 | 50   | 12361 |
| W3020 | 1.41 | Or-III | Guangdong | 9626  | 0.945 | 493  | 8180  |
| W3034 | 1.7  | Or-III | Guangdong | 12312 | 0.945 | 638  | 5191  |
| W0589 | 0.98 | Or-I   | Malaya    | 8024  | 0.945 | 88   | 10279 |
| W3096 | 0.82 | Or-III | Yangzi    | 7612  | 0.945 | 64   | 10739 |
| W2198 | 3.74 | Or-III | China     | 14377 | 0.945 | 574  | 3067  |
| W1669 | 3.12 | Or-III | India     | 14069 | 0.944 | 718  | 3247  |
| W0157 | 0.96 | Or-II  | India     | 7285  | 0.944 | 89   | 11057 |
| W0175 | 3.38 | Or-II  | Thailand  | 12990 | 0.944 | 390  | 4714  |
| W1121 | 0.96 | Or-I   | India     | 7342  | 0.944 | 86   | 10998 |
| W3047 | 3.23 | Or-III | Guangxi   | 12566 | 0.944 | 1267 | 4283  |
| W1292 | 0.83 | Or-II  | Indonesia | 7030  | 0.943 | 132  | 11277 |
| W1762 | 0.7  | Or-I   | India     | 6630  | 0.943 | 57   | 11775 |
| W3009 | 1.84 | Or-III | Guangdong | 10820 | 0.943 | 367  | 7018  |
| W0590 | 1.68 | Or-I   | Malaya    | 10472 | 0.943 | 198  | 7554  |
| W0151 | 1.56 | Or-I   | India     | 9891  | 0.942 | 128  | 8228  |
| W3016 | 0.53 | Or-III | Guangdong | 6035  | 0.941 | 78   | 12371 |
| W1143 | 0.65 | Or-I   | India     | 5685  | 0.941 | 29   | 12789 |
| W1748 | 5.42 | Or-III | India     | 13159 | 0.941 | 1839 | 3033  |
| W3051 | 2.4  | Or-III | Guangxi   | 11380 | 0.940 | 723  | 6029  |
| W0128 | 2.01 | Or-I   | India     | 10630 | 0.939 | 639  | 6906  |
| W1753 | 1.24 | Or-I   | India     | 10131 | 0.939 | 166  | 7907  |
| W1084 | 1.28 | Or-I   | India     | 9338  | 0.939 | 178  | 8738  |
| W1083 | 1.18 | Or-I   | India     | 8851  | 0.938 | 193  | 9234  |
| W1532 | 0.81 | Or-I   | India     | 7149  | 0.937 | 44   | 11188 |
| W3048 | 3.66 | Or-III | Guangxi   | 13553 | 0.937 | 394  | 3998  |
| W1677 | 2.07 | Or-I   | India     | 11180 | 0.937 | 233  | 6691  |
| W1795 | 1.87 | Or-I   | Thailand  | 11377 | 0.936 | 459  | 6246  |
| W1082 | 1.25 | Or-I   | India     | 9087  | 0.936 | 168  | 8983  |
| W3018 | 1.33 | Or-III | Guangdong | 9261  | 0.936 | 277  | 8686  |
| W3036 | 0.47 | Or-III | Guangdong | 5307  | 0.935 | 93   | 13095 |
| W0126 | 1.36 | Or-III | India     | 9039  | 0.935 | 121  | 9072  |
| W1738 | 1.63 | Or-I   | India     | 10096 | 0.934 | 194  | 7862  |
| W3031 | 1.13 | Or-III | Guangxi   | 9729  | 0.933 | 346  | 8090  |
| W2278 | 2.39 | Or-I   | Thailand  | 12716 | 0.933 | 518  | 4714  |
| W1927 | 1.22 | Or-II  | Thailand  | 9419  | 0.933 | 194  | 8568  |
| W1687 | 1.82 | Or-II  | India     | 9911  | 0.933 | 542  | 7692  |
| W1553 | 0.97 | Or-II  | Thailand  | 7092  | 0.932 | 194  | 11061 |
| W0621 | 1.27 | Or-III | Burma     | 8375  | 0.932 | 80   | 9792  |
| W0163 | 3.18 | Or-II  | Thailand  | 12663 | 0.931 | 889  | 4376  |
| W1794 | 1.72 | Or-I   | Thailand  | 10445 | 0.931 | 349  | 7292  |

|         |       |        |                 |       |       |      |       |
|---------|-------|--------|-----------------|-------|-------|------|-------|
| W1782   | 2.82  | Or-III | India           | 12773 | 0.930 | 299  | 4832  |
| MV89_80 | 17.93 | -      | Medinipur,India | 15363 | 0.929 | 773  | 1542  |
| W1676   | 0.97  | Or-I   | India           | 7318  | 0.928 | 86   | 10893 |
| W3017   | 1.62  | Or-III | Guangdong       | 10311 | 0.928 | 427  | 7324  |
| W1122   | 2.81  | Or-II  | India           | 12087 | 0.928 | 600  | 5235  |
| W3070   | 3.65  | Or-III | Hainan          | 12727 | 0.927 | 936  | 4198  |
| W0629   | 0.34  | Or-III | Burma           | 3156  | 0.927 | 4    | 15452 |
| W2310   | 1.88  | Or-II  | Laos            | 11696 | 0.927 | 311  | 5927  |
| W3032   | 0.63  | Or-III | Guangxi         | 6737  | 0.926 | 87   | 11501 |
| W0148   | 1.33  | Or-I   | India           | 9049  | 0.925 | 86   | 8993  |
| W3069   | 2.35  | Or-III | Hainan          | 11168 | 0.925 | 618  | 6163  |
| W0625   | 0.45  | Or-III | Burma           | 4050  | 0.924 | 20   | 14460 |
| W3097   | 1.74  | Or-II  | Yangzi          | 10512 | 0.924 | 613  | 6869  |
| W3029   | 0.58  | Or-III | Guangdong       | 5760  | 0.924 | 81   | 12543 |
| W3098   | 1.6   | Or-II  | Yangzi          | 10090 | 0.923 | 536  | 7398  |
| W0147   | 0.14  | Or-I   | India           | 1753  | 0.923 | 4    | 16958 |
| W1739   | 1.09  | Or-III | India           | 8733  | 0.922 | 184  | 9208  |
| W1991   | 1.6   | Or-III | India           | 9415  | 0.922 | 165  | 8484  |
| W2010   | 0.9   | Or-III | India           | 7621  | 0.922 | 79   | 10512 |
| W1998   | 1.83  | Or-III | India           | 10590 | 0.920 | 147  | 7206  |
| W0623   | 0.43  | Or-III | Burma           | 4045  | 0.920 | 15   | 14447 |
| W1989   | 1.07  | Or-III | India           | 7796  | 0.919 | 127  | 10250 |
| W1784   | 0.48  | Or-III | India           | 4625  | 0.919 | 72   | 13755 |
| W3008   | 0.61  | Or-III | Guangdong       | 5854  | 0.918 | 85   | 12401 |
| W3066   | 2.84  | Or-III | Hainan          | 12421 | 0.918 | 334  | 4998  |
| W1890   | 2.92  | Or-II  | Thailand        | 12509 | 0.918 | 686  | 4550  |
| W2003   | 1.64  | Or-III | India           | 10198 | 0.918 | 154  | 7599  |
| W1993   | 1.13  | Or-III | India           | 8402  | 0.918 | 154  | 9555  |
| W2014   | 0.73  | Or-III | India           | 6354  | 0.918 | 63   | 11876 |
| W1759   | 2.26  | Or-III | India           | 10569 | 0.918 | 1107 | 6240  |
| W0173   | 1.61  | Or-I   | Thailand        | 9348  | 0.917 | 137  | 8531  |
| W1761   | 1.03  | Or-I   | India           | 8327  | 0.917 | 119  | 9660  |
| W1556   | 0.97  | Or-II  | Thailand        | 7193  | 0.917 | 284  | 10731 |
| W3065   | 3.38  | Or-III | Hainan          | 11958 | 0.916 | 910  | 4902  |
| W1783   | 0.36  | Or-III | India           | 3482  | 0.916 | 47   | 15011 |
| W1995   | 0.74  | Or-III | India           | 6515  | 0.915 | 108  | 11629 |
| W1746   | 2.02  | Or-III | India           | 10362 | 0.913 | 761  | 6746  |
| W0573   | 1.47  | Or-III | Malaya          | 8478  | 0.912 | 163  | 9407  |
| W1990   | 1.25  | Or-III | India           | 8825  | 0.912 | 192  | 8995  |
| W1914   | 2.53  | Or-I   | Thailand        | 11760 | 0.912 | 294  | 5670  |
| W3073   | 2.74  | Or-III | Hainan          | 11518 | 0.912 | 934  | 5295  |
| W3061   | 1.01  | Or-III | Hainan          | 8506  | 0.912 | 186  | 9345  |
| W1882   | 1.83  | Or-II  | Thailand        | 10670 | 0.912 | 540  | 6617  |

|            |       |        |           |       |       |      |       |
|------------|-------|--------|-----------|-------|-------|------|-------|
| W1696      | 0.5   | Or-I   | Thailand  | 4317  | 0.911 | 69   | 14055 |
| W0138      | 0.76  | Or-III | India     | 5236  | 0.911 | 123  | 12989 |
| W2012      | 0.88  | Or-III | India     | 7124  | 0.911 | 76   | 10962 |
| W0633      | 0.38  | Or-I   | Burma     | 3478  | 0.910 | 9    | 15030 |
| W1873      | 0.68  | Or-II  | Thailand  | 6308  | 0.909 | 135  | 11790 |
| W0172      | 0.91  | Or-III | Thailand  | 6421  | 0.909 | 88   | 11710 |
| W1880      | 2.33  | Or-II  | Thailand  | 11426 | 0.909 | 955  | 5336  |
| W3059      | 1.49  | Or-III | Hainan    | 10096 | 0.909 | 369  | 7380  |
| W0125      | 1.9   | Or-III | India     | 9666  | 0.909 | 240  | 7982  |
| W0171      | 5.25  | Or-II  | Thailand  | 13015 | 0.908 | 1194 | 3337  |
| W0153      | 2.08  | Or-III | India     | 9965  | 0.907 | 269  | 7611  |
| W3003      | 0.35  | Or-II  | Guangdong | 3451  | 0.907 | 53   | 15004 |
| W0134      | 0.88  | Or-III | India     | 5658  | 0.907 | 141  | 12480 |
| W0136      | 0.44  | Or-III | India     | 3375  | 0.906 | 62   | 15075 |
| W1096      | 3.75  | Or-II  | India     | 11100 | 0.906 | 1484 | 5122  |
| W1550      | 3.04  | Or-II  | Thailand  | 11387 | 0.905 | 1036 | 5249  |
| W2276      | 1.11  | Or-II  | Thailand  | 9000  | 0.905 | 124  | 8795  |
| W1891      | 1.39  | Or-II  | Thailand  | 9332  | 0.905 | 346  | 8198  |
| W0634      | 0.78  | Or-II  | Burma     | 5821  | 0.904 | 146  | 12278 |
| IRGC103937 | 10.03 | -      | Africa    | 14472 | 0.904 | 940  | 1915  |
| W0164      | 1.28  | Or-II  | Thailand  | 8311  | 0.904 | 205  | 9463  |
| W3056      | 0.63  | Or-III | Hainan    | 6157  | 0.903 | 144  | 11901 |
| W1747      | 1.14  | Or-I   | India     | 8664  | 0.903 | 177  | 9086  |
| W0593      | 0.72  | Or-III | Malaya    | 5496  | 0.902 | 69   | 12701 |
| W0628      | 1.74  | Or-II  | Burma     | 9114  | 0.902 | 305  | 8454  |
| W1766      | 2.58  | Or-III | India     | 11344 | 0.902 | 536  | 5751  |
| W0576      | 3.02  | Or-II  | Malaya    | 10795 | 0.902 | 1259 | 5632  |
| W2282      | 2.91  | Or-II  | Thailand  | 11200 | 0.901 | 927  | 5504  |
| W2306      | 2.64  | Or-I   | Laos      | 12509 | 0.901 | 226  | 4746  |
| W1862      | 2.04  | Or-II  | Thailand  | 10473 | 0.900 | 974  | 6250  |
| W0133      | 0.59  | Or-III | India     | 4535  | 0.900 | 108  | 13713 |
| W1940      | 4.36  | Or-II  | Thailand  | 12291 | 0.899 | 1414 | 3780  |
| W0549      | 1.11  | Or-III | India     | 7310  | 0.899 | 160  | 10572 |
| W1881      | 1.04  | Or-I   | Thailand  | 7822  | 0.899 | 72   | 10086 |
| W0132      | 1     | Or-II  | India     | 6199  | 0.899 | 178  | 11785 |
| W1916      | 3.03  | Or-II  | Thailand  | 12164 | 0.897 | 1056 | 4251  |
| W0137      | 0.68  | Or-III | India     | 4988  | 0.897 | 106  | 13197 |
| W1857      | 2.93  | Or-II  | Thailand  | 11106 | 0.897 | 861  | 5624  |
| W1790      | 5.28  | Or-II  | Thailand  | 13623 | 0.897 | 626  | 3053  |
| W2265      | 2.36  | Or-I   | Laos      | 12124 | 0.897 | 233  | 5115  |
| W2303      | 1.21  | Or-I   | Laos      | 8801  | 0.896 | 110  | 8930  |
| W1142      | 0.85  | Or-I   | India     | 6108  | 0.896 | 63   | 11981 |
| W1749      | 1.13  | Or-I   | India     | 8259  | 0.896 | 99   | 9544  |

|            |       |        |           |       |       |      |       |
|------------|-------|--------|-----------|-------|-------|------|-------|
| W0624      | 0.61  | Or-II  | Burma     | 4988  | 0.896 | 85   | 13207 |
| W2030      | 1.99  | Or-II  | Indonesia | 10302 | 0.895 | 405  | 6943  |
| W3012      | 1.61  | Or-III | Guangdong | 9982  | 0.894 | 290  | 7409  |
| W2298      | 0.71  | Or-I   | Laos      | 6112  | 0.894 | 42   | 11984 |
| W0168      | 1.23  | Or-I   | Thailand  | 7980  | 0.894 | 38   | 9899  |
| W3054      | 1.73  | Or-III | Hainan    | 9937  | 0.894 | 620  | 7128  |
| W0135      | 0.63  | Or-III | India     | 4664  | 0.894 | 99   | 13546 |
| W1832      | 1.24  | Or-I   | Thailand  | 9098  | 0.894 | 101  | 8582  |
| W3064      | 0.76  | Or-III | Hainan    | 6357  | 0.894 | 191  | 11558 |
| W1974      | 1.83  | Or-II  | Indonesia | 10112 | 0.894 | 435  | 7112  |
| W1970      | 1.26  | Or-I   | Indonesia | 8049  | 0.894 | 172  | 9683  |
| W1533      | 0.75  | Or-I   | India     | 6282  | 0.893 | 59   | 11771 |
| IRGC103472 | 10.29 | -      | Africa    | 14340 | 0.893 | 868  | 1943  |
| W2301      | 1.54  | Or-I   | Laos      | 9797  | 0.893 | 161  | 7730  |
| W1780      | 1.88  | Or-II  | India     | 9799  | 0.892 | 863  | 7013  |
| W2284      | 0.93  | Or-II  | Thailand  | 6913  | 0.892 | 230  | 10881 |
| W2022      | 3.5   | Or-II  | Indonesia | 11513 | 0.892 | 817  | 5136  |
| W0123      | 0.18  | Or-I   | India     | 2071  | 0.892 | 8    | 16531 |
| W2304      | 2.21  | Or-I   | Laos      | 11679 | 0.892 | 228  | 5537  |
| W3062      | 1.91  | Or-III | Hainan    | 11255 | 0.891 | 434  | 5802  |
| W1685      | 1.09  | Or-I   | India     | 7033  | 0.891 | 76   | 10893 |
| W1879      | 1.17  | Or-I   | Thailand  | 8723  | 0.891 | 233  | 8834  |
| W2299      | 1.21  | Or-I   | Laos      | 8285  | 0.890 | 92   | 9464  |
| W3058      | 1.21  | Or-III | Hainan    | 8916  | 0.890 | 318  | 8529  |
| W2296      | 1.24  | Or-I   | Cambodia  | 8612  | 0.890 | 176  | 9012  |
| W2307      | 2.2   | Or-I   | Laos      | 11480 | 0.890 | 261  | 5705  |
| W1770      | 0.97  | Or-I   | India     | 7576  | 0.890 | 100  | 10245 |
| W2271      | 1.29  | Or-I   | Thailand  | 8898  | 0.889 | 79   | 8777  |
| W3071      | 2.6   | Or-III | Hainan    | 10334 | 0.889 | 789  | 6450  |
| W2283      | 1.9   | Or-II  | Thailand  | 9668  | 0.889 | 580  | 7404  |
| W2024      | 3.61  | Or-II  | Indonesia | 11792 | 0.889 | 1117 | 4477  |
| W3063      | 1.16  | Or-III | Hainan    | 9068  | 0.888 | 236  | 8419  |
| W1896      | 2.69  | Or-II  | Thailand  | 11883 | 0.888 | 555  | 4929  |
| W1558      | 2.24  | Or-II  | Thailand  | 10113 | 0.888 | 571  | 6903  |
| IRGC103632 | 10.13 | -      | Africa    | 13885 | 0.887 | 793  | 2420  |
| W0149      | 1.32  | Or-III | India     | 7997  | 0.887 | 165  | 9683  |
| W3053      | 0.99  | Or-III | Hainan    | 7687  | 0.887 | 338  | 9858  |
| W0170      | 1.47  | Or-I   | Thailand  | 8027  | 0.887 | 68   | 9744  |
| W0635      | 0.44  | Or-II  | Burma     | 4043  | 0.887 | 25   | 14277 |
| W1736      | 1.39  | Or-II  | India     | 8037  | 0.887 | 161  | 9636  |
| W0166      | 0.55  | Or-II  | Thailand  | 3959  | 0.886 | 49   | 14346 |
| W1977      | 3.22  | Or-II  | Indonesia | 11290 | 0.886 | 1253 | 4870  |
| IRGC104574 | 7.35  | -      | Africa    | 13549 | 0.886 | 767  | 2800  |

|            |       |        |           |       |       |      |       |
|------------|-------|--------|-----------|-------|-------|------|-------|
| TOG7102    | 6.25  | -      | Africa    | 12125 | 0.886 | 271  | 4902  |
| W1912      | 1.4   | Or-I   | Thailand  | 9187  | 0.886 | 157  | 8332  |
| W2288      | 2.55  | Or-II  | Cambodia  | 10926 | 0.886 | 821  | 5702  |
| IRGC88812  | 78.63 | -      | Laos      | 15359 | 0.885 | 629  | 884   |
| W1126      | 2.29  | Or-II  | India     | 10281 | 0.885 | 662  | 6585  |
| W1893      | 1.25  | Or-I   | Thailand  | 8092  | 0.885 | 97   | 9622  |
| W2305      | 1.36  | Or-I   | Laos      | 9111  | 0.885 | 149  | 8418  |
| W1787      | 1.36  | Or-I   | Thailand  | 8867  | 0.885 | 196  | 8645  |
| W1853      | 1.11  | Or-I   | Thailand  | 8732  | 0.885 | 100  | 8893  |
| W2021      | 2.15  | Or-II  | Indonesia | 10019 | 0.885 | 726  | 6810  |
| W0106      | 1.53  | Or-I   | India     | 8643  | 0.885 | 109  | 8982  |
| W0630      | 0.67  | Or-I   | Burma     | 5045  | 0.884 | 34   | 13123 |
| W0165      | 0.75  | Or-II  | Thailand  | 5198  | 0.884 | 74   | 12908 |
| W1557      | 0.55  | Or-II  | Thailand  | 4703  | 0.884 | 68   | 13473 |
| W2302      | 2.22  | Or-I   | Laos      | 11089 | 0.883 | 344  | 5964  |
| Yuan3_9    | 12.46 | -      | Yunnan    | 14304 | 0.883 | 938  | 1724  |
| IRGC103469 | 12.12 | -      | Africa    | 13215 | 0.883 | 373  | 3521  |
| W1859      | 4.02  | Or-II  | Thailand  | 11336 | 0.883 | 1395 | 4623  |
| W0605      | 0.71  | Or-I   | Malaya    | 5494  | 0.883 | 41   | 12595 |
| TOG5949    | 7.75  | -      | Africa    | 13030 | 0.882 | 344  | 3745  |
| IRGC104206 | 9.72  | -      | Africa    | 13806 | 0.882 | 610  | 2598  |
| W3055      | 0.92  | Or-III | Hainan    | 7684  | 0.882 | 338  | 9811  |
| TOG5923    | 6.05  | -      | Africa    | 12739 | 0.882 | 328  | 4089  |
| W1754      | 1.78  | Or-I   | India     | 10503 | 0.882 | 185  | 6765  |
| W0102      | 1.08  | Or-I   | India     | 6721  | 0.882 | 69   | 11170 |
| W1895      | 1.63  | Or-II  | Thailand  | 9535  | 0.882 | 593  | 7453  |
| VOC4       | 18.27 | -      | Nepal     | 12534 | 0.882 | 2644 | 2000  |
| W2005      | 1.6   | Or-III | India     | 9048  | 0.882 | 121  | 8477  |
| W1619      | 0.81  | Or-I   | Thailand  | 6148  | 0.882 | 51   | 11836 |
| TOG5457    | 9.63  | -      | Africa    | 13196 | 0.881 | 471  | 3420  |
| W1866      | 1.29  | Or-I   | Thailand  | 9402  | 0.881 | 121  | 8072  |
| W1695      | 0.95  | Or-I   | Thailand  | 6503  | 0.881 | 176  | 11305 |
| TOG5467    | 14.23 | -      | Africa    | 13480 | 0.881 | 518  | 3039  |
| W1792      | 2.26  | Or-I   | Thailand  | 10829 | 0.881 | 246  | 6320  |
| W1743      | 0.96  | Or-I   | India     | 7540  | 0.881 | 105  | 10194 |
| W0124      | 0.83  | Or-I   | India     | 5856  | 0.881 | 43   | 12168 |
| IRGC104955 | 6.67  | -      | Africa    | 13607 | 0.880 | 600  | 2805  |
| W2263      | 1.48  | Or-I   | Cambodia  | 8364  | 0.880 | 72   | 9288  |
| W0107      | 1.62  | Or-I   | India     | 8747  | 0.880 | 80   | 8842  |
| W2197      | 2.7   | Or-II  | Indonesia | 11058 | 0.880 | 828  | 5465  |
| W1981      | 1.2   | Or-II  | Indonesia | 8067  | 0.880 | 372  | 9320  |
| W1925      | 0.92  | Or-I   | Thailand  | 6597  | 0.880 | 104  | 11258 |
| W3057      | 1.25  | Or-III | Hainan    | 9005  | 0.880 | 421  | 8203  |

|            |        |        |                      |       |       |     |       |
|------------|--------|--------|----------------------|-------|-------|-----|-------|
| W1690      | 1.19   | Or-I   | Thailand             | 7434  | 0.879 | 116 | 10290 |
| W0180      | 2.49   | Or-II  | Thailand             | 10287 | 0.879 | 292 | 6869  |
| W0152      | 1.44   | Or-I   | India                | 7922  | 0.879 | 100 | 9750  |
| W0626      | 1.08   | Or-I   | Burma                | 6836  | 0.879 | 89  | 10996 |
| W0101      | 1.24   | Or-I   | India                | 7531  | 0.879 | 52  | 10242 |
| W1921      | 0.96   | Or-I   | Thailand             | 7377  | 0.879 | 92  | 10377 |
| TOG7025    | 11.7   | -      | Africa               | 13111 | 0.879 | 377 | 3566  |
| W2275      | 0.75   | Or-I   | Thailand             | 6241  | 0.879 | 48  | 11711 |
| W0120      | 0.73   | Or-II  | India                | 5706  | 0.879 | 168 | 12199 |
| W1865      | 1.04   | Or-I   | Thailand             | 8364  | 0.877 | 121 | 9207  |
| W0627      | 0.9    | Or-I   | Burma                | 6122  | 0.877 | 44  | 11839 |
| W1546      | 0.87   | Or-I   | Thailand             | 6191  | 0.877 | 51  | 11753 |
| W1681      | 0.78   | Or-I   | India                | 5468  | 0.877 | 72  | 12555 |
| W1679      | 1.17   | Or-I   | India                | 7042  | 0.877 | 83  | 10746 |
| W1854      | 3.99   | Or-II  | Thailand             | 12226 | 0.877 | 444 | 4469  |
| IRGC103520 | 14.03  | -      | Africa               | 13955 | 0.876 | 605 | 2327  |
| W0174      | 2.5    | Or-II  | Thailand             | 10142 | 0.876 | 739 | 6545  |
| W2268      | 1.42   | Or-I   | Thailand             | 9424  | 0.876 | 151 | 7952  |
| W1727      | 1.15   | Or-I   | Thailand             | 7097  | 0.876 | 109 | 10649 |
| W1798      | 2.78   | Or-II  | Thailand             | 11365 | 0.875 | 578 | 5288  |
| W2277      | 1.08   | Or-I   | Thailand             | 7908  | 0.874 | 166 | 9648  |
| W1975      | 2.23   | Or-II  | Indonesia            | 10384 | 0.874 | 346 | 6634  |
| W1547      | 1.36   | Or-I   | Thailand             | 8059  | 0.874 | 86  | 9552  |
| W1726      | 1.07   | Or-I   | Thailand             | 6792  | 0.873 | 86  | 10998 |
| W2266      | 1.18   | Or-II  | Laos                 | 7462  | 0.873 | 112 | 10202 |
| W1731      | 1.23   | Or-I   | India                | 7128  | 0.873 | 112 | 10582 |
| W1700      | 0.86   | Or-I   | Thailand             | 5709  | 0.872 | 74  | 12243 |
| W1551      | 1.23   | Or-I   | Thailand             | 7717  | 0.871 | 111 | 9890  |
| W1849      | 8.42   | Or-II  | Thailand             | 13546 | 0.870 | 831 | 2456  |
| W1552      | 1.19   | Or-II  | Thailand             | 7646  | 0.869 | 164 | 9896  |
| IRGC67563  | 112.31 | -      | Africa               | 14369 | 0.869 | 732 | 1587  |
| IRGC68939  | 118.26 | -      | Africa               | 14385 | 0.868 | 739 | 1551  |
| W2025      | 0.88   | Or-II  | Indonesia            | 7074  | 0.868 | 158 | 10553 |
| W0169      | 0.87   | Or-II  | Thailand             | 5623  | 0.868 | 56  | 12324 |
| IRGC101049 | 114.35 | -      | Africa               | 14111 | 0.867 | 706 | 1886  |
| W2272      | 1.42   | Or-II  | Thailand             | 9217  | 0.867 | 160 | 8069  |
| IRGC75500  | 112.8  | -      | Africa               | 14323 | 0.866 | 733 | 1596  |
| IRGC68976  | 113.32 | -      | Africa               | 14152 | 0.866 | 703 | 1821  |
| W1698      | 1.36   | Or-I   | Thailand             | 7692  | 0.866 | 135 | 9845  |
| W1973      | 2.09   | Or-III | Indonesia            | 7761  | 0.865 | 177 | 9712  |
| IRGC96841  | 117.5  | -      | Africa               | 14102 | 0.865 | 713 | 1844  |
| HK47       | 14.44  | -      | Madhya Pradesh;India | 13643 | 0.862 | 804 | 2239  |
| L89_12     | 15.57  | -      | Vientiane;Laos       | 13699 | 0.862 | 834 | 2140  |

|             |       |        |                       |       |       |      |       |
|-------------|-------|--------|-----------------------|-------|-------|------|-------|
| W1884       | 1.9   | Or-II  | Thailand              | 9927  | 0.862 | 885  | 6462  |
| W0600       | 0.84  | Or-II  | Malaya                | 5879  | 0.862 | 221  | 11821 |
| W1850       | 3.93  | Or-II  | Thailand              | 11568 | 0.861 | 505  | 4914  |
| W1919       | 1.49  | Or-II  | Thailand              | 9220  | 0.860 | 429  | 7709  |
| W1554       | 1.92  | Or-II  | Thailand              | 9230  | 0.856 | 171  | 7912  |
| W1777       | 4.1   | Or-III | India                 | 11889 | 0.851 | 618  | 4269  |
| W1971       | 1.5   | Or-II  | Indonesia             | 8348  | 0.850 | 503  | 8538  |
| PADI_PADIAN | 15.75 | -      | Kromat Watu;Indonesia | 11952 | 0.844 | 1925 | 2776  |
| W2267       | 1.72  | Or-III | Laos                  | 9157  | 0.842 | 237  | 7755  |
| W1979       | 1.79  | Or-II  | Indonesia             | 8739  | 0.842 | 384  | 8103  |
| W1870       | 3.48  | Or-II  | Thailand              | 11213 | 0.840 | 964  | 4555  |
| W1978       | 1.57  | Or-II  | Indonesia             | 8053  | 0.835 | 521  | 8696  |
| W2017       | 1.8   | Or-II  | Indonesia             | 8654  | 0.835 | 417  | 8079  |
| W2308       | 2.11  | Or-II  | Laos                  | 9256  | 0.835 | 327  | 7445  |
| W1976       | 1.49  | Or-II  | Indonesia             | 8328  | 0.830 | 242  | 8586  |
| W1683       | 5.09  | Or-II  | India                 | 11018 | 0.825 | 900  | 4613  |
| W1972       | 2.29  | Or-II  | Indonesia             | 9285  | 0.825 | 495  | 7115  |
| W1939       | 1.36  | Or-II  | Thailand              | 8253  | 0.825 | 218  | 8636  |
| W0108       | 1.47  | Or-II  | India                 | 7470  | 0.822 | 278  | 9491  |
| W1555       | 0.7   | Or-II  | Thailand              | 4959  | 0.818 | 63   | 12739 |

**Table S7** List of 163 genes in the 28 DR-I regions.

| #Region                 | Gene           | Ka    | Ks    | Ka/Ks | Possible Function |
|-------------------------|----------------|-------|-------|-------|-------------------|
| chr01:35499730-35510003 | LOC_Os01g61380 | 0.002 | 0.007 | 0.337 | seed              |
| chr01:35499730-35510003 | LOC_Os01g61390 | 0.001 | 0.002 | 0.707 |                   |
| chr01:35499730-35510003 | LOC_Os01g61400 | 0.001 | 0     | -     |                   |
| chr01:35499730-35510003 | LOC_Os01g61410 | 0     | 0     | -     |                   |
| chr01:35839043-35890683 | LOC_Os01g61920 | 0     | 0.012 | 0     |                   |
| chr01:35839043-35890683 | LOC_Os01g61930 | 0.001 | 0.002 | 0.629 |                   |
| chr01:35839043-35890683 | LOC_Os01g61940 | 0.001 | 0     | -     |                   |
| chr01:35839043-35890683 | LOC_Os01g61950 | 0.010 | 0.013 | 0.777 |                   |
| chr01:35839043-35890683 | LOC_Os01g61960 | 0     | 0.005 | 0     |                   |
| chr01:35839043-35890683 | LOC_Os01g61970 | 0.001 | 0     | -     |                   |
| chr01:35839043-35890683 | LOC_Os01g61980 | 0.001 | 0     | -     |                   |
| chr01:35839043-35890683 | LOC_Os01g61990 | 0.002 | 0     | -     |                   |
| chr01:35839043-35890683 | LOC_Os01g62000 | 0     | 0.004 | 0     |                   |
| chr02:13139975-13160003 | LOC_Os02g22084 | 0     | 0     | -     |                   |
| chr02:13139975-13160003 | LOC_Os02g22090 | 0.001 | 0.001 | 0.614 |                   |
| chr02:13139975-13160003 | LOC_Os02g22100 | 0.003 | 0.007 | 0.465 |                   |
| chr02:13349983-13360044 | LOC_Os02g22370 | 0.001 | 0.002 | 0.616 |                   |
| chr02:14944936-14962544 | LOC_Os02g25580 | 0.001 | 0.005 | 0.144 |                   |
| chr02:14944936-14962544 | LOC_Os02g25590 | 0     | 0     | -     |                   |
| chr02:27708263-27721727 | LOC_Os02g45540 | 0.003 | 0.004 | 0.638 |                   |
| chr02:27708263-27721727 | LOC_Os02g45550 | 0     | 0     | -     |                   |
| chr03:1579192-1602557   | LOC_Os03g03600 | 0     | 0.013 | 0     |                   |
| chr03:1579192-1602557   | LOC_Os03g03610 | 0.001 | 0     | -     |                   |
| chr03:2483329-2542460   | LOC_Os03g05100 | 0.002 | 0.017 | 0.093 |                   |
| chr03:2483329-2542460   | LOC_Os03g05110 | 0.001 | 0.010 | 0.072 |                   |
| chr03:2483329-2542460   | LOC_Os03g05120 | 0.010 | 0.010 | 1.040 |                   |
| chr03:2483329-2542460   | LOC_Os03g05130 | 0     | 0     | -     |                   |
| chr03:2483329-2542460   | LOC_Os03g05140 | 0.002 | 0.001 | 1.854 | anther;shoot      |
| chr03:2483329-2542460   | LOC_Os03g05150 | 0     | 0     | -     |                   |
| chr03:2483329-2542460   | LOC_Os03g05160 | 0     | 0     | -     |                   |
| chr03:2483329-2542460   | LOC_Os03g05170 | 0.004 | 0     | -     |                   |
| chr03:2483329-2542460   | LOC_Os03g05180 | 0.002 | 0     | -     |                   |
| chr03:2483329-2542460   | LOC_Os03g05200 | 0.003 | 0.003 | 0.953 |                   |
| chr03:2483329-2542460   | LOC_Os03g05210 | 0.001 | 0.003 | 0.390 |                   |
| chr03:2483329-2542460   | LOC_Os03g05220 | 0     | 0     | -     |                   |
| chr03:2483329-2542460   | LOC_Os03g05225 | 0     | 0     | -     |                   |
| chr03:2483329-2542460   | LOC_Os03g05240 | 0.002 | 0.011 | 0.206 |                   |
| chr03:2483329-2542460   | LOC_Os03g05250 | 0.004 | 0.007 | 0.611 |                   |
| chr03:2706518-2724355   | LOC_Os03g05470 | 0     | 0.006 | 0     |                   |
| chr03:2706518-2724355   | LOC_Os03g05480 | 0.004 | 0.002 | 1.815 |                   |



|                       |                |       |       |       |            |
|-----------------------|----------------|-------|-------|-------|------------|
| chr03:2706518-2724355 | LOC_Os03g05490 | 0     | 0.006 | 0     |            |
| chr03:2706518-2724355 | LOC_Os03g05500 | 0     | 0     | -     |            |
| chr03:2832279-2854311 | LOC_Os03g05680 | 0.001 | 0     | -     |            |
| chr03:2832279-2854311 | LOC_Os03g05690 | 0.003 | 0     | -     |            |
| chr03:2832279-2854311 | LOC_Os03g05700 | 0     | 0     | -     |            |
| chr03:2832279-2854311 | LOC_Os03g05710 | 0     | 0     | -     |            |
| chr03:2832279-2854311 | LOC_Os03g05720 | 0     | 0.005 | 0.101 |            |
| chr03:2832279-2854311 | LOC_Os03g05730 | 0.001 | 0     | -     |            |
| chr03:2896026-2923841 | LOC_Os03g05800 | 0.004 | 0     | -     |            |
| chr03:2896026-2923841 | LOC_Os03g05806 | 0.001 | 0     | -     |            |
| chr03:2896026-2923841 | LOC_Os03g05812 | 0.001 | 0.002 | 0.614 |            |
| chr03:2896026-2923841 | LOC_Os03g05820 | 0.001 | 0.011 | 0.084 | seed       |
| chr03:2896026-2923841 | LOC_Os03g05830 | 0.003 | 0     | -     |            |
| chr03:2997394-3195565 | LOC_Os03g06000 | 0     | 0.011 | 0     |            |
| chr03:2997394-3195565 | LOC_Os03g06010 | 0     | 0     | -     | coleoptile |
| chr03:2997394-3195565 | LOC_Os03g06020 | 0.002 | 0     | -     | coleoptile |
| chr03:2997394-3195565 | LOC_Os03g06030 | 0.005 | 0.016 | 0.338 | coleoptile |
| chr03:2997394-3195565 | LOC_Os03g06040 | 0     | 0.017 | 0     | coleoptile |
| chr03:2997394-3195565 | LOC_Os03g06050 | 0.002 | 0     | -     | coleoptile |
| chr03:2997394-3195565 | LOC_Os03g06060 | 0.006 | 0     | -     | coleoptile |
| chr03:2997394-3195565 | LOC_Os03g06070 | 0.001 | 0.005 | 0.178 |            |
| chr03:2997394-3195565 | LOC_Os03g06080 | 0.003 | 0     | -     |            |
| chr03:2997394-3195565 | LOC_Os03g06090 | 0.001 | 0     | -     |            |
| chr03:2997394-3195565 | LOC_Os03g06100 | 0.002 | 0     | -     |            |
| chr03:2997394-3195565 | LOC_Os03g06110 | 0.001 | 0     | -     |            |
| chr03:2997394-3195565 | LOC_Os03g06120 | 0     | 0.003 | 0     | seed       |
| chr03:2997394-3195565 | LOC_Os03g06139 | 0.001 | 0     | -     |            |
| chr03:2997394-3195565 | LOC_Os03g06160 | 0.001 | 0     | -     |            |
| chr03:2997394-3195565 | LOC_Os03g06170 | 0     | 0     | -     |            |
| chr03:2997394-3195565 | LOC_Os03g06180 | 0.001 | 0.008 | 0.157 |            |
| chr03:2997394-3195565 | LOC_Os03g06190 | 0.001 | 0     | -     |            |
| chr03:2997394-3195565 | LOC_Os03g06200 | 0     | 0.006 | 0     |            |
| chr03:2997394-3195565 | LOC_Os03g06210 | 0.005 | 0.005 | 1.060 |            |
| chr03:2997394-3195565 | LOC_Os03g06220 | 0     | 0.003 | 0     |            |
| chr03:2997394-3195565 | LOC_Os03g06230 | 0.004 | 0.003 | 1.208 |            |
| chr03:2997394-3195565 | LOC_Os03g06240 | 0.004 | 0.004 | 0.977 |            |
| chr03:2997394-3195565 | LOC_Os03g06250 | 0.002 | 0     | -     |            |
| chr03:2997394-3195565 | LOC_Os03g06260 | 0     | 0     | -     |            |
| chr03:2997394-3195565 | LOC_Os03g06270 | 0     | 0     | -     |            |
| chr03:2997394-3195565 | LOC_Os03g06280 | 0.005 | 0     | -     |            |
| chr03:2997394-3195565 | LOC_Os03g06290 | 0.004 | 0.003 | 1.320 |            |
| chr03:2997394-3195565 | LOC_Os03g06330 | 0     | 0     | -     |            |
| chr03:2997394-3195565 | LOC_Os03g06340 | 0.001 | 0.003 | 0.325 |            |

|                         |                |       |       |       |              |
|-------------------------|----------------|-------|-------|-------|--------------|
| chr03:2997394-3195565   | LOC_Os03g06350 | 0     | 0     | -     |              |
| chr03:2997394-3195565   | LOC_Os03g06360 | 0.002 | 0     | -     | seed         |
| chr03:2997394-3195565   | LOC_Os03g06370 | 0.003 | 0     | -     |              |
| chr03:2997394-3195565   | LOC_Os03g06379 | 0.005 | 0     | -     |              |
| chr03:2997394-3195565   | LOC_Os03g06390 | 0     | 0     | -     |              |
| chr03:3479756-3498823   | LOC_Os03g06880 | 0.001 | 0.006 | 0.168 |              |
| chr03:3479756-3498823   | LOC_Os03g06890 | 0.001 | 0.006 | 0.193 | seed         |
| chr03:3479756-3498823   | LOC_Os03g06900 | 0     | 0     | -     |              |
| chr03:24189350-24230136 | LOC_Os03g43390 | 0.001 | 0.007 | 0.221 |              |
| chr03:24189350-24230136 | LOC_Os03g43400 | 0.002 | 0.005 | 0.376 | root         |
| chr03:24189350-24230136 | LOC_Os03g43410 | 0     | 0.006 | 0     | root         |
| chr03:24189350-24230136 | LOC_Os03g43420 | 0.001 | 0.004 | 0.349 |              |
| chr03:24189350-24230136 | LOC_Os03g43430 | 0     | 0     | -     |              |
| chr03:24189350-24230136 | LOC_Os03g43440 | 0.001 | 0     | -     |              |
| chr03:28469725-28489493 | LOC_Os03g49940 | 0.001 | 0.006 | 0.175 |              |
| chr03:28469725-28489493 | LOC_Os03g49960 | 0.003 | 0     | -     |              |
| chr04:34409908-34420007 | LOC_Os04g57780 | 0.002 | 0     | -     |              |
| chr04:34409908-34420007 | LOC_Os04g57790 | 0.002 | 0     | -     |              |
| chr04:34409908-34420007 | LOC_Os04g57800 | 0.001 | 0.002 | 0.384 |              |
| chr04:34469603-34500654 | LOC_Os04g57880 | 0.002 | 0.003 | 0.694 |              |
| chr04:34469603-34500654 | LOC_Os04g57890 | 0.001 | 0     | -     |              |
| chr04:34469603-34500654 | LOC_Os04g57900 | 0.001 | 0     | -     |              |
| chr05:21659599-21670204 | LOC_Os05g37070 | 0     | 0     | -     |              |
| chr05:21659599-21670204 | LOC_Os05g37080 | 0.003 | 0     | -     |              |
| chr05:22789981-22800012 | LOC_Os05g38850 | 0.001 | 0.006 | 0.101 |              |
| chr05:22869880-22880236 | LOC_Os05g38984 | 0     | 0.027 | 0     |              |
| chr05:22869880-22880236 | LOC_Os05g38990 | 0.003 | 0     | -     | flower       |
| chr05:22869880-22880236 | LOC_Os05g39000 | 0.001 | 0.007 | 0.078 |              |
| chr05:24026607-24070766 | LOC_Os05g40990 | 0.003 | 0     | -     |              |
| chr05:24026607-24070766 | LOC_Os05g41000 | 0     | 0.003 | 0     |              |
| chr05:24026607-24070766 | LOC_Os05g41010 | 0.001 | 0     | -     |              |
| chr05:24026607-24070766 | LOC_Os05g41030 | 0.002 | 0     | -     | seed storage |
| chr05:24026607-24070766 | LOC_Os05g41040 | 0     | 0     | -     |              |
| chr05:24026607-24070766 | LOC_Os05g41050 | 0     | 0.008 | 0     |              |
| chr05:24026607-24070766 | LOC_Os05g41060 | 0.002 | 0     | -     |              |
| chr05:24026607-24070766 | LOC_Os05g41070 | 0.005 | 0.037 | 0.142 |              |
| chr05:24026607-24070766 | LOC_Os05g41080 | 0.006 | 0     | -     |              |
| chr05:24300403-24330214 | LOC_Os05g41510 | 0     | 0.001 | 0.278 |              |
| chr05:24300403-24330214 | LOC_Os05g41520 | 0     | 0.004 | 0     |              |
| chr05:24300403-24330214 | LOC_Os05g41530 | 0     | 0     | -     |              |
| chr05:24300403-24330214 | LOC_Os05g41540 | 0     | 0.006 | 0     |              |
| chr05:24300403-24330214 | LOC_Os05g41550 | 0.008 | 0.016 | 0.503 |              |
| chr05:26824033-26840483 | LOC_Os05g46250 | 0.004 | 0     | -     |              |

|                         |                |       |       |       |                     |
|-------------------------|----------------|-------|-------|-------|---------------------|
| chr05:26824033-26840483 | LOC_Os05g46260 | 0.001 | 0.002 | 0.642 |                     |
| chr05:26824033-26840483 | LOC_Os05g46270 | 0     | 0.004 | 0     |                     |
| chr05:26824033-26840483 | LOC_Os05g46280 | 0     | 0.014 | 0     |                     |
| chr05:26824033-26840483 | LOC_Os05g46290 | 0.001 | 0.003 | 0.297 |                     |
| chr07:4149981-4163826   | LOC_Os07g08170 | 0.002 | 0     | -     | pollen              |
| chr07:4149981-4163826   | LOC_Os07g08180 | 0.002 | 0.004 | 0.645 |                     |
| chr07:25598750-25620217 | LOC_Os07g42750 | 0.002 | 0.004 | 0.586 |                     |
| chr07:25598750-25620217 | LOC_Os07g42760 | 0.003 | 0.003 | 0.993 |                     |
| chr07:25598750-25620217 | LOC_Os07g42770 | 0.002 | 0.003 | 0.572 |                     |
| chr09:22759164-22771433 | LOC_Os09g39660 | 0.002 | 0.005 | 0.296 |                     |
| chr09:22759164-22771433 | LOC_Os09g39670 | 0.001 | 0.004 | 0.325 |                     |
| chr09:22759164-22771433 | LOC_Os09g39680 | 0     | 0.005 | 0     |                     |
| chr09:22910542-22930021 | LOC_Os09g39960 | 0.002 | 0     | -     |                     |
| chr09:22910542-22930021 | LOC_Os09g39970 | 0.001 | 0.004 | 0.308 |                     |
| chr09:22910542-22930021 | LOC_Os09g39980 | 0.002 | 0     | -     |                     |
| chr10:21289972-21400480 | LOC_Os10g39780 | 0     | 0.007 | 0     |                     |
| chr10:21289972-21400480 | LOC_Os10g39790 | 0.003 | 0     | -     |                     |
| chr10:21289972-21400480 | LOC_Os10g39800 | 0.003 | 0.009 | 0.307 |                     |
| chr10:21289972-21400480 | LOC_Os10g39810 | 0     | 0     | -     | plant cuticular wax |
| chr10:21289972-21400480 | LOC_Os10g39820 | 0.002 | 0     | -     | light               |
| chr10:21289972-21400480 | LOC_Os10g39830 | 0     | 0.006 | 0     |                     |
| chr10:21289972-21400480 | LOC_Os10g39840 | 0.001 | 0     | -     |                     |
| chr10:21289972-21400480 | LOC_Os10g39850 | 0.002 | 0.002 | 1.001 |                     |
| chr10:21289972-21400480 | LOC_Os10g39860 | 0.004 | 0.019 | 0.224 |                     |
| chr10:21289972-21400480 | LOC_Os10g39870 | 0     | 0     | -     |                     |
| chr10:21289972-21400480 | LOC_Os10g39880 | 0.012 | 0.006 | 1.931 | light               |
| chr10:21289972-21400480 | LOC_Os10g39890 | 0     | 0.032 | 0     |                     |
| chr10:21289972-21400480 | LOC_Os10g39900 | 0.001 | 0.004 | 0.203 |                     |
| chr10:21289972-21400480 | LOC_Os10g39910 | 0.001 | 0.005 | 0.152 |                     |
| chr10:21289972-21400480 | LOC_Os10g39920 | 0.008 | 0     | -     |                     |
| chr10:21289972-21400480 | LOC_Os10g39930 | 0.002 | 0.002 | 0.670 |                     |
| chr10:21289972-21400480 | LOC_Os10g39932 | 0     | 0     | -     |                     |
| chr10:21289972-21400480 | LOC_Os10g39934 | 0.003 | 0     | -     |                     |
| chr10:21289972-21400480 | LOC_Os10g39936 | 0.004 | 0.005 | 0.736 |                     |
| chr10:21289972-21400480 | LOC_Os10g39940 | 0.011 | 0     | -     |                     |
| chr10:21289972-21400480 | LOC_Os10g39950 | 0.002 | 0.003 | 0.945 |                     |

**Table S8** List of 110 genes in the 28 DR-II regions.

| Gene_ID        | Possible Function   | Gene_ID        | Possible Function                                                         |
|----------------|---------------------|----------------|---------------------------------------------------------------------------|
| LOC_Os01g15438 |                     | LOC_Os07g05740 |                                                                           |
| LOC_Os01g15448 |                     | LOC_Os07g05750 |                                                                           |
| LOC_Os01g15460 | rice resistance     | LOC_Os07g05820 |                                                                           |
| LOC_Os03g46320 |                     | LOC_Os07g05830 |                                                                           |
| LOC_Os03g46325 |                     | LOC_Os07g05840 |                                                                           |
| LOC_Os03g46330 | root                | LOC_Os07g05950 |                                                                           |
| LOC_Os03g46340 |                     | LOC_Os07g05960 |                                                                           |
| LOC_Os04g43840 | <i>LABA1</i> , awns | LOC_Os07g05970 |                                                                           |
| LOC_Os04g43850 |                     | LOC_Os07g05984 |                                                                           |
| LOC_Os04g43860 |                     | LOC_Os07g06000 |                                                                           |
| LOC_Os04g43870 |                     | LOC_Os07g06010 |                                                                           |
| LOC_Os04g43880 |                     | LOC_Os07g06130 |                                                                           |
| LOC_Os04g43890 |                     | LOC_Os07g06274 |                                                                           |
| LOC_Os04g43900 |                     | LOC_Os07g06380 |                                                                           |
| LOC_Os04g43910 |                     | LOC_Os07g06390 |                                                                           |
| LOC_Os04g43916 |                     | LOC_Os07g06400 |                                                                           |
| LOC_Os04g43922 |                     | LOC_Os07g07410 |                                                                           |
| LOC_Os04g44030 |                     | LOC_Os07g07420 | light                                                                     |
| LOC_Os04g44050 |                     | LOC_Os07g07430 |                                                                           |
| LOC_Os04g44060 |                     | LOC_Os07g07540 | dwarf                                                                     |
| LOC_Os04g44290 |                     | LOC_Os07g07550 |                                                                           |
| LOC_Os04g44300 |                     | LOC_Os07g07560 | cell growth and<br>shape formation                                        |
| LOC_Os04g44320 |                     | LOC_Os07g07570 |                                                                           |
| LOC_Os04g44330 |                     | LOC_Os07g07974 |                                                                           |
| LOC_Os04g44340 |                     | LOC_Os07g07990 |                                                                           |
| LOC_Os04g44530 |                     | LOC_Os07g08030 |                                                                           |
| LOC_Os04g44540 |                     | LOC_Os07g08040 |                                                                           |
| LOC_Os04g45320 |                     | LOC_Os07g08050 |                                                                           |
| LOC_Os04g45330 | flower              | LOC_Os07g08060 |                                                                           |
| LOC_Os04g45340 |                     | LOC_Os07g08070 |                                                                           |
| LOC_Os04g45550 |                     | LOC_Os08g37490 | response to<br>environmental<br>stress, pathogens<br>and light conditions |
| LOC_Os04g45560 |                     | LOC_Os08g37500 |                                                                           |
| LOC_Os04g45570 |                     | LOC_Os08g37520 |                                                                           |
| LOC_Os04g45580 |                     | LOC_Os08g37530 |                                                                           |
| LOC_Os04g45665 |                     | LOC_Os08g37595 |                                                                           |
| LOC_Os04g45670 |                     | LOC_Os08g37600 | metal                                                                     |

|                 |                                 |                |                                           |
|-----------------|---------------------------------|----------------|-------------------------------------------|
| LOC_Os04g45690  |                                 | LOC_Os08g37605 |                                           |
| LOC_Os04g45700  | root                            | LOC_Os08g37610 |                                           |
| LOC_Os04g45710  |                                 | LOC_Os08g37630 |                                           |
| LOC_Os04g45720  |                                 | LOC_Os08g37640 |                                           |
| LOC_Os04g45730  |                                 | LOC_Os08g37650 |                                           |
| LOC_Os04g45670  |                                 | LOC_Os08g37660 |                                           |
| LOC_Os04g45680  |                                 | LOC_Os08g37670 |                                           |
| LOC_Os04g454710 |                                 | LOC_Os08g37760 |                                           |
| LOC_Os04g56850  | growth                          | LOC_Os08g37770 |                                           |
| LOC_Os04g56995  |                                 | LOC_Os08g37780 |                                           |
| LOC_Os04g57010  | resistance                      | LOC_Os08g37790 |                                           |
| LOC_Os04g57020  |                                 | LOC_Os08g37874 |                                           |
| LOC_Os04g57520  |                                 | LOC_Os08g37890 | <i>GAD1</i> , awn, grain<br>number/length |
| LOC_Os04g57530  | <i>sh4</i> , seed<br>shattering | LOC_Os08g37904 |                                           |
| LOC_Os04g57540  |                                 | LOC_Os08g37920 |                                           |
| LOC_Os04g57550  |                                 | LOC_Os08g37930 |                                           |
| LOC_Os04g57560  |                                 | LOC_Os08g37940 |                                           |
| LOC_Os05g51790  |                                 | LOC_Os08g37950 |                                           |
| LOC_Os07g05720  |                                 | LOC_Os12g40279 |                                           |
